# Supplementary material for: Prevalence and correlates of symptoms of post-traumatic stress disorder among Chinese healthcare workers exposed to physical violence: a cross-sectional study
Source: PubMed Central journal article supplement (PMC5642665; doi:10.1136/bmjopen-2017-016810), 2017-08-01
Supplement: bmjopen-2017-016810.draft_revisions.pdf [file bmjopen-2017-016810.draft_revisions.pdf]

# BMJ Open

BMJ Open is committed to open peer review. As part of this commitment we make the peer review history of every article we publish publicly available.

When an article is published we post the peer reviewers' comments and the authors' responses online. We also post the versions of the paper that were used during peer review. These are the versions that the peer review comments apply to.

The versions of the paper that follow are the versions that were submitted during the peer review process. They are not the versions of record or the final published versions. They should not be cited or distributed as the published version of this manuscript.

BMJ Open is an open access journal and the full, final, typeset and author-corrected version of record of the manuscript is available on our site with no access controls, subscription charges or pay-per-view fees (<http://bmjopen.bmj.com>).

If you have any questions on BMJ Open's open peer review process please email [editorial.bmjopen@bmj.com](mailto:editorial.bmjopen@bmj.com)

# BMJ Open

## Prevalence and correlates of symptoms of post-traumatic stress disorder among Chinese healthcare workers exposed to physical violence : a cross-sectional study

|                                 |                                                                                                                                                                                                                                                                                    |
|---------------------------------|------------------------------------------------------------------------------------------------------------------------------------------------------------------------------------------------------------------------------------------------------------------------------------|
| Journal:                        | <i>BMJ Open</i>                                                                                                                                                                                                                                                                    |
| Manuscript ID                   | bmjopen-2017-016810                                                                                                                                                                                                                                                                |
| Article Type:                   | Research                                                                                                                                                                                                                                                                           |
| Date Submitted by the Author:   | 12-Mar-2017                                                                                                                                                                                                                                                                        |
| Complete List of Authors:       | Shi, Lei<br>Wang, Lingling ; Chinese Hospital Association, Department of Autonomous Protection<br>Jia, Xiaoli<br>Li, Zhe<br>Mu, Huitong<br>Liu, Xin<br>Peng, Boshi<br>Li, Anqi<br>Fan, Lihua; Harbin Medical University, Department of Health Management , School of Public Health |
| <b>Primary Subject Heading</b>: | Health policy                                                                                                                                                                                                                                                                      |
| Secondary Subject Heading:      | Health policy, Health services research, Mental health                                                                                                                                                                                                                             |
| Keywords:                       | Posttraumatic stress disorder symptoms (PTSD), social support, coping styles, MENTAL HEALTH, physical violence, personality                                                                                                                                                        |
|                                 |                                                                                                                                                                                                                                                                                    |

SCHOLARONE™  
Manuscripts

1  
2  
3  
4 **Prevalence and correlates of symptoms of post-traumatic stress disorder among**  
5  
6 **Chinese healthcare workers exposed to physical violence : a cross-sectional study**  
7  
8

9  
10  
11 Lei Shi,<sup>1</sup> Lingling Wang,<sup>2</sup> Xiaoli Jia,<sup>2</sup> Zhe Li,<sup>1</sup> Huitong Mu,<sup>1</sup> Xin Liu,<sup>1</sup> Boshi Peng,<sup>3</sup> Anqi Li,<sup>1</sup>

12  
13 Lihua Fan<sup>1</sup>  
14  
15

16  
17  
18  
19 **Correspondence to:** Lihua Fan, School of Public Health, Harbin Medical University, 157 Baojian

20  
21 Road, Nangang District, Harbin 150081, China; E-mail: [lihuafan@126.com](mailto:lihuafan@126.com)  
22  
23

24  
25  
26 <sup>1</sup>Department of Health Management, School of Public Health, Harbin Medical University, Harbin,  
27 Heilongjiang, China  
28

29  
30  
31 <sup>2</sup>Department of Autonomous Protection, Chinese Hospital Association, Beijing, China  
32  
33

34  
35 <sup>3</sup>Department of Scientific Research, The Second Affiliated Hospital of Harbin Medical University,  
36 Harbin, Heilongjiang, China  
37  
38  
39  
40  
41  
42  
43  
44  
45  
46  
47  
48  
49  
50  
51  
52  
53  
54  
55  
56  
57  
58  
59  
60

**Abstract****Objectives**

Post-traumatic stress disorder (PTSD) is a common psychological maladjustment among healthcare workers after undergoing a traumatic event. Our aim was to measure the prevalence of PTSD symptoms, and to explore the associations of demographic characteristics, social support, personality traits, and coping styles with PTSD symptoms among Chinese healthcare workers exposed to physical violence.

**Methods**

A cross-sectional study was conducted using standard questionnaires: the Workplace Violence Scale, the Post-traumatic Stress Disorder Checklist-Civilian Version, the Social Support Rating Scale (SSRS), the Revised Eysenck Personality Questionnaire-Short Scale (EPQ-RSC) and Trait Coping Style Questionnaire (TCSQ). We employed a convenient sampling method to collect data from March 2015 to September 2016. A total of 2706 participants from 39 public hospitals located in Heilongjiang, Hebei, and Beijing Provinces of China (effective response rate = 84.25%). This study was only about physical violence, 368 participants were eligible for the study. Pearson's correlations were used to examine correlations among continuous variables. Hierarchical regression analysis were used to examine the associations of the demographic characteristics and scores on the SSRS, EPQ-RSC, and TCSQ with PTSD symptoms.

**Results**

Overall, the prevalence of physical violence in the previous 12 months was 13.60%. The prevalence of PTSD symptoms was 28.0%. Most of the participants (47.0%) did not appear to have PTSD symptoms after experiencing physical violence. The healthcare workers adopted negative coping with

1  
2  
3  
4 physical violence was positively associated with the development of PTSD symptoms ( $\beta = 0.179, P <$   
5  
6  $0.01$ ). As expected, social support was negatively associated with PTSD symptoms ( $\beta = -0.129, P <$   
7  
8  $0.05$ ) and was a protective factor. In women, positive coping of TCSQ was significantly associated  
9  
10 with PTSD symptoms ( $\beta = -0.229, P < 0.01$ ). However, the effect of positive coping was not significant  
11  
12 in men.  
13  
14

### 15 16 **Conclusions**

17  
18 The prevalence of PTSD symptoms among healthcare workers who experienced physical violence  
19  
20 was high. The positive effects of social support on PTSD symptoms suggest that organizational and  
21  
22 familial support has practical implications for interventions to promote psychological health. The  
23  
24 healthcare workers' personalities and coping styles also influenced development of the PTSD  
25  
26 symptoms. Therefore, it is imperative to adopt correct coping styles after experiencing a traumatic  
27  
28 events.  
29  
30  
31  
32  
33  
34  
35

### 36 **Strengths and limitations of this study**

- 37  
38  
39 ▪ In China, there were relatively few studies on PTSD symptoms after healthcare workers exposed to  
40  
41 physical violence.
- 42  
43  
44 ▪ We assessed the prevalence of PTSD symptoms, and to explore the correlates of PTSD symptoms  
45  
46 among Chinese healthcare workers exposed to physical violence.
- 47  
48  
49 ▪ Our study was only conducted at 39 public hospitals of three provinces, and large sample size  
50  
51 research could contribute to the generalization of our findings.
- 52  
53  
54 ▪ The retrospective approach to self-reported PTSD symptoms used by respondents may cause recall  
55  
56 and report bias.  
57  
58  
59  
60

## BACKGROUND

Post-traumatic stress disorder (PTSD) is generally recognized as a psychological state of imbalance, characterized by a series of chronic emotional reactions to a traumatic event, including re-experiencing, avoidance and heightened arousal.<sup>1-3</sup> A substantial number of studies indicate that almost all people exhibit intrusive and repetitious symptoms after exposure to excessive stress,<sup>4</sup> however, only a small percentage develop avoidance and hyper-arousal symptoms. Therefore, most individuals showing PTSD symptoms after exposure to a traumatic event recover within weeks or months. However, 10%–25% might develop chronic PTSD that lasts for several months, years, or even a lifetime.<sup>5</sup> PTSD originated from reports of the war trauma, and then was applied gradually to a variety of man-made and natural disasters.<sup>6</sup> Scholars have reported that the incidence of PTSD among male and female Vietnam veterans in the USA is 15.2% and 8.5%, respectively.<sup>7</sup> There are differences in the incidence rates of PTSD and for various types of trauma in China. For instance, PTSD was reported to be 8.65% among soldiers assigned to military vehicles at high altitudes, 33.89% in flood disaster survivors, 18.8% in earthquake survivors, 41% in traffic accident survivors and 78.6% in survivors after a serious explosion.<sup>8</sup> Therefore, most of the Chinese studies on PTSD have focused on wars, traffic accidents, and natural disasters.<sup>9-11</sup>

Previous studies have found that the death of a child, medical emergencies, accidental trauma, workplace violence, suicide and issues related to hospital management are ranked as the top six trauma events seen in hospitals.<sup>12</sup> Physical violence not only leads to direct economic loss, death and physical injury, but also cause long-term adverse psychological consequences.<sup>13-16</sup> Several studies have estimated the prevalence of PTSD symptoms among emergency department (ED) staff to range from 10% to 25%, which might be attributed to differences in the studies' sample characteristics, designs,

1  
2  
3 definitions, and diagnostic tools for PTSD due to their varied cultural backgrounds.<sup>17-19</sup> There are also  
4  
5 reports of the occurrence of PTSD among Chinese nurses working in the ED, intensive care unit, and  
6  
7 operating room. However, the number of research studies on PTSD among healthcare workers has been  
8  
9 relatively few in China.  
10  
11

12  
13 Demographic variables (e.g., age, gender, and educational level), and psychological and social  
14  
15 variables (e.g., personality, attribution style, and social support) have been found to be significantly  
16  
17 correlated with violence-related PTSD symptoms.<sup>20-23</sup> Social support has been found to be an effective  
18  
19 emotional regulator under conditions of traumatic stress.<sup>24</sup> Furthermore, coping styles and personality  
20  
21 characteristics have also been identified as factors influencing the development of PTSD  
22  
23 symptoms.<sup>25-26</sup>  
24  
25  
26  
27

28  
29 In this study, we aimed to assess the prevalence of PTSD symptoms, and to explore the  
30  
31 associations of demographic characteristics, social support, personality characteristics, and coping  
32  
33 styles with PTSD symptoms among Chinese healthcare workers exposed to physical violence.  
34  
35  
36  
37

## 38 39 **METHODS**

### 40 41 **Participants and procedure**

42  
43 Between March 2015 through September 2016, a cross-sectional study was conducted with a sample of  
44  
45 healthcare workers employed by 39 public hospitals located in Heilongjiang, Hebei, and Beijing  
46  
47 Provinces of China. The 39 public hospitals that served as the research settings were chosen with the  
48  
49 use of a convenience sampling method. All investigators were trained by a unified written survey  
50  
51 before they began to collect data. Qualified investigators were appointed to collect data. We obtained  
52  
53 permission from the managers, medical dispute resolution and human resources departments of the  
54  
55  
56  
57  
58  
59  
60

1  
2  
3  
4 hospitals. The investigators carried out face-to-face survey by using an anonymous, self-administered  
5  
6 questionnaire. We purposely selected 3 public hospitals of Harbin (The First Affiliated Hospital of  
7  
8 Harbin Medical University, The Second Affiliated Hospital of Harbin Medical University, The Fourth  
9  
10 Affiliated Hospital of Harbin Medical University) as a site for our pilot study site before the formal  
11  
12 investigation. A total of 150 questionnaires were distributed and recovered. A total of 3,212 healthcare  
13  
14 workers (physicians, nurses and medical technician) were investigated using a convenience sampling  
15  
16 method in the formal investigation. The researchers and hospital coordinators distributed and collected  
17  
18 questionnaires that were completed by the healthcare workers immediately. We eliminated the  
19  
20 questionnaires that existed missing data or quality problems. A total of 2,706 valid questionnaires were  
21  
22 returned, and the effective response rate was 84.25%. This study was only about physical violence, so  
23  
24 the 368 healthcare workers are suitable for research.  
25  
26  
27  
28  
29  
30

31 The inclusion criteria for participants in this study were as follows: (1) being at least one year of  
32  
33 work experience; (2) volunteered to participate; (3) would not affect their work; and (4) experienced  
34  
35 physical violence in the previous 12 months. Excluded from this study were individuals who (1) had  
36  
37 received any psychological treatment after experienced physical violence, and (2) experienced other  
38  
39 traumatic events.  
40  
41  
42  
43  
44  
45

## 46 **QUESTIONNAIRE**

### 47 **Demographic characteristics**

48  
49 Demographic characteristics including gender, age, marital status, professional title, occupation, and  
50  
51 work experience, etc.  
52  
53  
54

### 55 **Workplace Violence Scale**



1  
2  
3  
4 The Workplace Violence Scale developed by the International Labour Office, International Council of  
5  
6 Nurses, World Health Organization, and Public Services International Joint Programme on Workplace  
7  
8 Violence in the Health Sector in 2003 and revised Survey of Violence Experienced by Staff  
9  
10 (SOVES-G-R) was used to measure workplace violence.<sup>27-28</sup> We obtained permission to use this scale.

11  
12  
13  
14 The scale is divided into 2 dimensions and has 9 items. Each item is scored on a 4-point scale to reflect  
15  
16 respondents' frequency of exposure to violence (0 = 0 times, 1 = 1 time, 2 = 2–3 times, 3 =  $\geq 4$  times).  
17  
18  
19 The total possible score ranges from 0 to 27, with a higher total score indicating a higher frequency of  
20  
21 exposure to WPV. In the present study, Cronbach's  $\alpha$  for the Workplace Violence Scale was 0.86.  
22

### 23 24 **PTSD**

25  
26 The PTSD Checklist-Civilian Version (PCL-C) was used to measure PTSD symptoms of the healthcare  
27  
28 workers.<sup>29</sup> It consists of 17 self-report items and three dimensions, namely, re-experiencing (items 1–5),  
29  
30 avoidance/numbing (items 6–12) and hyper-arousal (items 13–17). The three dimensions correspond to  
31  
32 the DSM-IV symptoms criteria.<sup>2</sup> The options for each item on the PCL-C are rated from 1 (not at all) to  
33  
34 5 (extremely) based on the extent to which the respondent has been troubled by specific symptoms in  
35  
36 the past month. The total possible score is calculated by adding the scores for all items, and it ranges  
37  
38 from 17 to 85, with a higher score indicating a higher risk for PTSD symptoms. A total score  $\geq 50$  is  
39  
40 indicative of PTSD symptoms.<sup>29</sup> In this study, the traumatic event in the original PCL-C was replaced  
41  
42 by the physical violence. The reliability and validity of this instrument have been shown to be high in a  
43  
44 wide range of Chinese populations.<sup>30-32</sup> The present study revealed that Cronbach's  $\alpha$  for the PCL-C  
45  
46 was 0.934, and for the three sub-scales it was 0.872 (re-experiencing), 0.921 (avoidance/numbing), and  
47  
48 0.926 (hyper-arousal).  
49  
50  
51  
52  
53  
54

### 55 56 **Eysenck Personality Questionnaire**

1  
2  
3  
4  
5  
6  
7  
8  
9  
10  
11  
12  
13  
14  
15  
16  
17  
18  
19  
20  
21  
22  
23  
24  
25  
26  
27  
28  
29  
30  
31  
32  
33  
34  
35  
36  
37  
38  
39  
40  
41  
42  
43  
44  
45  
46  
47  
48  
49  
50  
51  
52  
53  
54  
55  
56  
57  
58  
59  
60

Personality traits were measured using the Eysenck Personality Questionnaire-Revised Short Scale for Chinese (EPQ-RSC). The EPQ-RSC consists of 48 items, categorized into 4 subscales reflecting personality traits: Extraversion, Neuroticism, Psychoticism, and Lie. Each item is scored on a dichotomous scale (1=Yes, 0=No) to measure personality characteristics. The scores of the positively and negatively worded items are summed in accordance with each personality trait. Early studies have found the EPQ-RSC to have high reliability and validity as a measure of personality traits in China.<sup>33-34</sup> The total score for the Extraversion subscale indicates introversion when it is less than 43.3, middle when it is from 43.3 to 56.7 and extraversion when it is greater than 56.7. For the Psychoticism subscale, tough-minded is defined when the total score is greater than 56.7; middle is defined when the total score is from 43.3 to 56.7, and mild is defined when the total score is less than 43.3. For the Neuroticism subscale, a total score of less than 43.3 defines emotional stability, while a total score from 43.3 to 56.7 defines middle, and a total score greater than 56.7 defines emotional instability.<sup>33</sup> For the Lie subscale, a total score for 60 or greater may indicate information provided by respondents is unreliable.<sup>33</sup> In this study, Cronbach's  $\alpha$  for the EPQ-RSC was 0.903. The internal consistency coefficients were 0.854, 0.756, 0.791, and 0.762, for the Extraversion, Neuroticism, Psychoticism, and Lie subscales, respectively.

#### **Trait Coping Style Questionnaire**

The Trait Coping Style Questionnaire (TCSQ) was used to assess participants' coping styles of life events in this study. The TCSQ consists of 20 items, including 10 items of positive coping (items 1, 3, 5, 8, 9, 11, 14, 15, 18, 20) and negative coping (items 2, 4, 6, 7, 10, 12, 13, 16, 17, 19), respectively. Each item is rated on a 5-point Likert scale. The total possible score of positive and negative coping is calculated by adding the scores for all items. Previous studies have found the TCSQ to have high

1  
2  
3 reliability and validity as a measure of coping style in China.<sup>35-36</sup> In this study, Cronbach's  $\alpha$  for the  
4  
5 total scale was 0.845, and the internal consistency coefficients of the subscales were  $\alpha=0.823$  (positive  
6  
7 coping), and  $\alpha=0.863$  (negative coping).  
8  
9

### 10 11 **Social Support Rating Scale**

12  
13 Social support was evaluated using the Chinese version of the Social Support Rating Scale (SSRS),<sup>37-38</sup>  
14  
15 which is a short measure of the social support individuals have received. This 10-item scale is divided  
16  
17 into 3 dimensions: subjective support (items 1, 3, 4, 5), objective support (items 2, 6, 7) and the  
18  
19 availability of support (items 8, 9, 10). Social support level is defined as low when the total score is  
20  
21 from 12 to 44, medium when the total score is from 45 to 54, and high when the total score is greater  
22  
23 than 55.<sup>39</sup> The present study revealed that the Cronbach's  $\alpha$  for the SSRS was 0.865, and for the three  
24  
25 subscales it was 0.884 (subjective support), 0.911 (objective support), and 0.875 (the availability of  
26  
27 support).  
28  
29  
30  
31  
32  
33  
34  
35

### 36 **DATA ANALYSIS**

37  
38 EpiData version 3.1 was used to establish the study's database. Data were double entered after  
39  
40 carefully checking and eliminating data that did not qualify for the statistical. IBM SPSS Version 19.0  
41  
42 and Excel were used for the data analysis. The normal distributions of the continuous variables were  
43  
44 verified using P-P plots and K-S tests. Descriptive statistics, including numbers (n), percentages (%),  
45  
46 means, and standard deviations (SD) were calculated for the demographic variables.. We used one-way  
47  
48 analysis of variance (ANOVA) or independent sample t-tests to compare the group differences of  
49  
50 measures of the continuous variables. The chi-square ( $\chi^2$ ) test was used to compare differences in  
51  
52 categorical variables. Pearson's correlations were used to examine correlations among continuous  
53  
54  
55  
56  
57  
58  
59  
60

variables. Hierarchical regression analysis was used to examine the associations of the demographic characteristics and scores on the SSRS, EPQ-RSC, and TCSQ with PTSD symptoms. Data including F value,  $R^2$ ,  $R^2$ -changes ( $\Delta R^2$ ), standardized regression coefficient ( $\beta$ ) and P-value for each step in the regression model were reported. All the study variables were tested for multi-collinearity. A P-value<0.05 was considered to be statistically significance.

### ETHICAL CONSIDERATIONS

Ethical approval to undertake this study was granted by the Research Ethics Committee of Harbin Medical University, and informed consent was obtained from each hospital and healthcare worker involved in the investigation. All of the participants gave the informed consent before the survey; they were assured that their personal information would be kept confidential.

### RESULTS

#### Sample demographics

The demographic characteristics of the participants are shown in Table 1. Of the 368 participants, 59.8% were women, 51.3% received an undergraduate education, and 73.9% were married. The prevalence of physical violence in the previous 12 months was 13.60%.

**Table 1. Characteristics of participants in relation to PTSD symptoms. (N=368).**

| Variables        |                         | n   | %    | PTSD     |       | F/t   | P     |
|------------------|-------------------------|-----|------|----------|-------|-------|-------|
|                  |                         |     |      | symptoms |       |       |       |
|                  |                         |     |      | Mean     | SD    |       |       |
| Gender           | Male                    | 148 | 40.2 | 44.03    | 16.19 | 3.537 | 0.000 |
|                  | Female                  | 220 | 59.8 | 38.30    | 13.71 |       |       |
| Age group        | ≤30                     | 133 | 36.1 | 38.09    | 13.36 | 2.946 | 0.054 |
|                  | 31-50                   | 216 | 58.7 | 42.01    | 15.56 |       |       |
|                  | ≥51                     | 19  | 5.2  | 42.10    | 17.80 |       |       |
| Education status | Junior college or below | 118 | 32.1 | 38.14    | 13.54 | 2.592 | 0.076 |

|                     |                           |     |      |       |       |       |       |
|---------------------|---------------------------|-----|------|-------|-------|-------|-------|
|                     | Undergraduate             | 189 | 51.3 | 42.13 | 15.46 |       |       |
|                     | Graduate                  | 61  | 16.6 | 40.64 | 15.85 |       |       |
| Marital status      | Married                   | 272 | 73.9 | 41.51 | 15.75 | 2.195 | 0.029 |
|                     | Single/ divorced/ widowed | 96  | 26.1 | 38.03 | 12.38 |       |       |
| Occupation          | Physician                 | 175 | 47.6 | 42.97 | 15.37 | 4.379 | 0.013 |
|                     | Nurse                     | 180 | 48.9 | 38.29 | 13.82 |       |       |
|                     | Medical Technician        | 13  | 3.5  | 40.69 | 21.24 |       |       |
| Technical title     | Primary                   | 145 | 39.4 | 39.56 | 13.04 | 0.576 | 0.562 |
|                     | Intermediate              | 126 | 34.2 | 41.32 | 16.21 |       |       |
|                     | Senior                    | 97  | 26.4 | 41.23 | 16.16 |       |       |
| Department          | Emergency Department      | 68  | 18.5 | 41.46 | 16.08 | 0.722 | 0.607 |
|                     | Internal Medicine         | 76  | 20.7 | 38.45 | 15.07 |       |       |
|                     | Surgery                   | 123 | 33.4 | 41.53 | 13.91 |       |       |
|                     | Obstetrics and Gynecology | 19  | 5.2  | 41.63 | 16.52 |       |       |
|                     | Pediatrics                | 27  | 7.3  | 37.63 | 10.37 |       |       |
|                     | Other                     | 55  | 14.9 | 41.55 | 17.28 |       |       |
| Years of experience | ≤4                        | 101 | 27.4 | 37.19 | 13.25 | 2.158 | 0.063 |
|                     | 5-10                      | 120 | 32.6 | 42.13 | 14.52 |       |       |
|                     | 11-20                     | 87  | 23.7 | 41.90 | 16.80 |       |       |
|                     | ≥21                       | 60  | 16.3 | 41.42 | 15.46 |       |       |
| Social support      | Low                       | 224 | 60.9 | 42.41 | 15.06 | 5.904 | 0.003 |
|                     | Medium                    | 130 | 35.3 | 38.52 | 14.40 |       |       |
|                     | High                      | 14  | 3.8  | 31.00 | 14.53 |       |       |
| Extraversion        | Introversion              | 102 | 27.7 | 39.45 | 13.35 | 1.278 | 0.280 |
|                     | Middle                    | 164 | 44.6 | 41.99 | 16.04 |       |       |
|                     | Extraversion              | 102 | 27.7 | 39.51 | 14.80 |       |       |
| Psychoticism        | Mild                      | 68  | 18.5 | 42.22 | 16.87 | 0.998 | 0.370 |
|                     | Middle                    | 213 | 57.9 | 40.79 | 15.24 |       |       |
|                     | Tough-minded              | 87  | 23.6 | 38.86 | 12.69 |       |       |
| Neuroticism         | Emotional instability     | 100 | 27.2 | 40.33 | 13.80 | 0.530 | 0.589 |
|                     | Middle                    | 153 | 41.6 | 41.50 | 16.72 |       |       |
|                     | Emotional stability       | 115 | 31.2 | 39.63 | 13.60 |       |       |

### The prevalence of PTSD

The PTSD symptoms based on participants' PCL-C scores are summarized in Table 2. According to their scores on the PCL-C, 187 participants (28.0%) showed PTSD symptoms. The participants (21.2%) were considered to be at risk for later developing PTSD.

According to the DSM IV-TR criteria for PTSD,<sup>2</sup> most of the participants did not appear to be have PTSD symptoms. The criterion for PTSD that was the most frequently observed in the physical

violence group was re-experiencing. The criterion for PTSD that was the least frequently happening criterion for PTSD observed in the physical violence group was avoidance.

**Table 2. Sample description and prevalence of PTSD symptoms.**

| PTSD symptoms                                           | Physical violence |      |
|---------------------------------------------------------|-------------------|------|
|                                                         | n                 | %    |
| <b>PTSD symptoms based on PCL-C scores</b>              |                   |      |
| No obvious PTSD symptoms (17-37)                        | 187               | 50.8 |
| Criteria met for potential risk of PTSD symptoms(38-49) | 78                | 21.2 |
| Criteria met for PTSD symptoms(50-85)                   | 103               | 28.0 |
| <b>PTSD symptoms based on PTSD criterion*</b>           |                   |      |
| No criterion manifestation                              | 173               | 47.0 |
| Re-experiencing (Criterion B)                           | 166               | 45.1 |
| Avoidance (Criterion C)                                 | 129               | 35.1 |
| Hyper-arousal (Criterion D)                             | 139               | 37.8 |

Note. PTSD = posttraumatic stress disorder; PCL-C = PTSD Checklist Version.

\* Participants may have more than one criteria.

#### The correlations of the EPQ-RSC, TCSQ and SSRS scores with PTSD symptoms

Table 3 shows the correlations among the participants' PTSD symptoms and scores on the EPQ-RSC, TCSQ, and SSRS. The mean score for PTSD symptoms on the PCL-C was 40.60 (SD = 15.00). The mean score for the SSRS was 41.73 (SD = 8.44). The mean score for positive coping and negative coping was 30.05 (SD = 7.22) and 26.92 (SD = 7.33). As expected, the level of PTSD symptoms was negatively correlated with their scores on the SSRS ( $r = -0.188$ ,  $P = 0.000$ ) and positive coping of TCSQ ( $r = -0.164$ ,  $P = 0.002$ ), respectively. The level of PTSD symptoms was positively correlated with participants' scores on the to negative coping of TCSQ ( $r = 0.188$ ,  $P = 0.000$ ).

**Table 3. Pearson correlations among PTSD symptoms, EPQ-RSC, TCSQ and SSRS.**

| Variables                  | 1        | 2        | 3      | 4     | 5      | 6       |
|----------------------------|----------|----------|--------|-------|--------|---------|
| 1. PTSD symptoms           | -        |          |        |       |        |         |
| 2. SSRS                    | -0.188** | -        |        |       |        |         |
| 3. Positive coping of TCSQ | -0.164** | 0.101    | -      |       |        |         |
| 4. Negative coping of TCSQ | 0.188**  | -0.310** | 0.123* | -     |        |         |
| 5. Extraversion            | -0.007   | -0.045   | -0.036 | 0.015 | -      |         |
| 6. Psychoticism            | 0.057    | 0.017    | 0.023  | 0.043 | -0.023 | -       |
| 7. Neuroticism             | 0.027    | 0.025    | 0.007  | 0.035 | -0.091 | 0.199** |

\* $P < 0.05$ , \*\* $P < 0.01$

### Hierarchical regression analysis of related factors of PTSD symptoms

The results of the hierarchical regression analysis of the variables are presented in Table 4. Variables that had a statistically significant association with PTSD were used as control variables. Gender had a significant effect on PTSD symptoms in the model (Block 1). As shown in Block 2, social support was negatively associated with PTSD symptoms ( $\beta = -0.211$ ,  $P = 0.018$ ). On the other hand, negative coping of TCSQ was positively associated with PTSD symptoms in the regression model ( $\beta = 0.176$ ,  $P = 0.001$ ). As shown in Block 3, Psychoticism of EPQ-RSC was positively associated with PTSD symptoms in the regression model ( $\beta = 0.054$ ,  $P = 0.014$ ). Further, gender had a significant effect on PTSD symptoms, and men were more vulnerable to PTSD symptoms than women (Table 1). Therefore, we explored the potential correlates of PTSD symptoms in men and women, respectively (Table 5). As shown in Block 2, in women, positive coping of TCSQ was significantly associated with PTSD symptoms ( $\beta = -0.229$ ,  $P = 0.001$ ). However, the effect of positive coping of TCSQ was not significant in men.

**Table 4. Hierarchical regression for exploring the positive correlates of PTSD symptoms.**

| Variables               | Block 1 ( $\beta$ ) | Block 2 ( $\beta$ ) | Block 3 ( $\beta$ ) |
|-------------------------|---------------------|---------------------|---------------------|
| Gender                  | 0.153**             | 0.132*              | 0.137*              |
| Marital status          | -0.059              | -0.117*             | -0.088              |
| Occupation              | -0.048              | -0.044              | -0.072              |
| SSRS                    |                     | -0.211**            | -0.129*             |
| Positive coping of TCSQ |                     | -0.182**            | -0.181**            |
| Negative coping of TCSQ |                     | 0.176**             | 0.179**             |
| Extraversion            |                     |                     | -0.023              |
| Psychoticism            |                     |                     | 0.154*              |
| Neuroticism             |                     |                     | 0.022*              |
| <i>F</i>                | 5.189**             | 12.533**            | 16.263**            |
| <i>R</i> <sup>2</sup>   | 0.041               | 0.131               | 0.236               |
| $\Delta R^2$            | 0.041               | 0.090**             | 0.105**             |

\* $P < 0.05$ , \*\* $P < 0.01$

**Table 5. Hierarchical regression for exploring the correlates of PTSD symptoms in men and women, respectively.**

|         | Variables               | Mean (SD)     | Block 1 ( $\beta$ ) | Block 2 ( $\beta$ ) |
|---------|-------------------------|---------------|---------------------|---------------------|
| Male    |                         |               |                     |                     |
| n = 148 | SSRS                    | 41.25 (9.32)  | -0.158              | -0.159              |
|         | Positive coping of TCSQ | 30.75 (7.28)  | -0.152              | -0.158              |
|         | Negative coping of TCSQ | 27.21 (6.61)  |                     | 0.208*              |
|         | Extraversion            | 49.18 (10.04) |                     | 0.070               |
|         | Psychoticism            | 50.02 (8.62)  |                     | -0.135              |
|         | Neuroticism             | 49.99 (10.59) |                     | -0.032              |
|         | <i>F</i>                |               | 5.501               | 9.523               |
|         | <i>R</i> <sup>2</sup>   |               | 0.103               | 0.231               |
|         | $\Delta R^2$            |               | 0.103               | 0.128               |
| Female  |                         |               |                     |                     |
| n = 220 | SSRS                    | 42.05 (7.79)  | -0.059              | -0.064              |
|         | Positive coping of TCSQ | 29.58 (7.16)  | -0.229**            | -0.229**            |
|         | Negative coping of TCSQ | 26.72 (7.78)  | 0.167*              | 0.168*              |
|         | Extraversion            | 50.03 (10.54) |                     | -0.094              |
|         | Psychoticism            | 50.14 (10.56) |                     | 0.000               |
|         | Neuroticism             | 50.12 (10.20) |                     | -0.003              |
|         | <i>F</i>                |               | 6.726               | 10.681              |
|         | <i>R</i> <sup>2</sup>   |               | 0.085               | 0.194               |
|         | $\Delta R^2$            |               | 0.085               | 0.109*              |

\* $P < 0.05$ , \*\* $P < 0.01$ **DISCUSSION**

In this cross-sectional hospital-based study of healthcare workers exposed to physical violence, we assessed the prevalence and correlates of PTSD symptoms. Our study found that the prevalence of physical violence was about 13.6% in the previous year. PTSD symptoms were reported by 28.0% of the healthcare workers based on the scoring instructions of the PCL-C (i.e., 28.0% scored 50 points and above). We selected the PCL-C score of 50 and above as the standard cut-off due to the influence of traditional Chinese culture on the frequency of healthcare workers' encounters with traumatic events, and the DSM IV-TR criteria for PTSD.<sup>2</sup> Previous studies have provided valuable information regarding the prevalence of PTSD symptoms.<sup>17 40-41</sup> The prevalence of PTSD symptoms in our sample was higher than that of general population (8%) in the USA.<sup>42</sup> This finding might be attributed to the fact



1  
2  
3  
4 that the general population's exposure to traumatic events is less than that of healthcare workers.  
5  
6 Similarly, intensive care unit nurses experience traumatic events more often than other healthcare  
7  
8 workers do.<sup>18</sup>  
9

10  
11 Our study found that 21.2% of the healthcare workers might develop PTSD symptoms and 28.0%  
12  
13 of the healthcare workers appeared PTSD symptoms after experiencing physical violence. This  
14  
15 phenomenon revealed that physical violence had a strong influence on the mental health of the  
16  
17 healthcare workers. Approximately 53.0% (195/368) of the participants reported having at least one  
18  
19 PTSD criterion. The PTSD symptoms that was the most commonly observed was re-experiencing,  
20  
21 followed by hyper-arousal, and then avoidance. A previous study also reported that the healthcare  
22  
23 workers of emergency department were the direct victims of workplace violence because they reported  
24  
25 re-experiencing the violent event, followed by hyper-arousal, and avoidance.<sup>17</sup> This finding might  
26  
27 reflect the normal stress response of healthcare workers and support the notion that some healthcare  
28  
29 workers might benefit from relaxation training and psychological interventions by professionals. The  
30  
31 symptoms of hyper-arousal (37.8%) and re-experiencing (45.1%) were reported by participants after  
32  
33 experiencing physical violence. Previous studies revealed that re-experiencing and hyper-arousal the  
34  
35 violence incident was significantly and negatively associated with emergency department workers'  
36  
37 ability to accomplish their work.<sup>17 43</sup> Approximately 47.0% of the sample reported no symptoms  
38  
39 manifestation after experiencing physical violence. This phenomenon might be related to hospital  
40  
41 culture, which requires healthcare workers to be able to shift their focus quickly and constantly.  
42  
43 Healthcare workers who escaped slight injury during an episode of physical violence had to shift their  
44  
45 rapidly focus to another patient after the event.  
46  
47  
48  
49  
50  
51  
52  
53  
54

55  
56 As shown in results of the Pearson's correlations and hierarchical regression analysis, social  
57  
58  
59  
60

1  
2  
3  
4 support had a significant negative association with PTSD symptoms, and this finding is consistent with  
5  
6 other research.<sup>10 24 32 36</sup> A supportive environment can help individuals cope with all kinds of stressful  
7  
8 events, and serve as a buffer against their negative health effects. Social support might be especially  
9  
10 important for healthcare workers; because of the unique aspects of their jobs, they need support from  
11  
12 patients, colleagues, friends and relatives. In addition, a significant effect of coping styles on PTSD  
13  
14 symptoms was found in the present study. This result indicated that when healthcare workers  
15  
16 encountered a traumatic event, a negative coping was more likely to increase their proneness to  
17  
18 developing PTSD symptoms. In contrast, positive coping was beneficial to prevent or alleviate PTSD  
19  
20 symptoms. Surprisingly, introverted and stable personalities were negatively associated with PTSD  
21  
22 symptoms. One possible reason is that a balanced disposition i.e., one that is intermediate between  
23  
24 extroversion and introversion is more conducive to the psychological health of healthcare workers.  
25  
26 Meanwhile, emotional instability and characteristics of an tough-minded personality were risk factors  
27  
28 for developing PTSD symptoms. This personality is not conducive to communication with people,  
29  
30 thereby increasing the person's vulnerability.<sup>44</sup>  
31  
32  
33  
34  
35  
36  
37  
38

39 An important finding of the present study was revealed in the univariate analyses. We found that  
40  
41 the men exposed to traumatic events were more likely to exhibit PTSD symptoms than the women  
42  
43 were. This result was different from the findings of earlier studies that women are more likely to  
44  
45 develop PTSD symptoms.<sup>6 17 19</sup> This might be attributed to gender differences in coping styles and social  
46  
47 support. This phenomenon also may be attributable to the fact that the severity of injury after  
48  
49 experiencing physical violence in men was higher than women. Women were likely to get more social  
50  
51 support than men after experiencing physical violence, and it may be that women were often regarded  
52  
53 as vulnerable groups. We also found that men were more likely to respond negatively to traumatic  
54  
55  
56  
57  
58  
59  
60

1  
2  
3  
4 events. These findings suggest that social support, coping styles, whether a person was exposed to  
5  
6 physical violence, emotional instability, and anxious personality is closely related to PTSD symptoms.  
7  
8  
9 Therefore, it is necessary to implement interventions, For example, specialized or routine psychological  
10  
11 interventions should be developed by a clinical psychologist, and hospitals could provide  
12  
13 violence-related training for healthcare workers and provide psychological support or a “debriefing  
14  
15 room.”<sup>45</sup> These interventions should help to in reduce PTSD symptoms.  
16  
17

18  
19 There are several limitations of the present study. First, we used the PCL-C to assess PTSD  
20  
21 symptoms rather than a standard clinical diagnostic method. Consequently, the prevalence of PTSD  
22  
23 might be overestimated. Second, the findings need to be confirmed in a longitudinal study. Finally, our  
24  
25 results are specific to Chinese healthcare workers exposed to physical violence in the past 12-month.  
26  
27  
28 Thus, the inclusion of additional careers and a larger sample size should contribute to the validity the  
29  
30 results of future studies.  
31  
32

### 33 34 35 36 **CONCLUSIONS**

37  
38 Healthcare workers who have experienced physical violence are more likely to develop PTSD  
39  
40 symptoms. The positive effects of social support on PTSD symptoms suggest that organizational and  
41  
42 familial support have practical implications for psychological interventions to promote health.  
43  
44 Furthermore, the personalities and coping styles of the healthcare workers have influenced the  
45  
46 development of PTSD symptoms. It is imperative to keep positive coping and get social support after  
47  
48 experiencing traumatic events.  
49  
50  
51  
52

### 53 54 55 56 **Acknowledgments**

1  
2  
3  
4 The authors thank all the healthcare workers, managers and Chinese Hospital Association for their  
5  
6 assistance and support for this project.  
7

#### 8 **Author Contributions**

9  
10 LS and LF designed the study. LS, LW, XJ, BP and LF collected data. ZL, LW, XJ, HM, XL and AL  
11  
12 analysed the data. LS and LF drafted the manuscript. LS, ZL and LF revised the manuscript.  
13  
14

#### 15 **Funding**

16  
17 This study was funded by the National Natural Science Foundation of China, grant number 71473063.  
18  
19

20  
21 **Competing interests** None declared.  
22

23  
24 **Data sharing statement** No additional data are available.  
25  
26

#### 27 **REFERENCES**

- 28  
29  
30  
31 1. Guo W, Xue JM, Shao D, *et al*. Effect of the interplay between trauma severity and trait  
32  
33 neuroticism on posttraumatic stress disorder symptoms among adolescents exposed to a pipeline  
34  
35 explosion. *PLoS One* 2015;10(3):e0120493.  
36  
37  
38 2. Association AP. Diagnostic and Statistical Manual of Mental Disorders fourth edition, Text  
39  
40 revision (DSM-IV TR). 2000.  
41  
42  
43 3. Andreasen NC. What is post-traumatic stress disorder? *Dialogues Clin Neurosci* 2011;13:240–  
44  
45 243.  
46  
47  
48 4. Van Der Kolk BA. The psychobiology and psychopharmacology of PTSD. *Hum Psychopharmacol*  
49  
50 2001;16(S1):S49 – S64.  
51  
52  
53 5. Shalev AY. Post-traumatic stress disorder. Disorder takes away human dignity and character. *BMJ*  
54  
55 2001;322(7297):1301–1304.  
56  
57  
58  
59  
60

- 1  
2  
3  
4 6. Hu BS, Liang YX. Post-traumatic stress disorder. *Journal of Environmental Hygiene* 1997;(5):  
5  
6 266-269.  
7
- 8  
9 7. Klein S, Alexander DA. Epidemiology and presentation of post-traumatic disorders.  
10  
11 *Psychiatry-interpersonal & Biological Processes* 2009;8(8):282-287.  
12
- 13  
14 8. Wang YL, Xie W, Yang ZH, *et al.* Research progress of posttraumatic stress disorder in China.  
15  
16 *Chinese Journal of Applied Psychology* 2005;11(2):176-180.  
17
- 18  
19 9. Brewin CR, Andrews B, Valentine JD. Meta-analysis of risk factors for posttraumatic stress  
20  
21 disorder in trauma exposed adults. *J Consult Clin Psycho* 2000;68(5):748-766.  
22
- 23  
24 10. Fan F, Zhang Y, Yang Y, *et al.* Symptoms of posttraumatic stress disorder, depression, and  
25  
26 anxiety among adolescents following the 2008 Wenchuan earthquake in China. *J Trauma Stress*  
27  
28 2011;24(1): 44-53.  
29
- 30  
31 11. Boe HJ, Holgersen KH, Holen A. Mental health outcomes and predictors of chronic disorders  
32  
33 after the North Sea oil rig disaster: 27-year longitudinal follow-up study. *J Nerv Ment Dis*  
34  
35 2011;199(1):49-54.  
36
- 37  
38 12. van der PE, Kleber RJ. Acute and chronic job stressors among ambulance personnel: predictors of  
39  
40 health symptoms. *Occup Environ Med* 2003;60:i40-6.  
41
- 42  
43 13. Hashmi S, Petraro P, Rizzo T, *et al.* Symptoms of anxiety, depression, and posttraumatic stress  
44  
45 among survivors of the 2005 Pakistani earthquake. *Disaster Medicine and Public Health*  
46  
47 *Preparedness* 2011;5(4):293.  
48
- 49  
50 14. van Griensven F, Chakkraband ML, Thienkrua W, *et al.* Mental health problems among adults in  
51  
52 tsunami-affected areas in southern Thailand. *JAMA* 2006;296(5):537-548.  
53
- 54  
55 15. Ahmad M, Al-Rimawi R, Masadeh A, *et al.* Workplace Violence by Patients and their Families  
56  
57  
58  
59  
60

- 1  
2  
3  
4  
5  
6  
7  
8  
9  
10  
11  
12  
13  
14  
15  
16  
17  
18  
19  
20  
21  
22  
23  
24  
25  
26  
27  
28  
29  
30  
31  
32  
33  
34  
35  
36  
37  
38  
39  
40  
41  
42  
43  
44  
45  
46  
47  
48  
49  
50  
51  
52  
53  
54  
55  
56  
57  
58  
59  
60
- against Nurses: Literature Review. *INT J NURS TERMIN CL* 2015;2(4):46-55.
16. Ramacciati N, Ceccagnoli A, Addey B. Violence against nurses in the triage area: An Italian qualitative study. *International Emergency Nursing*, 2015;23(4):274-280.
17. Laposa JM, Alden LE. Posttraumatic stress disorder in the emergency room: exploration of a cognitive model. *Behav Res Ther* 2003;41(1):49-65.
18. Mills LD, Mills TJ. Symptoms of post-traumatic stress disorder among emergency medicine residents. *J Emerg Med* 2005;28(1):1-4.
19. Friedman, MJ, Resick, PA, Bryant, R.A, *et al.* Considering PTSD for DSM-5. *Depression and Anxiety* 2011;28(9):750-769.
20. Kornblith AB, Herndon JE, Weiss RB, *et al.* Long-term adjustment of survivors of early-stage breast carcinoma, 20 years after adjuvant chemotherapy. *Cancer* 2003;98(4):679-689.
21. Rourke MT, Hobbie WL, Schwartz L, *et al.* Posttraumatic stress disorder (PTSD) in young adult survivors of childhood cancer. *Pediatr Blood Cancer* 2007; 49(2): 177-82.
22. Perrin M, Vandeleur CL, Castelao E, *et al.* Determinants of the development of post-traumatic stress disorder, in the general population. *Soc Psychiatry Psychiatr Epidemiol* 2014; 49(3): 447-457.
23. Holbrook TL, Hoyt DB, Stein MB, *et al.* Gender differences in long-term post-traumatic stress disorder outcomes after major trauma: women are at higher risk of adverse outcomes than men. *J Trauma* 2002; 53(5):882-888.
24. Yuemei X, Fenglin C. Post-traumatic stress disorder symptoms and its relation with Quality of life in Ambulance Nurses of Linyi. *Shandong University Master's Thesis* 2010.
25. Lulu C, Min L. Related investigation on Post Traumatic Stress Disorder, Mental Health,

- 1  
2  
3  
4 Resilience, Personality and Coping Style of Gynecologic Cancer Patients. *Third Military*  
5  
6 *Medical University*2012.  
7  
8  
9 26. Chengqi L, Guorui L. A study on the relationship between College Students' attribution style  
10  
11 and their mental health. *East China Normal University* 2004.  
12  
13  
14 27. ILO/ICN/WHO/PSI. Framework Guidelines for Addressing Workplace Violence in the Health  
15  
16 Sector. Geneva: ILO/ICN/WHO/PSI Joint Programme on Workplace Violence in the Health  
17  
18 Sector; 2002.  
19  
20  
21 28. Zampieron A, Galeazzo M, Turra S, *et al.* Perceived aggression towards nurses: study in two  
22  
23 Italian health institutions. *J Clin Nurs* 2010;19:2329–41.  
24  
25  
26 29. Weathers FW, Litz BT, Herman DS, *et al.* The PTSD Checklist (PCL):Reliability, validity,and  
27  
28 diagnostic utility. Annual convention of the International Society for Traumatic Stress Studies.  
29  
30 *San Antonio TX*; 1993.  
31  
32  
33 30. Zhang Z, Shi Z, Wang L, *et al.* Post-traumatic stress disorder, anxiety and depression among the  
34  
35 elderly: a survey of the hard-hit areas a year after the Wenchuan earthquake. *Stress Health* 2012;  
36  
37 28(1):61-68.  
38  
39  
40 31. Wu Z, Xu J, Sui Y. Posttraumatic stress disorder and posttraumatic growth coexistence and the  
41  
42 risk factors in Wenchuan earthquake survivors. *Psychiatry Res* 2016; 237:49-54.  
43  
44  
45 32. Li L, Yang Y L, Wang Z Y, *et al.* Prevalence and Positive Correlates of Posttraumatic Stress  
46  
47 Disorder Symptoms among Chinese Patients with Hematological Malignancies: A Cross-  
48  
49 Sectional Study. *Plos One* 2015;10(12):e0145103.  
50  
51  
52 33. Cui Y, Tian SS, Qiao N, *et al.* Associations of Individual-Related and Job-Related Risk Factors  
53  
54 with Nonfatal Occupational Injury in the Coal Workers of Shanxi Province: A Cross-Sectional  
55  
56  
57  
58  
59  
60

- 1  
2  
3  
4 Study. *PLoS One* 2015;10(7):e0134367.
- 5  
6 34. Qian M, Wu G, Zhu R, *et al.* Development of the revised Eysenck Personality Questionnaire  
7  
8 Short Scale for Chinese (EPQ-RSC). *Acta Psychologica Sinica* 2000;32(3):317-323.
- 9  
10  
11 35. Zhang L, Zhang J X, Wen-Juan X U, *et al.* An evaluation of validity and reliability on the trait  
12  
13 coping style questionnaire(TCSQ) using for Chinese soldier. *Chinese Journal of Disease*  
14  
15 *Control & Prevention*2010.
- 16  
17  
18 36. Zhao Q, Wenjuan X U, Jing L U, *et al.* Study on the relationship between the trait coping style  
19  
20 and the quality of life of soldiers in Xinjiang area.*Journal of Shanxi Medical University*2012.
- 21  
22  
23 37. Feng S, Tan H, Benjamin A, *et al.* Social support and posttraumatic stress disorder among flood  
24  
25 victims in Hunan, China. *Ann Epidemiol.* 2007;17(10):827-833.
- 26  
27  
28 38. Li H, Yan C, Zhu S, *et al.* Correlation among coping style, social support, and negative emotion  
29  
30 in infertile women. *Zhong nan da xue xue bao. Yi xue ban = Journal of Central South*  
31  
32 *University. Medical sciences* 2011;36(2):138-142.
- 33  
34  
35 39. Chang-Fei L U, Jia C X, Zhang J Y, *et al.* Reliability and validity of Social Support Rating Scale  
36  
37 in rural suicides. *Chinese Mental Health Journal* 2011;25(3):218-222.
- 38  
39  
40 40. Zafar W, Khan UR, Siddiqui SA,*et al.* Workplace Violence and Self-reported Psychological  
41  
42 Health: Coping with Post-traumatic Stress, Mental Distress, and Burnout among Physicians  
43  
44 Working in the Emergency Departments Compared to Other Specialties in Pakistan.*J Emerg*  
45  
46 *Med* 2015;50(1):167-177.
- 47  
48  
49 41. Johansen VA, Eilertsen DE, Nordanger D, Weisaeth L. Prevalence, comorbidity and stability of  
50  
51 post-traumatic stress disorder and anxiety and depression symptoms after exposure to physical  
52  
53 assault: an 8-year prospective longitudinal study. *Nord J Psychiatry*2013; 67(1):69-80.
- 54  
55  
56  
57  
58  
59  
60



- 1  
2  
3  
4 42. Breslau N. The epidemiology of post-traumatic stress disorder; what is the extent of the problem?  
5  
6 *Journal of Clinical Psychiatric* 2001;62:16-22.  
7  
8  
9 43. Alden LE, Regambal MJ, Laposa JM. The effects of direct versus witnessed threat on emergency  
10  
11 department healthcare workers: Implications for PTSD criterion A. *J Anxiety Disord*2008;22(8):  
12  
13 1337-1346.  
14  
15  
16 44. O'Leary M M, Taylor J, Eckel L. Psychopathic personality traits and cortisol response to stress:  
17  
18 the role of sex, type of stressor, and menstrual phase.*Hormones & Behavior* 2017;58(2):250-256.  
19  
20  
21 45. Cheung T, Yip PSF. Depression, anxiety and symptoms of stress among Hong Kong nurses: a  
22  
23 cross-sectional study. *Inter J Env Res Pub Heal* 2015;12(9):11072-11100.  
24  
25  
26  
27  
28  
29  
30  
31  
32  
33  
34  
35  
36  
37  
38  
39  
40  
41  
42  
43  
44  
45  
46  
47  
48  
49  
50  
51  
52  
53  
54  
55  
56  
57  
58  
59  
60

## 1. the National Natural Science Foundation of China, grant number71473063

# 国家自然科学基金委员会 项目批准通知

国科金计项〔2014〕44号

## 关于批准资助2014年度第二批项目的通知

哈尔滨医科大学（单号：2014-44-0330）：

根据《国家自然科学基金条例》有关规定和专家评审意见，国家自然科学基金委员会（以下简称自然科学基金委）决定批准资助你单位2014年度（第2批）国家自然科学基金项目 125 项，金额 5902.0 万元。其中，面上项目 51 项，重点项目 2 项，青年科学基金项目 72 项，上述资助项目清单详见附件。

自评审结果通告发布之日起25日内，项目负责人须按要求填写与提交《国家自然科学基金资助项目计划书》（以下简称计划书）电子版。2014年9月11日16点前，依托单位将审核后的计划书电子版通过科学基金网络信息系统（<https://isis.nsf.gov.cn>）提交至自然科学基金委。自然科学基金委同期对计划书电子版进行审核。审核通过的，项目负责人可打印计划书纸质版（建议双面打印）；审核未通过的，退回至项目负责人修改，依托单位须在2014年9月18日16点前，将修改后的计划书电子版及时审核并再次提交至自然科学基金委。2014年9月26日16点前，依托单位须将自然科学基金委审核通过后的计划书纸质版（一式两份，应保证与电子版一致）加盖单位公章，报送至自然科学基金委项目材料接收工作组。采用邮寄方式的，请在截止日前（以发信



1  
2  
3  
4  
5  
6  
7  
8  
9  
10  
11  
12  
13  
14  
15  
16  
17  
18  
19  
20  
21  
22  
23  
24  
25  
26  
27  
28  
29  
30  
31  
32  
33  
34  
35  
36  
37  
38  
39  
40  
41  
42  
43  
44  
45  
46  
47  
48  
49  
50  
51  
52  
53  
54  
55  
56  
57  
58  
59  
60

邮戳日期为准)以快递方式邮寄,并在信封左下角注明“计划书”。请勿使用包裹,以免延误报送。报送计划书材料时,还应包括本单位报送计划书的公函和计划书清单。材料不完整不予接收。

如在规定期限内未提交电子与纸质计划书且未说明理由的,视为自动放弃接受资助。

邮寄地址:北京市海淀区双清路83号项目材料接收工作组

邮编:100085

联系电话:010-62328591

附件:2014年度国家自然科学基金资助项目清单

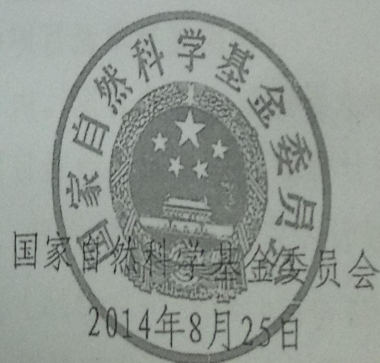



## 2014年国家自然科学基金资助项目清单 (哈尔滨医科大学)

单号: 2014-44-0330

资助金额单位: 万元

| 序号 | 项目批准号    | 负责人 | 申请代码    | 项目名称                                 | 资助金额 | 起止日期                  | 资助类别/亚类说明/附注说明 |
|----|----------|-----|---------|--------------------------------------|------|-----------------------|----------------|
| 12 | 61403112 | 刘洪波 | F030406 | 基于高通量组学数据的干细胞多能性相关DNA甲基化调控元件识别及其功能分析 | 25   | 2015.01.01-2017.12.31 | 青年科学基金项目       |
| 13 | 61473106 | 李霞  | F030407 | 癌症非编码miRNA-lncRNA协同调控网络重构与功能特性研究     | 82   | 2015.01.01-2018.12.31 | 面上项目/常规面上项目    |
| 14 | 71403071 | 孙涛  | G0308   | 基于生态理论视角下区域医疗联合体生态系统健康评价建模与实证研究      | 23   | 2015.01.01-2017.12.31 | 青年科学基金项目       |
| 15 | 71403072 | 王月枫 | G0308   | 社区高血压患者急症风险预测模型构建及预见性干预与救护管理体系的研究    | 20   | 2015.01.01-2017.12.31 | 青年科学基金项目       |
| 16 | 71403073 | 李叶  | G0308   | 基于CHE方法学比较分析的医保制度经济保护能力影响因素研究        | 23   | 2015.01.01-2017.12.31 | 青年科学基金项目       |
| 17 | 71403074 | 尹慧  | G0308   | 基于结构方程的社区心血管疾病的社会决定因素模型构建及分层干预效果评价   | 20   | 2015.01.01-2017.12.31 | 青年科学基金项目       |
| 18 | 71473063 | 樊立华 | G0308   | 医护人员遭受医院场所暴力PTSD及对职场行为影响机制研究         | 63   | 2015.01.01-2018.12.31 | 面上项目/常规面上项目    |
| 19 | 71473064 | 焦明丽 | G0308   | 基于DEMATTEL法与“硬留理论”的医院暴力影响因素及对策研究     | 60   | 2015.01.01-2018.12.31 | 面上项目/常规面上项目    |
| 20 | 71473065 | 宁宁  | G0308   | 面向公共卫生突发事件的城市社区抗逆力理论、方法及策略研究         | 63   | 2015.01.01-2018.12.31 | 面上项目/常规面上项目    |
| 21 | 81400097 | 高春艳 | H0811   | 血管内皮细胞清除活化和凋亡的血小板调控血管形成的作用与机制        | 23   | 2015.01.01-2017.12.31 | 青年科学基金项目       |
| 22 | 81400115 | 付玥玥 | H0812   | APL分化综合值mRNA标记筛选及功能分析                | 23   | 2015.01.01-2017.12.31 | 青年科学基金项目       |

第2页 / 共12页

2. Ethical Approval:

哈尔滨医科大学公共卫生学院医学伦理审查申请表

|                                                                                              |                                                                                      |
|----------------------------------------------------------------------------------------------|--------------------------------------------------------------------------------------|
| 项目名称: 医护人员遭受医院暴力 PTSD 及对职场行为影响机制研究                                                           |                                                                                      |
| 项目负责人: 樊立华                                                                                   | 职称: 教授                                                                               |
| 电话: 13136661393                                                                              | 电子信箱: lihuafan@126.com                                                               |
| 所在单位: 哈尔滨医科大学公共卫生学院                                                                          |                                                                                      |
| 单位伦理委员会意见:                                                                                   |                                                                                      |
| <p>按照国家、省有关部门医学伦理审查的规定和程序, 哈尔滨医科大学公共卫生学院医学伦理委员会对本申请的项目审查结论为: 研究项目所涉及的医学伦理内容和实施的解决方案符合要求。</p> |                                                                                      |
| 伦理委员会成员签字:                                                                                   |                                                                                      |
| 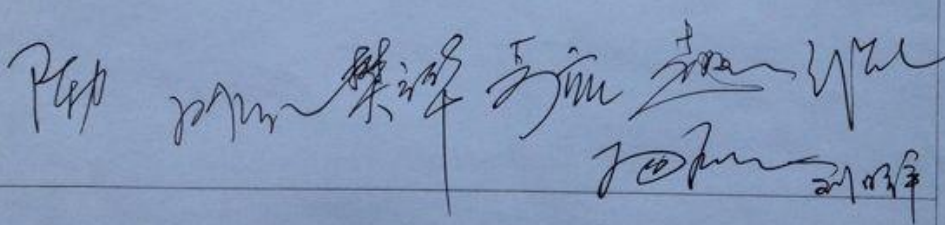         |                                                                                      |
| 伦理委员会主任签字:                                                                                   | 单位伦理委员会公章:                                                                           |
|           |  |
|                                                                                              | 2014年3月1日                                                                            |



Checklist of *cross-sectional studies*

|                                                    | Page number, line number     |
|----------------------------------------------------|------------------------------|
| <b>Title</b>                                       | 1, 4-6                       |
| <b>Abstract</b>                                    | 2, 4-57; 3, 32               |
| <b>Strengths and limitations of this study</b>     | 3, 37-57                     |
| <b>Introduction</b>                                |                              |
| Background                                         | 4, 4-57; 5, 4-34             |
| Objectives                                         | 5, 16-24                     |
| <b>Methods</b>                                     |                              |
| Study design                                       | 5, 39-57; 6, 4-42            |
| Setting                                            | 5, 52-57; 6, 4-19            |
| Participants                                       | 6, 31-42                     |
| Questionnaire                                      | 6, 47-57; 7; 8; 9, 4-32      |
| Data measurement                                   | 9, 36-57; 10, 4-14           |
| Study size                                         | 6, 24-29                     |
| Quantitative variables                             | 7, 47-57                     |
| Ethical considerations                             | 10, 19-29                    |
| <b>Results</b>                                     |                              |
| Participants                                       | 10, 36-44                    |
| Descriptive data                                   | 10, 36-58; 11, 3-43          |
| Outcome data                                       | 12                           |
| Main results                                       | 11; 12;13;14                 |
| Other analyses                                     | 16, 37-53; 17,3-32           |
| <b>Discussion</b>                                  |                              |
| Key results                                        | 14,38-57; 15, 4-56           |
| Interpretation                                     | 16, 3-32; 17, 9-57           |
| Discuss the external validity of the study results | 17, 19-31                    |
| <b>Conclusions</b>                                 | 17, 36-52                    |
| <b>Other information</b>                           |                              |
| Acknowledgements                                   | 18, 4-6                      |
| Contributors                                       | 18, 9-14                     |
| Funding                                            | 18, 16-19                    |
| Competing interests                                | 18, 21                       |
| <b>References</b>                                  | 18, 29-57; 20; 21; 22; 23;24 |

# BMJ Open

## Prevalence and correlates of symptoms of post-traumatic stress disorder among Chinese healthcare workers exposed to physical violence: a cross-sectional study

|                                 |                                                                                                                                                                                                                                                                                    |
|---------------------------------|------------------------------------------------------------------------------------------------------------------------------------------------------------------------------------------------------------------------------------------------------------------------------------|
| Journal:                        | <i>BMJ Open</i>                                                                                                                                                                                                                                                                    |
| Manuscript ID                   | bmjopen-2017-016810.R1                                                                                                                                                                                                                                                             |
| Article Type:                   | Research                                                                                                                                                                                                                                                                           |
| Date Submitted by the Author:   | 13-May-2017                                                                                                                                                                                                                                                                        |
| Complete List of Authors:       | Shi, Lei<br>Wang, Lingling ; Chinese Hospital Association, Department of Autonomous Protection<br>Jia, Xiaoli<br>Li, Zhe<br>Mu, Huitong<br>Liu, Xin<br>Peng, Boshi<br>Li, Anqi<br>Fan, Lihua; Harbin Medical University, Department of Health Management , School of Public Health |
| <b>Primary Subject Heading</b>: | Health policy                                                                                                                                                                                                                                                                      |
| Secondary Subject Heading:      | Health policy, Health services research, Mental health                                                                                                                                                                                                                             |
| Keywords:                       | Posttraumatic stress disorder symptoms (PTSD), physical violence, social support, coping styles, MENTAL HEALTH, personality                                                                                                                                                        |
|                                 |                                                                                                                                                                                                                                                                                    |

SCHOLARONE™  
Manuscripts

1  
2  
3  
4 **Prevalence and correlates of symptoms of post-traumatic stress disorder among**  
5  
6 **Chinese healthcare workers exposed to physical violence: a cross-sectional study**  
7  
8

9  
10  
11 Lei Shi,<sup>1</sup> Lingling Wang,<sup>2</sup> Xiaoli Jia,<sup>2</sup> Zhe Li,<sup>1</sup> Huitong Mu,<sup>1</sup> Xin Liu,<sup>1</sup> Boshi Peng,<sup>3</sup> Anqi Li,<sup>1</sup> Lihua Fan<sup>1</sup>  
12  
13

14  
15  
16 **Correspondence to:** Lihua Fan, School of Public Health, Harbin Medical University, 157 Baojian  
17  
18 Road, Nangang District, Harbin 150081, China; E-mail: [lihuafan@126.com](mailto:lihuafan@126.com)  
19  
20

21  
22  
23 <sup>1</sup>Department of Health Management, School of Public Health, Harbin Medical University, Harbin,  
24  
25 Heilongjiang, China  
26

27  
28  
29 <sup>2</sup>Department of Autonomous Protection, Chinese Hospital Association, Beijing, China  
30  
31

32  
33 <sup>3</sup>Department of Scientific Research, The Second Affiliated Hospital of Harbin Medical University,  
34  
35 Harbin, Heilongjiang, China  
36  
37  
38  
39  
40  
41  
42  
43  
44  
45  
46  
47  
48  
49  
50  
51  
52  
53  
54  
55  
56  
57  
58  
59  
60



## Abstract

### Objectives

Post-traumatic stress disorder (PTSD) is a common psychological maladjustment to undergoing a traumatic event. Our aim was to measure the prevalence of PTSD among Chinese healthcare workers exposed to physical violence, and explore the associations of their demographic characteristics, social support, personality traits, and coping styles with their PTSD symptoms.

### Methods

A cross-sectional study was conducted using the: Workplace Violence Scale, Posttraumatic Stress Disorder Checklist-Civilian Version (PCL-C), Social Support Rating Scale (SSRS), Revised Eysenck Personality Questionnaire-Short Scale and Trait Coping Style Questionnaire. We used convenience sampling method to collect data from March 2015 to September 2016. Healthcare workers (N = 2,706) from 39 public hospitals located in Heilongjiang, Hebei, and Beijing Provinces of China completed the questionnaires (effective response rate = 84.25%).

### Results

Overall, the prevalence of physical violence in the previous 12 months was 13.60% (N = 2,706). The prevalence of PTSD among the healthcare workers who experienced physical violence was 28.0% (n = 368). Most of the victims of physical violence (50.80%) did not exhibit PTSD symptoms based on their PCL-C scores, and 47.0% did not manifest the diagnostic criteria for PTSD after experiencing physical violence. The level of PTSD symptoms was negatively correlated with their scores on the SSRS ( $r = -0.188$ ,  $P < 0.001$ ). The hierarchical regression analysis (Block 3) revealed that in women, positive coping was significantly associated with PTSD symptoms ( $\beta = -0.376$ ,  $P = 0.001$ ). However, the effect of positive coping was not significant in men.

## Conclusions

The prevalence of PTSD among the victims was similar to that found in Atlanta. The positive effects of social support on PTSD symptoms suggest that it has practical implications for interventions to promote psychological health. The healthcare workers' coping styles influenced the development of PTSD symptoms. Therefore, adopting effective coping styles and receiving social support have potential roles in the recovery from trauma after experiencing physical violence.

## Strengths and limitations of this study

- In China, few studies have been conducted on PTSD symptoms following healthcare workers' exposure to physical violence.
- We assessed the prevalence of PTSD and explored the correlates of PTSD symptoms among Chinese healthcare workers exposed to physical violence.
- Our study was conducted at 39 public hospitals in three provinces using convenience sampling. Therefore, the representativeness of the sample is limited.
- The retrospective approach to collecting data using self-reports of PTSD symptoms might have led to recall and report bias.

## BACKGROUND

Post-traumatic stress disorder (PTSD) is a psychological state of imbalance, characterized by a series of chronic emotional reactions to a traumatic event, including re-experiencing, avoidance, and heightened arousal, as outlined in the Diagnostic and Statistical Manual of Psychiatric Disorders-4<sup>th</sup> edition (DSM-IV).<sup>1-3</sup> However, the criteria for PTSD in the manual's fifth edition (DSM-5) include not three but four symptom clusters: including re-experiencing, avoidance, negative alterations in mood and cognition, and hyperarousal.<sup>4</sup> It is worth noting that PTSD has shifted from its classification as an anxiety disorder in the DSM-IV to a new category of Trauma and Stress-related Disorders in the DSM-5.<sup>4</sup> Although a substantial number of studies indicate that almost all people exhibit intrusive and repetitive symptoms after exposure to excessive stress,<sup>5</sup> only a small percentage develop avoidance and hyper-arousal symptoms. Most individuals showing PTSD symptoms after exposure to a traumatic event recover within weeks or months. However, 10%–25% might develop chronic PTSD that lasts for several months or years, or even a lifetime.<sup>6</sup>

PTSD originated from reports of the war-related trauma, and was applied gradually to a variety of man-made and natural disasters.<sup>7</sup> Scholars have reported that the incidence of PTSD among male and female Vietnam veterans in the USA is 15.2% and 8.5%, respectively.<sup>8</sup> Moreover, most of the Chinese studies on PTSD have focused on wars, traffic accidents, and natural disasters.<sup>9-10</sup> Differences in the incidence rates of PTSD for different types of trauma have been reported in China. For instance, the prevalence of PTSD has been reported to be 8.65% among soldiers assigned to military vehicles at high altitudes, 33.89% among flood-disaster survivors, 18.8% among earthquake survivors, 41% among traffic-accident survivors, and 78.6% among survivors of a serious explosion.<sup>11</sup>

PTSD symptoms and the full range of criteria comprising a PTSD diagnosis have been observed

1  
2  
3  
4 in rescue and ambulance personnel.<sup>12-13</sup> Healthcare workers typically are exposed to two types of  
5  
6 trauma in the hospital setting: direct (personal involvement in traumatic events through confrontations  
7  
8 resulting in their own traumatic experiences e.g., workplace violence) and indirect (non-personal  
9  
10 involvement in traumatic events through others' confrontations resulting in other people's traumatic  
11  
12 experiences e.g., witnessing other people's direct experiences of workplace violence, caring for dying  
13  
14 patients, and threats of severe injury or exposure to trauma).<sup>4 14-16</sup> In the present study, a traumatic event  
15  
16 refers to a healthcare worker's exposure to physical violence in the workplace. Workplace violence is  
17  
18 divided into physical and psychological violence.<sup>17</sup> Physical violence causes more serious physical and  
19  
20 psychological damage (e.g., PTSD, anxiety, fear, and depression) than other forms of violence.<sup>18-20</sup>  
21  
22 Physical violence refers to the use of physical force against an individual or a group, and can lead to  
23  
24 physical, psychological, or sexual harm; it includes hitting, shooting, kicking, slapping, pushing, biting,  
25  
26 pinching, wounding using sharp objects, and sexual assault and rape.<sup>17</sup> Approximately 50% of  
27  
28 healthcare workers have experienced at least one violent incident during their working lives.<sup>21</sup> During  
29  
30 the past 12 months, the incidence rate of physical violence for nurses in different countries has ranged  
31  
32 from 9.1% to 56.0%.<sup>22-25</sup> The results of a systematic review of studies conducted in Iran indicated that  
33  
34 the most common types of physical violence experienced by 43% of participants were pushing or  
35  
36 pinching.<sup>26</sup> In China, physician-patient conflicts present a growing trend, with an increase in the  
37  
38 number of healthcare workers killed by patients or their relatives to 24, and an increase in injures from  
39  
40 2003 to 2013.<sup>27</sup> Several studies have estimated the prevalence of PTSD among emergency department  
41  
42 staff to range from 10% to 25%.<sup>28-30</sup> Noelle Robertson and Andrew Perry conducted a systematic  
43  
44 review of PTSD research investigations; the results showed that the prevalence of PTSD ranged from 8%  
45  
46 to 29% among different hospital-based departments.<sup>31</sup> There are also reports of the occurrence of PTSD  
47  
48  
49  
50  
51  
52  
53  
54  
55  
56  
57  
58  
59  
60

1  
2  
3 among Chinese nurses working in emergency departments, intensive care units, and operating rooms.  
4  
5  
6 However, the number of research studies on PTSD among healthcare workers has been relatively few  
7  
8  
9 in China.

10  
11 Demographic variables (e.g., age, gender, and educational level) and psychological and social  
12  
13 variables (e.g., personality, coping style, and social support) have been found to be significantly  
14  
15 associated with cancer-related PTSD symptoms.<sup>32-33</sup> Previous studies have found that the risk of PTSD  
16  
17 was most strongly associated with neuroticism and problem-focused coping strategies in the general  
18  
19 population.<sup>34-35</sup> Neuroticism was the most critical personality dimension in predicting PTSD, and  
20  
21 avoidant coping and social support mediated the relationship between neuroticism and PTSD in a high  
22  
23 proportion of adult burn survivors.<sup>36</sup> Social support has been reported to play a significant role in  
24  
25 helping nurses cope with work-related stress.<sup>37</sup> A meta-analysis indicated that work-related critical  
26  
27 incidents were positively related to PTSD symptoms.<sup>38</sup>

28  
29 In this study, we aimed to assess the prevalence of PTSD, and to explore the associations of  
30  
31 demographic characteristics, social support, personality characteristics, and coping styles with PTSD  
32  
33 symptoms among Chinese healthcare workers exposed to physical violence.  
34  
35  
36  
37  
38  
39  
40  
41  
42  
43

## 44 **METHODS**

### 45 **Participants and Procedures**

46  
47 A cross-sectional study was conducted from March 2015 through September 2016 with a sample of  
48  
49 healthcare workers employed by 39 public hospitals located in Heilongjiang, Hebei, and Beijing  
50  
51 Provinces of China. The 39 public hospitals that served as the research settings were chosen using  
52  
53 convenience sampling method (convenience sampling method is a non-probability method, and the  
54  
55  
56  
57  
58  
59  
60

1  
2  
3  
4 findings should not be generalized). All investigators were trained using a uniform survey manual  
5  
6 before they began to collect data. Qualified investigators were appointed to collect data. We obtained  
7  
8 permission from the managers and the medical dispute resolution and human resources departments of  
9  
10 the hospitals. The investigators conducted surveys by using an anonymous, self-administered  
11  
12 questionnaire. We purposely selected 3 public hospitals in Harbin (the First Affiliated Hospital of  
13  
14 Harbin Medical University, the Second Affiliated Hospital of Harbin Medical University, and the  
15  
16 Fourth Affiliated Hospital of Harbin Medical University) as the sites for our pilot study site before the  
17  
18 formal investigation. A total of 150 questionnaires were distributed and returned (these data were  
19  
20 excluded from the main study). A total of 3,212 healthcare workers (i.e., physicians, nurses and medical  
21  
22 technicians) were investigated using convenience sampling in the formal investigation. The researchers  
23  
24 and hospital coordinators distributed and collected the questionnaires that were completed by the  
25  
26 healthcare workers immediately. A total of 2,706 valid questionnaires were returned, and the effective  
27  
28 response rate was 84.25%. This study's focus was only on PTSD symptoms among healthcare workers  
29  
30 exposed to physical violence; thus, only 368 responses were considered valid data and were analyzed  
31  
32 in the present study.  
33  
34  
35  
36  
37  
38  
39  
40

41 The inclusion criteria for participation in this study were as follows: (1) at least one year of work  
42  
43 experience; (2) voluntary participation; (3) participation would not affect the participation's work; and  
44  
45 (4) experience of physical violence in the previous 12 months. Individuals were excluded if they (1)  
46  
47 had received any psychological treatment after experiencing physical violence; (2) experienced other  
48  
49 traumatic events, including workplace psychological violence or serious life events (e.g., domestic  
50  
51 violence or attacks by criminals), serious accidents (e.g., fires, explosions, or traffic accidents), natural  
52  
53 disasters (e.g., typhoons, earthquakes, or floods), or (3) were indirectly exposed to trauma,<sup>39-40</sup> (e.g.,  
54  
55  
56  
57  
58  
59  
60

witnessing other people experience traumatic events).

## QUESTIONNAIRE

### Demographic characteristics

Demographic data on the healthcare workers were collected, including gender, age, marital status, educational status, professional title, department, occupation, and work experience. Age was categorized as  $\leq 30$ , 31–50, and  $\geq 51$  years old. Marital status was categorized as married and single/divorced/widowed. Educational status was classified as junior college or below, undergraduate, and graduate. Occupation was divided into three groups: physician, nurse, and medical technician. Professional title was categorized as primary, intermediate, and senior. Department was classified as emergency department, internal medicine, surgery, obstetrics and gynecology, pediatrics, and other. Work experience was divided into four categories:  $\leq 4$ , 5–10, 11–20, and  $\geq 21$  years.

### Workplace Violence Scale

The Workplace Violence (WPV) Scale developed by the International Labour Office, International Council of Nurses, World Health Organization, and Public Services International Joint Programme on Workplace Violence in the Health Sector in 2003 and the revised Survey of Violence Experienced by Staff (SOVES-G-R) was used to measure workplace violence.<sup>41-42</sup> We obtained permission to use these scales. The scale used in this study consists of 2 dimensions (physical violence and psychological violence) and has 9 items that were adopted from these scales. Each item is scored on a 4-point scale reflecting respondents' frequency of exposure to violence in the past 12 months (0 = 0 times, 1 = 1 time, 2 = 2–3 times, and 3 =  $\geq 4$  times). The total possible score ranges from 0 to 27, with a higher total score indicating a higher frequency of exposure to WPV. The physical violence subscale consists of 6 items, thus, the total possible score ranges from 1 to 18. In the present study, Cronbach's  $\alpha$  for the WPV Scale

1  
2  
3  
4 was 0.86.  
5

## 6 **PTSD**

7  
8 The PTSD Checklist-Civilian Version (PCL-C), which has been used to measure PTSD symptoms  
9 among healthcare workers was used in the present study.<sup>43-44</sup> It consists of 17 self-report items, which  
10 comprise three dimensions, namely, re-experiencing (items 1–5), avoidance/numbing (items 6–12) and  
11 hyper-arousal (items 13–17). The three dimensions correspond to the DSM-IV symptoms criteria for  
12 PTSD.<sup>2</sup> The response options for each item on the PCL-C are rated from 1 (not at all) to 5 (extremely),  
13 based on the extent to which the respondent has been troubled by specific symptoms in the past month.  
14  
15 The total possible score is calculated by adding the scores for all items, and it ranges from 17 to 85  
16 points, with a higher score indicating a higher risk for PTSD symptoms. A total score  $\geq 50$  is indicative  
17 of the full PTSD diagnosis (sensitivity = 0.82; specificity = 0.83; kappa = 0.64).<sup>45</sup> In this study, the  
18 traumatic event in the original PCL-C was replaced by physical violence. The reliability and validity of  
19 this instrument have been shown to be high in a wide range of Chinese samples.<sup>46</sup> The present study  
20 revealed that Cronbach's  $\alpha$  for the PCL-C was 0.934, and for the three subscales it was 0.872  
21 (re-experiencing), 0.921 (avoidance), and 0.926 (hyper-arousal).  
22  
23  
24  
25  
26  
27  
28  
29  
30  
31  
32  
33  
34  
35  
36  
37  
38  
39  
40

## 41 **Revised Eysenck Personality Questionnaire-Short Scale**

42  
43 Personality traits were measured using the **Revised Eysenck Personality Questionnaire-Short Scale** for  
44 Chinese (EPQ-RSC).<sup>47-48</sup> The EPQ-RSC consists of 48 items, categorized into 4 subscales reflecting  
45 personality traits: Extraversion, Neuroticism, Psychoticism, and Lie. Each item is scored on a  
46 dichotomous scale (1=Yes, 0=No) to measure personality characteristics. The scores of the positively  
47 and negatively worded items are summed in accordance with each personality trait. Early studies found  
48 the EPQ-RSC to have high reliability and validity as a measure of personality traits in China.<sup>48-49</sup> The  
49  
50  
51  
52  
53  
54  
55  
56  
57  
58  
59  
60



1  
2  
3  
4 total score for the Extraversion subscale indicates introversion when it is less than 43.3, intermediate  
5  
6 when it is from 43.3 to 56.7 and extraversion when it is greater than 56.7.<sup>49</sup> For the Psychoticism  
7  
8 subscale, tough-minded is defined as a total score greater than 56.7; intermediate is defined as a total  
9  
10 score is between 43.3 and 56.7, and mild is defined as a total score less than 43.3.<sup>49</sup> For the  
11  
12 Neuroticism subscale, a total score of less than 43.3 defines emotional stability, whereas a total score  
13  
14 from 43.3 to 56.7 defines intermediate, and a total score greater than 56.7 defines emotional  
15  
16 instability.<sup>49</sup> For the Lie subscale, a total score of 60 or greater indicates that information provided by  
17  
18 the respondent might be unreliable.<sup>49</sup> In this study, Cronbach's  $\alpha$  for the EPQ-RSC was 0.903. The  
19  
20 internal consistency coefficients were 0.854, 0.756, 0.791, and 0.762, for the Extraversion, Neuroticism,  
21  
22 Psychoticism, and Lie subscales, respectively.  
23  
24  
25  
26  
27

### 28 29 **Trait Coping Style Questionnaire**

30  
31 The Trait Coping Style Questionnaire (TCSQ) was used in this study to assess participants' style of  
32  
33 coping with life events.<sup>37 50</sup> The TCSQ consists of 20 items, including 10 items measuring positive  
34  
35 coping (items 1, 3, 5, 8, 9, 11, 14, 15, 18, 20) and 10 items measuring negative coping (items 2, 4, 6, 7,  
36  
37 10, 12, 13, 16, 17, 19). Positive coping refers to individuals who, when faced with a problem, tend to  
38  
39 deal with it in a positive way, and are able to quickly forget unpleasant aspects. Negative coping refers  
40  
41 to the tendency to use negative coping methods to deal with problems and vent frustrations to other  
42  
43 people, which makes it is easier to ignore unpleasant thoughts. For example, when conflicts with others,  
44  
45 arise, individuals who use negative coping will ignore the opposing side for a long time.<sup>51</sup> Each item is  
46  
47 rated on a 5-point Likert scale. The total possible score for positive and negative coping is calculated  
48  
49 by adding the scores for all the items. Previous studies have found the TCSQ to have high reliability  
50  
51 and validity as a measure of coping style in China.<sup>50-51</sup> In this study, Cronbach's  $\alpha$  for the total scale was  
52  
53  
54  
55  
56  
57  
58  
59  
60

1  
2  
3  
4 0.845, and the internal consistency coefficients of the subscales were  $\alpha=0.823$  (positive coping), and  
5  
6  $\alpha=0.863$  (negative coping).  
7

### 8 9 **Social Support Rating Scale**

10  
11 Social support was evaluated using the Chinese version of the Social Support Rating Scale (SSRS),<sup>52-54</sup>  
12  
13 which is a brief measure of the overall situation of respondents' social support. This 10-item scale is  
14  
15 divided into 3 dimensions: subjective support (items 1, 3, 4, 5), objective support (items 2, 6, 7) and  
16  
17 utilization of support (items 8, 9, 10). Subjective support refers to an individual's emotional experience  
18  
19 of being respected, supported, and understood by their social group, and it is closely related to the  
20  
21 individual's subjective feelings. Objective support refers to visible support, including material and  
22  
23 direct assistance, social networks, group relationships, and the individual's degree of participation in  
24  
25 societal activities with family, friends, and colleagues (e.g., marriage). A low level of social support  
26  
27 is defined as a total score between 12 and 44, an intermediate level as a total score is between 45 and  
28  
29 54, and high level as a total score greater than 55.<sup>54</sup> The present study revealed that Cronbach's  $\alpha$  for  
30  
31 the SSRS was 0.865, and for the three subscales it was 0.884 (subjective support), 0.911(objective  
32  
33 support), and 0.875 (the availability of support).  
34  
35  
36  
37  
38  
39  
40  
41  
42  
43

### 44 **DATA ANALYSIS**

45  
46 EpiData version 3.1 was used to establish the study's database. We eliminated the questions with  
47  
48 missing data or quality issues. To ensure accuracy, two trained personnel entered the data after all the  
49  
50 surveys were completed. IBM SPSS Version 19.0 and Excel were used for the data analysis. The  
51  
52 normal distributions of the continuous variables were verified using P-P plots and K-S tests.  
53  
54 Descriptive statistics, including numbers (n), percentages (%), means, and standard deviations (SD)  
55  
56  
57  
58  
59  
60

1  
2  
3  
4 were calculated for the demographic variables. We used one-way analysis of variance (ANOVA) or  
5  
6 independent sample t-tests to compare group differences on the measures of the continuous variables.  
7  
8 The chi-square ( $\chi^2$ ) test was used to compare differences in the categorical variables. Pearson's  
9  
10 correlations were used to examine correlations among the continuous variables. Hierarchical regression  
11  
12 analysis was used to examine the associations of the demographic characteristics and the scores on the  
13  
14 SSRS, EPQ-RSC, and TCSQ with PTSD symptoms. Statistics, including F values,  $R^2$ ,  $R^2$ -changes  
15  
16 ( $\Delta R^2$ ), standardized regression coefficients ( $\beta$ ), and P-values for each step in the regression model were  
17  
18 reported. All the study variables were tested for multicollinearity. A P-value < 0.05 was considered to  
19  
20 be statistically significance.  
21  
22  
23  
24  
25  
26  
27  
28

### 29 **STROBE STATAMENT**

30  
31 We declared that the STROBE (Strengthening the Reporting of Observational Studies in Epidemiology)  
32  
33 guidelines are followed in this study.  
34  
35  
36  
37  
38

### 39 **ETHICAL CONSIDERATIONS**

40  
41 Ethical approval to conduct this study was granted by the Research Ethics Committee of Harbin  
42  
43 Medical University, and informed consent was obtained from each hospital and healthcare worker  
44  
45 involved in the investigation. All of the participants gave their informed consent before the survey;  
46  
47 they were assured that their personal information would be kept confidential.  
48  
49  
50  
51  
52

### 53 **RESULTS**

#### 54 **Demographic Characteristics of the Respondents**

55  
56  
57  
58  
59  
60

The demographic characteristics of the respondents are shown in Table 1.

**Table 1. Demographic characteristics of the respondents (N=2706).**

| Demographic variables |                           | n    | %    |
|-----------------------|---------------------------|------|------|
| Gender                | Male                      | 623  | 23.0 |
|                       | Female                    | 2083 | 77.0 |
| Age group             | ≤ 30                      | 1258 | 46.5 |
|                       | 31-50                     | 1341 | 49.5 |
|                       | ≥ 51                      | 107  | 4.0  |
| Educational level     | Junior college or below   | 856  | 31.6 |
|                       | Undergraduate             | 1341 | 49.6 |
|                       | Graduate                  | 509  | 18.8 |
| Marital status        | Married                   | 1859 | 68.7 |
|                       | Single/divorced/widowed   | 847  | 31.3 |
| Occupation            | Physician                 | 1058 | 39.1 |
|                       | Nurse                     | 1520 | 56.2 |
|                       | Medical Technician        | 128  | 4.7  |
| Technical title       | Primary                   | 1147 | 42.4 |
|                       | Intermediate              | 1026 | 37.9 |
|                       | Senior                    | 533  | 19.7 |
| Department            | Emergency Department      | 323  | 11.9 |
|                       | Internal Medicine         | 813  | 30.0 |
|                       | Surgery                   | 752  | 27.8 |
|                       | Obstetrics and Gynecology | 276  | 10.2 |
|                       | Pediatrics                | 218  | 8.1  |
| Years of experience   | Other                     | 324  | 12.0 |
|                       | ≤ 4                       | 1014 | 37.5 |
|                       | 5-10                      | 820  | 30.3 |
|                       | 11-20                     | 503  | 18.6 |
|                       | ≥ 21                      | 369  | 13.6 |

#### Characteristics of the Victims in Relation to PTSD Symptoms

Of the 368 victims of physical violence, 59.8% were women, 51.3% completed an undergraduate education, and 73.9% were married. The characteristics of the victims in relation to PTSD symptoms are presented in Table 2.

**Table 2. Characteristics of victims in relation to PTSD symptoms. (N=368).**

| Variables | n      | %   | PTSD     |       | F/t   | P     |       |
|-----------|--------|-----|----------|-------|-------|-------|-------|
|           |        |     | symptoms |       |       |       |       |
|           |        |     | Mean     | SD    |       |       |       |
| Gender    | Male   | 148 | 40.2     | 44.03 | 16.19 | 3.537 | 0.000 |
|           | Female | 220 | 59.8     | 38.30 | 13.71 |       |       |

|                        |                           |     |      |       |       |       |       |
|------------------------|---------------------------|-----|------|-------|-------|-------|-------|
| Age group              | ≤ 30                      | 133 | 36.1 | 38.09 | 13.36 | 2.946 | 0.054 |
|                        | 31-50                     | 216 | 58.7 | 42.01 | 15.56 |       |       |
|                        | ≥ 51                      | 19  | 5.2  | 42.10 | 17.80 |       |       |
| Educational level      | Junior college or below   | 118 | 32.1 | 38.14 | 13.54 | 2.592 | 0.076 |
|                        | Undergraduate             | 189 | 51.3 | 42.13 | 15.46 |       |       |
|                        | Graduate                  | 61  | 16.6 | 40.64 | 15.85 |       |       |
| Marital status         | Married                   | 272 | 73.9 | 41.51 | 15.75 | 2.195 | 0.029 |
|                        | Single/divorced/widowed   | 96  | 26.1 | 38.03 | 12.38 |       |       |
| Occupation             | Physician                 | 175 | 47.6 | 42.97 | 15.37 | 4.379 | 0.013 |
|                        | Nurse                     | 180 | 48.9 | 38.29 | 13.82 |       |       |
|                        | Medical Technician        | 13  | 3.5  | 40.69 | 21.24 |       |       |
| Technical title        | Primary                   | 145 | 39.4 | 39.56 | 13.04 | 0.576 | 0.562 |
|                        | Intermediate              | 126 | 34.2 | 41.32 | 16.21 |       |       |
|                        | Senior                    | 97  | 26.4 | 41.23 | 16.16 |       |       |
| Department             | Emergency Department      | 68  | 18.5 | 41.46 | 16.08 | 0.722 | 0.607 |
|                        | Internal Medicine         | 76  | 20.7 | 38.45 | 15.07 |       |       |
|                        | Surgery                   | 123 | 33.4 | 41.53 | 13.91 |       |       |
|                        | Obstetrics and Gynecology | 19  | 5.2  | 41.63 | 16.52 |       |       |
|                        | Pediatrics                | 27  | 7.3  | 37.63 | 10.37 |       |       |
|                        | Other                     | 55  | 14.9 | 41.55 | 17.28 |       |       |
| Years of experience    | ≤ 4                       | 101 | 27.4 | 37.19 | 13.25 | 2.158 | 0.063 |
|                        | 5-10                      | 120 | 32.6 | 42.13 | 14.52 |       |       |
|                        | 11-20                     | 87  | 23.7 | 41.90 | 16.80 |       |       |
|                        | ≥ 21                      | 60  | 16.3 | 41.42 | 15.46 |       |       |
| Social support         | Low                       | 224 | 60.9 | 42.41 | 15.06 | 5.904 | 0.003 |
|                        | Medium                    | 130 | 35.3 | 38.52 | 14.40 |       |       |
|                        | High                      | 14  | 3.8  | 31.00 | 14.53 |       |       |
| Subjective support     | Low                       | 22  | 6.0  | 41.91 | 18.63 | 0.859 | 0.425 |
|                        | Medium                    | 38  | 10.3 | 43.37 | 12.93 |       |       |
|                        | High                      | 308 | 83.7 | 40.17 | 14.97 |       |       |
| Objective support      | Low                       | 206 | 56.0 | 42.19 | 15.47 | 3.369 | 0.035 |
|                        | Medium                    | 155 | 42.1 | 38.87 | 14.32 |       |       |
|                        | High                      | 7   | 1.9  | 32.00 | 9.24  |       |       |
| Utilization of support | Low                       | 39  | 10.6 | 48.18 | 16.98 | 6.979 | 0.001 |
|                        | Medium                    | 259 | 70.4 | 40.37 | 14.56 |       |       |
|                        | High                      | 70  | 19.0 | 37.24 | 14.23 |       |       |
| Extraversion           | Introversion              | 102 | 27.7 | 39.45 | 13.35 | 1.278 | 0.280 |
|                        | Middle                    | 164 | 44.6 | 41.99 | 16.04 |       |       |
|                        | Extraversion              | 102 | 27.7 | 39.51 | 14.80 |       |       |
| Psychoticism           | Mild                      | 68  | 18.5 | 42.22 | 16.87 | 0.998 | 0.370 |
|                        | Middle                    | 213 | 57.9 | 40.79 | 15.24 |       |       |
|                        | Tough-minded              | 87  | 23.6 | 38.86 | 12.69 |       |       |
| Neuroticism            | Emotional instability     | 100 | 27.2 | 40.33 | 13.80 | 0.530 | 0.589 |
|                        | Middle                    | 153 | 41.6 | 41.50 | 16.72 |       |       |

Emotional stability 115 31.2 39.63 13.60

Note. PTSD = post-traumatic stress disorder; SD = standard deviations.

### Prevalence of Physical Violence in the Previous 12 Months

During the past 12 months, the prevalence of physical violence and psychological violence toward healthcare workers were 13.60% (368/2706) and 59.64% (1614/2706), respectively. The respondents reported that the patients' relatives were the main perpetrators (67.4%, n = 248), followed by the patients (23.6%, n = 87).

### Prevalence of PTSD

The PTSD symptoms based on the victims' PCL-C scores are summarized in Table 3. According to their scores on the PCL-C, 103 victims (28.0%) met the full criteria for a PTSD diagnosis and 21.2% of victims were at risk for developing PTSD.

According to the DSM IV-TR criteria for PTSD,<sup>2</sup> 47.0% of the victims did not appear to manifest the diagnostic criteria. Re-experiencing was the most frequently observed criterion for PTSD observed among the victims (45.1%), followed by hyper-arousal (37.8%).

**Table 3. Sample description and prevalence of PTSD.**

| PTSD symptoms                                    | Physical violence |      |
|--------------------------------------------------|-------------------|------|
|                                                  | n                 | %    |
| <b>PTSD symptoms based on PCL-C scores</b>       |                   |      |
| No obvious PTSD symptoms (17-37)                 | 187               | 50.8 |
| Criteria met for potential risk of PTSD (38-49)  | 78                | 21.2 |
| Criteria met for the full PTSD diagnosis (50-85) | 103               | 28.0 |
| <b>PTSD symptoms based on PTSD criterion*</b>    |                   |      |
| No criterion manifestation                       | 173               | 47.0 |
| Re-experiencing (Criterion B)                    | 166               | 45.1 |
| Avoidance (Criterion C)                          | 129               | 35.1 |
| Hyper-arousal (Criterion D)                      | 139               | 37.8 |

Note. PTSD = post-traumatic stress disorder; PCL-C = PTSD Checklist-Civilian Version.

\*Participants may have more than one criteria.

### Correlations of the EPQ-RSC, TCSQ and SSRS Scores with PTSD Symptoms

Table 4 shows the correlations among the victims' PTSD symptoms and scores on the EPQ-RSC,

**Table 4. Pearson correlations among PTSD symptoms, EPQ-RSC, TCSQ, SSRS and Physical Violence.**

| Variables                  | Mean  | SD    | 1       | 2       | 3       | 4       | 5       | 6       | 7       | 8       | 9       | 10    | 11   | 12    | 13     | 14 |
|----------------------------|-------|-------|---------|---------|---------|---------|---------|---------|---------|---------|---------|-------|------|-------|--------|----|
| 1.PTSD symptoms            | 40.60 | 15.01 | -       |         |         |         |         |         |         |         |         |       |      |       |        |    |
| 2.Re-experiencing          | 12.43 | 4.92  | 0.89**  | -       |         |         |         |         |         |         |         |       |      |       |        |    |
| 3.Avoidance                | 15.70 | 5.99  | 0.94**  | 0.77**  | -       |         |         |         |         |         |         |       |      |       |        |    |
| 4.Hyper-arousal            | 12.46 | 5.48  | 0.91**  | 0.70**  | 0.79**  | -       |         |         |         |         |         |       |      |       |        |    |
| 5.Physical violence        | 3.08  | 2.99  | 0.26**  | 0.22**  | 0.31**  | 0.18**  | -       |         |         |         |         |       |      |       |        |    |
| 6.SSRS                     | 41.73 | 8.44  | -0.19** | -0.12** | -0.22** | -0.17** | -0.12** | -       |         |         |         |       |      |       |        |    |
| 7.Subjective support       | 25.23 | 5.14  | -0.09   | -0.02   | -0.13*  | -0.09   | 0.01    | 0.89**  | -       |         |         |       |      |       |        |    |
| 8.Objective support        | 8.63  | 3.30  | -0.21** | -0.17** | -0.23** | -0.17** | -0.20** | 0.77**  | 0.46**  | -       |         |       |      |       |        |    |
| 9.Utilization of support   | 7.87  | 2.01  | -0.21** | -0.15** | -0.22** | -0.20** | -0.21** | 0.66**  | 0.43**  | 0.40**  | -       |       |      |       |        |    |
| 10.Positive coping of TCSQ | 30.05 | 7.22  | -0.16** | -0.15** | -0.12*  | -0.18** | -0.13*  | 0.10    | 0.04    | 0.10*   | 0.15**  | -     |      |       |        |    |
| 11.Negative coping of TCSQ | 26.92 | 7.33  | 0.19**  | 0.10    | 0.19**  | 0.22**  | 0.04    | -0.31** | -0.26** | -0.29** | -0.17** | 0.12* | -    |       |        |    |
| 12.Extraversion            | 49.81 | 10.33 | -0.01   | -0.03   | 0.01    | -0.01   | 0.06    | -0.05   | -0.02   | -0.08   | -0.02   | -0.04 | 0.02 | -     |        |    |
| 13.Psychoticism            | 50.10 | 9.81  | 0.06    | 0.06    | 0.06    | 0.04    | 0.00    | 0.02    | 0.02    | 0.06    | 0.02    | 0.02  | 0.04 | -0.02 | -      |    |
| 14.Neuroticism             | 50.07 | 10.34 | 0.03    | 0.04    | 0.01    | 0.05    | 0.03    | 0.03    | 0.01    | 0.05    | 0.04    | 0.01  | 0.04 | -0.09 | 0.20** | -  |

Note. SD = standard deviations; PTSD = post-traumatic stress disorder; EPQ-RSC = Eysenck Personality Questionnaire-Revised Short Scale for Chinese; SSRS = Social Support Rating Scale; TCSQ = Trait Coping Style Questionnaire.

\* $P < 0.05$ , \*\* $P < 0.01$



TCSQ, SRSS, and the physical violence subscale. The mean score for PTSD symptoms on the PCL-C was 40.60 (SD = 15.01). As expected, the level of PTSD symptoms was negatively correlated with respondents' scores on the SSRS ( $r = -0.188, P < 0.001$ ) and positive coping subscale of the TCSQ ( $r = -0.164, P = 0.002$ ), respectively. Physical violence was positively associated with PTSD symptoms ( $r = 0.259, P < 0.001$ ). The level of PTSD symptoms was positively correlated with victims' scores on the negative coping subscale of the TCSQ ( $r = 0.188, P < 0.001$ ).

### Hierarchical Regression Analysis of Factors Related to PTSD Symptoms

The results of the hierarchical regression analysis are presented in Table 5. Variables that had a statistically significant association with PTSD were used as control variables. Gender had a significant effect on PTSD symptoms in the model (Block 1). As shown in Block 2, physical violence was positively associated with PTSD symptoms ( $\beta = 1.216, P < 0.001$ ). As shown in Block 3, positive coping as measured by the TCSQ was negatively associated with PTSD symptoms ( $\beta = -0.327, P = 0.002$ ), whereas, negative coping was positively associated with PTSD symptoms in the regression model ( $\beta = 0.353, P = 0.001$ ). Furthermore, gender had a significant effect on PTSD symptoms, and men were more vulnerable to PTSD symptoms than women (Table 1). Therefore, we explored the potential correlates of PTSD symptoms in men and women (Table 6). As shown in Block 3, among the women, positive coping as measured by the TCSQ was significantly associated with PTSD symptoms ( $\beta = -0.376, P = 0.001$ ), but the effect of positive coping was not significant in men.

**Table 5. Hierarchical regression for exploring the correlates of PTSD symptoms.**

| Variables               | Block 1 ( $\beta$ ) | Block 2 ( $\beta$ ) | Block 3 ( $\beta$ ) | Block 4 ( $\beta$ ) |
|-------------------------|---------------------|---------------------|---------------------|---------------------|
| Gender                  | -4.663*             | -3.282              | -3.060              | -3.012              |
| Marital status          | -2.021              | -1.859              | -2.626              | -2.798              |
| Occupation              | -1.274              | -1.918              | -2.494              | -2.414              |
| Physical violence       |                     | 1.216**             | 1.015**             | 1.028**             |
| SSRS                    |                     |                     | -0.193*             | -0.192*             |
| Positive coping of TCSQ |                     |                     | -0.327**            | -0.325**            |

|                         |         |         |          |          |
|-------------------------|---------|---------|----------|----------|
| Negative coping of TCSQ |         |         | 0.353**  | 0.361**  |
| Extraversion            |         |         |          | -0.049   |
| Psychoticism            |         |         |          | 0.081    |
| Neuroticism             |         |         |          | 0.042    |
| <i>F</i>                | 5.189** | 9.886** | 10.544** | 11.584** |
| <i>R</i> <sup>2</sup>   | 0.041   | 0.098   | 0.170    | 0.246    |
| $\Delta R^2$            | 0.041   | 0.057** | 0.072**  | 0.076*   |

Note. PTSD = post-traumatic stress disorder; SSRS = Social Support Rating Scale; TCSQ = Trait Coping Style Questionnaire.

\* $P < 0.05$ , \*\* $P < 0.01$

**Table 6. Hierarchical regression for exploring the correlates of PTSD symptoms in men and women, respectively.**

|               | Variables               | Mean (SD)     | Block 1 ( $\beta$ ) | Block 2 ( $\beta$ ) | Block 3 ( $\beta$ ) |
|---------------|-------------------------|---------------|---------------------|---------------------|---------------------|
| <b>Male</b>   |                         |               |                     |                     |                     |
| n = 148       | Physical violence       | 3.60 (3.16)   | 1.216**             | 1.033*              | 1.073**             |
|               | SSRS                    | 41.25 (9.32)  |                     | -0.255              | -0.257              |
|               | Positive coping of TCSQ | 30.75 (7.28)  |                     | -0.298              | -0.318              |
|               | Negative coping of TCSQ | 27.21 (6.61)  |                     | 0.467*              | 0.479*              |
|               | Extraversion            | 49.18 (10.04) |                     |                     | 0.062               |
|               | Psychoticism            | 50.02 (8.62)  |                     |                     | -0.282              |
|               | Neuroticism             | 49.99 (10.59) |                     |                     | -0.072              |
|               | <i>F</i>                |               | 8.727**             | 5.961**             | 4.182**             |
|               | <i>R</i> <sup>2</sup>   |               | 0.056               | 0.143               | 0.173               |
|               | $\Delta R^2$            |               | 0.056**             | 0.087**             | 0.030               |
| <b>Female</b> |                         |               |                     |                     |                     |
| n = 220       | Physical violence       | 2.73 (2.83)   | 1.169**             | 0.955**             | 0.953**             |
|               | SSRS                    | 42.05 (7.79)  |                     | -0.057              | -0.066              |
|               | Positive coping of TCSQ | 29.58 (7.16)  |                     | -0.376**            | -0.376**            |
|               | Negative coping of TCSQ | 26.72 (7.78)  |                     | 0.296*              | 0.297*              |
|               | Extraversion            | 50.03 (10.54) |                     |                     | -0.121              |
|               | Psychoticism            | 50.14 (10.56) |                     |                     | 0.006               |
|               | Neuroticism             | 50.12 (10.20) |                     |                     | -0.005              |
|               | <i>F</i>                |               | 13.441**            | 7.488**             | 4.557**             |
|               | <i>R</i> <sup>2</sup>   |               | 0.058               | 0.122               | 0.131               |
|               | $\Delta R^2$            |               | 0.058**             | 0.064**             | 0.009               |

Note. SD = standard deviations; PTSD = post-traumatic stress disorder; SSRS = Social Support Rating Scale; TCSQ = Trait Coping Style Questionnaire.

\* $P < 0.05$ , \*\* $P < 0.01$

## DISCUSSION

In this cross-sectional hospital-based study of healthcare workers exposed to physical violence, we

1  
2  
3  
4 assessed the prevalence and correlates of PTSD symptoms. Our study found that the prevalence of  
5  
6 physical violence among the healthcare workers was approximately 13.6% in the previous year. The  
7  
8 results of a study conducted during 2009-2010 in Italy found that 13.4% of nurses were exposed to  
9  
10 physical violence,<sup>22</sup> which is similar to the frequency found in this study. However, other studies have  
11  
12 reported higher prevalence rates of physical violence than the current study.<sup>23-24</sup> The inconsistency in  
13  
14 these findings may be attributed to cultural differences between countries or missing reports. PTSD  
15  
16 was reported by 28.0% of the victims based on the scoring instructions of the PCL-C (i.e., 28.0%  
17  
18 scored 50 points and above). We selected the PCL-C score of 50 and above as the standard cut-off due  
19  
20 to the influence of traditional Chinese culture on the frequency of healthcare workers' encounters with  
21  
22 traumatic events and the DSM IV-TR criteria for PTSD.<sup>2</sup> Previous studies have provided valuable  
23  
24 information regarding the prevalence of PTSD among doctors and nurses.<sup>28-31</sup> The prevalence of PTSD  
25  
26 among the healthcare workers exposed physical violence in our study was similar to that reported in  
27  
28 Atlanta.<sup>55</sup> However, the prevalence rates of PTSD in these studies were different from the present  
29  
30 study,<sup>56-57</sup> which might be attributed to differences in the studies' sample characteristics, designs,  
31  
32 definitions, and diagnostic criteria for PTSD, due to their varied cultural backgrounds. Moreover, the  
33  
34 prevalence of PTSD symptoms in our sample was higher than that of the general population (8%) in the  
35  
36 USA.<sup>58</sup> This finding might be attributed to the fact that the general population's frequency of exposure  
37  
38 to serious traumatic events is lower than that of healthcare workers. Similarly, nurses who work in  
39  
40 intensive care units experience traumatic events more often than other healthcare workers do.<sup>29</sup>

41  
42 Our study found that 21.2% of the victims of physical violence were at risk for developing PTSD  
43  
44 and 28.0% met the full diagnostic criteria for PTSD. This finding suggests that physical violence had a  
45  
46 strong influence on the mental health of healthcare workers. Approximately 53.0% (195/368) of the  
47  
48  
49  
50  
51  
52  
53  
54  
55  
56  
57  
58  
59  
60

1  
2  
3  
4 victims reported having at least one PTSD criterion. The most commonly observed PTSD symptoms  
5  
6 was re-experiencing (45.1%), followed by hyper-arousal (37.8%), and then avoidance (35.1%). A  
7  
8 previous study also reported that healthcare workers in an emergency department were victims of direct  
9  
10 workplace violence because they reported re-experiencing the violent event, followed by hyper-arousal  
11  
12 and avoidance.<sup>28</sup> Laposa and Alden reported that re-experiencing an incident of physical violence was  
13  
14 significantly and negatively associated with emergency department workers' ability to accomplish their  
15  
16 work.<sup>28</sup> It is possible that the prevalence of symptoms of hyper-arousal and avoidance were not higher  
17  
18 due to the distinctive characteristics of the healthcare workers' jobs and the hospital's culture, which  
19  
20 required them to be able to shift their focus quickly and constantly. Healthcare workers who escaped  
21  
22 slight injury during an episode of physical violence had to shift their focus rapidly to another patient  
23  
24 after the event, and they could not avoid the work environment.<sup>28</sup>  
25  
26  
27  
28  
29  
30

31 As shown in the results of the Pearson's correlations and the hierarchical regression analysis,  
32  
33 social support had a significant negative association with PTSD symptoms, and this finding is  
34  
35 consistent with other research.<sup>9 36 52 53</sup> The level of PTSD symptoms was significantly and negatively  
36  
37 correlated with the healthcare workers' scores for objective support and utilization of support. A  
38  
39 previous study found that the Deterioration Model of Social Support has been useful in discriminating  
40  
41 the potential of stressors to reduce support.<sup>58</sup> They found that disaster-induced erosion of perceived  
42  
43 social support increased symptoms of depression among both primary and secondary victims; the loss  
44  
45 of perceived social support also mediated psychological consequences.<sup>59</sup> The Deterioration Deterrence  
46  
47 Model of Social Support which is similar to support-mobilization models, has been used to explain  
48  
49 how the perceived deterioration of social support can be counteracted by higher levels of received  
50  
51 social support.<sup>59-60</sup> If post-disaster support mobilization is implemented, stress should be positively  
52  
53  
54  
55  
56  
57  
58  
59  
60

1  
2  
3  
4 correlated with received support. At the same time, received support should be positively related to  
5  
6 perceived support. Therefore, the receipt of support should suppress a negative relationship between  
7  
8 stress and perceived support.<sup>59-60</sup> Victims of physical violence should be encouraged not to abandon  
9  
10 their daily social activities because these activities have many important functions (e.g., they help  
11  
12 people understand the needs of network members and inspire their participation in helping).<sup>60</sup> Daily  
13  
14 contact is the most natural forum for sharing experiences, which might suppress negative emotions,  
15  
16 provide opportunities for social comparison, and maintain a sense of friendship and feelings of being  
17  
18 accepted.<sup>60</sup> It is important to recognize that stress caused by violence is persistent. Yet, a supportive  
19  
20 hospital environment can help individuals cope with a wide range of stressful events and serve as a  
21  
22 buffer against their negative health effects.<sup>59-60</sup>  
23  
24  
25  
26  
27  
28

29 Another significant effect of coping styles on PTSD symptoms was found in the present study.  
30  
31 This result indicated that when healthcare workers encountered a traumatic event, a negative coping  
32  
33 style was more likely to increase their proneness to developing PTSD symptoms. This finding is  
34  
35 consistent with the results of other studies.<sup>36 50 53</sup> Positive coping was beneficial in preventing or  
36  
37 alleviating PTSD symptoms in our study. In contrast, a previous investigation found that activating  
38  
39 coping had a positive relationship with PTSD.<sup>36</sup> Unexpectedly, the three personality factors were not  
40  
41 significantly associated with PTSD symptoms. However, Lawrence and Fauerbach's study found that  
42  
43 individuals with higher Neuroticism scores exhibited more PTSD symptoms.<sup>36</sup>  
44  
45  
46  
47  
48

49 An important finding of the present study was revealed in the univariate analyses. We found that  
50  
51 the men exposed to traumatic events were more likely to exhibit PTSD symptoms than the women  
52  
53 were. This result was different from the findings reported in earlier studies that women are more likely  
54  
55 to develop PTSD symptoms.<sup>6 17 19</sup> This finding might be attributed to gender differences in responses to  
56  
57  
58  
59  
60

1  
2  
3  
4 different traumatic events and in social networks.<sup>61-62</sup> This phenomenon also might be attributable to  
5  
6 the fact that the injuries sustained by the men after experiencing physical violence were more severe  
7  
8 than those of the women. After experiencing physical violence, the women were likely to receive more  
9  
10 social support than the men suggesting that women were more often regarded as a vulnerable group.  
11  
12

13  
14 These findings suggest that social support, exposure to physical violence, and coping styles are  
15  
16 closely related to PTSD symptoms. Therefore, we recommend interventions based on the social  
17  
18 cognitive theory.<sup>63</sup> For example, social support has been found to be an important protective factor in  
19  
20 reducing stress and depression, and improving health.<sup>63</sup> After the occurrence of a traumatic event,  
21  
22 enabling function of social support can enhance self-efficacy, thereby promoting recovery from the  
23  
24 trauma.<sup>63</sup>  
25  
26  
27

28  
29 The present study has several limitations. First, we used the PCL-C to assess PTSD symptoms  
30  
31 rather than a standard clinical diagnostic method. Consequently, the prevalence of PTSD might be  
32  
33 overestimated. Second, the study's findings need to be replicated in a longitudinal study. Finally, our  
34  
35 results are specific to Chinese healthcare workers exposed to physical violence in the past 12 months;  
36  
37 thus, the low representativeness of the sample due to the use convenience sampling limits the generaliz  
38  
39 ability of the results. The inclusion of healthcare workers from a wider range of careers in a more  
40  
41 representative sample should contribute to the ability to generalize the results of future studies.  
42  
43  
44  
45  
46  
47

## 48 49 **CONCLUSIONS**

50  
51 The prevalence of PTSD among healthcare workers exposed physical violence was similar to that in  
52  
53 Atlanta. The positive effects of social support on PTSD symptoms suggest that social support has  
54  
55 practical implications for psychological interventions to promote mental health. Furthermore, the  
56  
57  
58  
59  
60

1  
2  
3  
4 coping styles of the healthcare workers in this study influenced the development of PTSD symptoms.  
5  
6 Therefore, it is imperative to use positive coping methods and to receive social support after  
7  
8 experiencing a traumatic event.  
9

#### 10 11 12 13 14 **Acknowledgments**

15  
16 The authors thank all the healthcare workers, managers and Chinese Hospital Association for their  
17  
18 assistance and support for this project.  
19

#### 20 21 22 **Author Contributions**

23  
24 LS and LF designed the study. LS, LW, XJ, BP and LF collected data. ZL, LW, XJ, HM, XL and AL  
25  
26 analysed the data. LS and LF drafted the manuscript. LS, ZL and LF revised the manuscript.  
27

#### 28 29 **Funding**

30  
31 This study was funded by the National Natural Science Foundation of China, grant number 71473063.  
32

33  
34 **Competing interests** None declared.  
35

36  
37 **Data sharing statement** No additional data are available.  
38  
39

#### 40 41 42 **REFERENCES**

- 43  
44 1. Guo W, Xue JM, Shao D, *et al*. Effect of the interplay between trauma severity and trait  
45  
46 neuroticism on posttraumatic stress disorder symptoms among adolescents exposed to a pipeline  
47  
48 explosion. *PLoS One* 2015;10(3):e0120493.  
49  
50  
51 2. Association AP. Diagnostic and statistical manual of mental disorders fourth edition, text revision  
52  
53 (DSM-IV-TR ). 2000.  
54  
55  
56 3. Andreasen NC. What is post-traumatic stress disorder? *Dialogues Clin Neurosci* 2011;13:240–243.  
57  
58  
59  
60



- 1  
2  
3  
4 4. Association AP. Diagnostic and statistical manual of mental disorders fifth edition, text revision  
5  
6 (DSM-V). 2013.  
7
- 8  
9 5. Van Der, Kolk BA. The psychobiology and psychopharmacology of PTSD. *Hum Psychopharmacol*  
10  
11 2001;16(S1):S49 – S64.  
12
- 13  
14 6. Shalev AY. Post-traumatic stress disorder. Disorder takes away human dignity and character.  
15  
16 *BMJ* 2001;322(7297):1301–1304.  
17
- 18  
19 7. Hu BS, Liang YX. Post-traumatic stress disorder. *J Occup Environ Hyg* 1997;(5):266-269.  
20
- 21  
22 8. Klein S, Alexander DA. Epidemiology and presentation of post-traumatic disorders. *Psychiatry*  
23  
24 2009;8(8):282-287.  
25
- 26  
27 9. Fan F, Zhang Y, Yang Y, *et al.* Symptoms of posttraumatic stress disorder, depression, and  
28  
29 anxiety among adolescents following the 2008 Wenchuan earthquake in China. *J Trauma Stress*  
30  
31 2011;24(1): 44–53.  
32
- 33  
34 10. Boe HJ, Holgersen KH, Holen A. Mental health outcomes and predictors of chronic disorders  
35  
36 after the North Sea oil rig disaster: 27-year longitudinal follow-up study. *J Nerv Ment Dis*  
37  
38 2011;199(1):49–54.  
39
- 40  
41 11. Wang YL, Xie W, Yang ZH, *et al.* Research progress of posttraumatic stress disorder in China.  
42  
43 *Chinese Journal of Applied Psychology* 2005;11(2):176-180.  
44
- 45  
46 12. Alexander DA, Klein S. Ambulance personnel and critical incidents: impact of accident and  
47  
48 emergency work on mental health and emotional well-being. *Brit J Psychia* 2001;178(1):76.  
49
- 50  
51 13. Jonsson A, Segesten K, Mattsson B. Post-traumatic stress among Swedish ambulance personnel.  
52  
53 *Emerg Med J* 2003;20(1):79-84.  
54
- 55  
56 14. Laposa JM, Alden LE, Fullerton LM. Work stress and posttraumatic stress disorder in ED nurses  
57  
58

- 1  
2  
3  
4 /personnel. *J Emerg Nurs* 2003;29(1):23-28.
- 5  
6 15. Shoji K, Lesnierowska M, Smoktunowicz E, *et al.* What Comes First, Job Burnout or Secondary  
7  
8 Traumatic Stress? Findings from Two Longitudinal Studies from the U.S. and Poland. *Plos One*  
9  
10 2015;10(8):e0136730.
- 11  
12  
13 16. Boer JD, Lok A, Verlaat EV, *et al.* Work-related critical incidents in hospital-based health care  
14  
15 providers and the risk of post-traumatic stress symptoms, anxiety, and depression: A  
16  
17 meta-analysis. *Soc Sci Med* 2011;73(2):316-326.
- 18  
19  
20  
21 17. Krug EG, Mercy JA, Dahlberg LL, *et al.* The world report on violence and health. *Lancet* 2002;  
22  
23 360(9339):1083.
- 24  
25  
26 18. Ray MM. The dark side of the job: Violence in the emergency department. *J Emerg Nurs* 2007;33  
27  
28 :257-261.
- 29  
30  
31 19. Ahmad M, Al-Rimawi R, Masadeh A, *et al.* Workplace Violence by Patients and their Families  
32  
33 against Nurses: Literature Review. *Int J Nurs Termin CI* 2015;2(4):46-55.
- 34  
35  
36 20. Ramacciati N, Ceccagnoli A, Addey B. Violence against nurses in the triage area: An Italian  
37  
38 qualitative study. *Int Emerg Nurs* 2015;23(4):274-280.
- 39  
40  
41 21. Harrell, Erika. Workplace Violence, 1993-2009: National Crime Victimization Survey and the  
42  
43 Census of Fatal Occupational Injuries. *Digitalcommons* 2011.
- 44  
45  
46 22. Magnavita N, Heponiemi T. Workplace violence against nursing students and nurses: an Italian  
47  
48 experience. *J Nurs Scholarsh* 2011;43(2):203-210.
- 49  
50  
51 23. Fute M, Mengesha ZB, Wakgari N, *et al.* High prevalence of workplace violence among nurses  
52  
53 working at public health facilities in Southern Ethiopia. *BMC Nurs* 2015;14:9.
- 54  
55  
56 24. Al-Omari H. Physical and verbal workplace violence against nurses in Jordan. *Int Nurs Rev*  
57  
58

- 1  
2  
3  
4 2015;62(1):111–118.
- 5  
6 25. Schablon A, Zeh A, Wendeler D, *et al.* Frequency and consequences of violence and aggression  
7  
8 towards employees in the German healthcare and welfare system: a cross-sectional study. *BMJ*  
9  
10 *Open* 2011;2(5):421-421.
- 11  
12  
13 26. Najafi F, Fallahi-Khoshknab M, Dalvandi A, *et al.* Workplace violence against Iranian nurses: A  
14  
15 systematic review. *J Health Promot Manage* 2014;3:72-85.
- 16  
17  
18 27. Pan Y, Yang XH, He JP, *et al.* To be or not to be a doctor, that is the question: a review of serious  
19  
20 incidents of violence against doctors in China from 2003–2013. *J public health* 2015;23(2):111  
21  
22 -116
- 23  
24  
25 28. Laposa JM, Alden LE. Posttraumatic stress disorder in the emergency room: exploration of a  
26  
27 cognitive model. *Behav Res Ther* 2003;41(1):49-65.
- 28  
29  
30 29. Mills LD, Mills TJ. Symptoms of post-traumatic stress disorder among emergency medicine  
31  
32 residents. *J Emerg Med* 2005;28(1):1–4.
- 33  
34  
35 30. Friedman, MJ, Resick, PA, Bryant, R.A, *et al.* Considering PTSD for DSM-5. *Depress Anxiety*  
36  
37 2011;28(9):750-769.
- 38  
39  
40 31. Robertson N, Perry A. Institutionally based health care workers' exposure to traumatogenic  
41  
42 events: Systematic review of PTSD presentation. *Journal of Traumatic Stress* 2010;23(3):417-  
43  
44 420.
- 45  
46  
47 32. Kornblith AB, Herndon JE, Weiss RB, *et al.* Long-term adjustment of survivors of early-stage  
48  
49 breast carcinoma, 20 years after adjuvant chemotherapy. *Cancer* 2003;98(4):679–689.
- 50  
51  
52 33. Rourke MT, Hobbie WL, Schwartz L, *et al.* Posttraumatic stress disorder (PTSD) in young  
53  
54 adult survivors of childhood cancer. *Pediatr Blood Cancer* 2007; 49(2): 177–82.
- 55  
56  
57  
58  
59  
60

- 1  
2  
3  
4 34. Perrin M, Vandeleur C L, Castelao E, *et al.* Determinants of the development of post-traumatic  
5  
6 stress disorder, in the general population. *Soc Psych Psych Epid* 2014;49(3):447-457.  
7  
8  
9 35. Breslau N, Davis G C, Andreski P, *et al.* Traumatic events and posttraumatic stress disorder in an  
10  
11 urban population of young adults. *Arch Gen Psychiatry* 1991;48(3):216-222.  
12  
13  
14 36. Lawrence JW, Fauerbach JA. Personality, coping, chronic stress, social support and PTSD  
15  
16 symptoms among adult burn survivors: a path analysis. *J Burn Care Rehabil* 2003;24(1):63.  
17  
18  
19 37. Kerasiotis B, Motta RW. Assessment of PTSD symptoms in emergency room, intensive care unit,  
20  
21 and general floor nurses. *Int J Emerg Ment Health* 2004;6(3):121-133.  
22  
23  
24 38. Boer JD, Lok A, Verlaat EV, *et al.* Work-related critical incidents in hospital-based health care  
25  
26 providers and the risk of post-traumatic stress symptoms, anxiety, and depression: A meta-analys  
27  
28 is. *Soc Scie Med* 2011;73(2):316-326.  
29  
30  
31 39. Shoji K, Lesniewska M, Smoktunowicz E, *et al.* What Comes First, Job Burnout or Secondary  
32  
33 Traumatic Stress? Findings from Two Longitudinal Studies from the U.S. and Poland. *Plos One*  
34  
35 2015;10(8):e0136730.  
36  
37  
38  
39 40. Cieslak R, Anderson V, Bock J, *et al.* Secondary traumatic stress among mental health providers  
40  
41 working with the military: Prevalence and its work- and exposure-related correlates. *J Nerv*  
42  
43 *Ment Dis* 2013;201(11):917-25.  
44  
45  
46 41. ILO/ICN/WHO/PSI. Framework Guidelines for Addressing Workplace Violence in the Health  
47  
48 Sector. Geneva: ILO/ICN/WHO/PSI Joint Programme on Workplace Violence in the Health  
49  
50 Sector; 2002.  
51  
52  
53  
54 42. Zampieron A, Galeazzo M, Turra S, *et al.* Perceived aggression towards nurses: study in two  
55  
56 Italian health institutions. *J Clin Nurs* 2010;19:2329-41.  
57  
58  
59  
60

- 1  
2  
3  
4  
5  
6  
7  
8  
9  
10  
11  
12  
13  
14  
15  
16  
17  
18  
19  
20  
21  
22  
23  
24  
25  
26  
27  
28  
29  
30  
31  
32  
33  
34  
35  
36  
37  
38  
39  
40  
41  
42  
43  
44  
45  
46  
47  
48  
49  
50  
51  
52  
53  
54  
55  
56  
57  
58  
59  
60
43. Battles ED. An exploration of post-traumatic stress disorder in emergency nurses following Hurricane Katrina. *J Emerg Nurs* 2007;33(4):314-318.
  44. Dirk Richter K B. Post-traumatic stress disorder following patient assaults among staff members of mental health hospitals: a prospective longitudinal study. *BMC Psychiatry* 2006;6(1):15.
  45. Weathers FW, Litz BT, Herman DS, *et al.* The PTSD checklist: reliability, validity & diagnostic utility. Paper presented at the Annual Meeting of the International Society for Traumatic Stress Studies, *San Antonio, TX* 1993.
  46. Wu Z, Xu J, Sui Y. Posttraumatic stress disorder and posttraumatic growth coexistence and the risk factors in Wenchuan earthquake survivors. *Psychiatry Res* 2016; 237:49-54.
  47. Qian M, Wu G, Zhu R, *et al.* Development of the revised Eysenck Personality Questionnaire Short Scale for Chinese (EPQ-RSC). *Acta Psychologica Sinica* 2000;32(3):317-323.
  48. Zhang Z, Shi Z, Wang L, *et al.* Post-traumatic stress disorder, anxiety and depression among the elderly: a survey of the hard-hit areas a year after the Wenchuan earthquake. *Stress Health* 2012; 28(1):61-68.
  49. Cui Y, Tian SS, Qiao N, *et al.* Associations of Individual-Related and Job-Related Risk Factors with Nonfatal Occupational Injury in the Coal Workers of Shanxi Province: A Cross-Sectional Study. *PLoS One* 2015;10(7):e0134367.
  50. Zhang L, Zhang J X, Wen-Juan X U, *et al.* An evaluation of validity and reliability on the trait coping style questionnaire(TCSQ) using for Chinese soldier. *Chinese Journal of Disease Control & Prevention* 2010.
  51. Li-Na L I, Zhao Y, Cui X J, *et al.* The Influence Factors and Status on Male Vicarious Trauma of Disaster. *Chinese General Practice* 2014.

- 1  
2  
3  
4 52. Feng S, Tan H, Benjamin A, *et al.* Social support and posttraumatic stress disorder among flood  
5  
6 victims in Hunan, China. *Ann Epidemiol.* 2007;17(10):827-833.  
7  
8  
9 53. Li H, Yan C, Zhu S, *et al.* Correlation among coping style, social support, and negative emotion  
10  
11 in infertile women. *Zhong nan da xue xue bao. Yi xue ban=Journal of Central South University.*  
12  
13 *Medical sciences* 2011;36(2):138-142.  
14  
15  
16 54. Chang-Fei LU, Jia CX, Zhang JY, *et al.* Reliability and validity of Social Support Rating Scale  
17  
18 in rural suicides. *Chinese Mental Health Journal* 2011;25(3):218-222.  
19  
20  
21 55. Mealer ML, Shelton A, Berg B, *et al.* Increased prevalence of post-traumatic stress disorder  
22  
23 symptoms in critical care nurses. *Am J Resp Crit Care* 2007;175(175):693-697.  
24  
25  
26 56. Zafar W, Khan UR, Siddiqui SA, *et al.* Workplace Violence and Self-reported Psychological  
27  
28 Health: Coping with Post-traumatic Stress, Mental Distress, and Burnout among Physicians  
29  
30 Working in the Emergency Departments Compared to Other Specialties in Pakistan. *J Emerg*  
31  
32 *Med* 2015;50(1):167-177.  
33  
34  
35  
36 57. Johansen VA, Eilertsen DE, Nordanger D, *et al.* Prevalence, comorbidity and stability of  
37  
38 post-traumatic stress disorder and anxiety and depression symptoms after exposure to physical  
39  
40 assault: an 8-year prospective longitudinal study. *Nord J Psychiatry* 2013; 67(1):69-80.  
41  
42  
43 58. BreslauN. The epidemiology of post-traumatic stress disorder; what is the extent of the problem?  
44  
45 *Journal of Clinical Psychiatric* 2001;62:16-22.  
46  
47  
48 59. Kaniasty K, Norris FH. Mobilization and deterioration of social support following natural  
49  
50 disasters. *Current Directions in Psychological Science* 1995;4(3):94-98.  
51  
52  
53 60. Norris FH, Kaniasty K. Received and perceived social support in times of stress: a test of the  
54  
55 social support deterioration deterrence model. *Journal of Personality & Social Psychology*  
56  
57  
58  
59  
60

1  
2  
3  
4  
5  
6  
7  
8  
9  
10  
11  
12  
13  
14  
15  
16  
17  
18  
19  
20  
21  
22  
23  
24  
25  
26  
27  
28  
29  
30  
31  
32  
33  
34  
35  
36  
37  
38  
39  
40  
41  
42  
43  
44  
45  
46  
47  
48  
49  
50  
51  
52  
53  
54  
55  
56  
57  
58  
59  
60

1996;71(3):498-511.

61. Freedman SA, Gluck N, Tuval-Mashiach R, *et al.* Gender differences in responses to traumatic events: a prospective study. *J Trauma Stress* 2002;15:407-413.
62. Pratchett LC, Pelcovitz MR, Yehuda R. Trauma and violence: are women the weaker sex? *Psychiatr Clin North Am* 2010; 33: 465–474.
63. Benight CC, Bandura A. Social cognitive theory of posttraumatic recovery: the role of perceived self-efficacy. *Behaviour Research & Therapy* 2004;42(10):1129.



STROBE 2007 (v4) Statement—Checklist of items that should be included in reports of *cross-sectional studies*

| Section/Topic        | Item # | Recommendation                                                                                                                           | Reported on page #                          |
|----------------------|--------|------------------------------------------------------------------------------------------------------------------------------------------|---------------------------------------------|
| Title and abstract   | 1      | (a) Indicate the study's design with a commonly used term in the title or the abstract                                                   | Page 1, line 6;<br>p. 2 , line 21           |
|                      |        | (b) Provide in the abstract an informative and balanced summary of what was done and what was found                                      | P.2 ; p.3, line 6-17                        |
| <b>Introduction</b>  |        |                                                                                                                                          |                                             |
| Background/rationale | 2      | Explain the scientific background and rationale for the investigation being reported                                                     | P.4; p.5; p.6, line 4-32                    |
| Objectives           | 3      | State specific objectives, including any prespecified hypotheses                                                                         | P.6, line 34-39                             |
| <b>Methods</b>       |        |                                                                                                                                          |                                             |
| Study design         | 4      | Present key elements of study design early in the paper                                                                                  | P.7, line 14-24                             |
| Setting              | 5      | Describe the setting, locations, and relevant dates, including periods of recruitment, exposure, follow-up, and data collection          | P.6, line 47-58; p.7, line 4-14; line 24-39 |
| Participants         | 6      | (a) Give the eligibility criteria, and the sources and methods of selection of participants                                              | P.7, line 42-57; p.8, 4                     |
| Variables            | 7      | Clearly define all outcomes, exposures, predictors, potential confounders, and effect modifiers. Give diagnostic criteria, if applicable | P.8, line 11-29                             |
| Data sources/        | 8*     | For each variable of interest, give sources of data and details of methods of assessment (measurement). Describe                         | P.8, line 31-57; p.9;                       |

|                        |     |                                                                                                                                                                                                   |                                                   |
|------------------------|-----|---------------------------------------------------------------------------------------------------------------------------------------------------------------------------------------------------|---------------------------------------------------|
| measurement            |     | comparability of assessment methods if there is more than one group                                                                                                                               | p.10; p. 11, line 4-39                            |
| Bias                   | 9   | Describe any efforts to address potential sources of bias                                                                                                                                         | P.6, line 57; p.7,line 4                          |
| Study size             | 10  | Explain how the study size was arrived at                                                                                                                                                         | P.7, line 24-32                                   |
| Quantitative variables | 11  | Explain how quantitative variables were handled in the analyses. If applicable, describe which groupings were chosen and why                                                                      | p.11, line 52-17; p.12, line 4-6; P.6, line 11-31 |
| Statistical methods    | 12  | (a) Describe all statistical methods, including those used to control for confounding                                                                                                             | P.11, line 52-57; p. 12, line 2-24                |
|                        |     | (b) Describe any methods used to examine subgroups and interactions                                                                                                                               | P.12, line 4-16                                   |
|                        |     | (c) Explain how missing data were addressed                                                                                                                                                       | P.11, line 47-52                                  |
|                        |     | (d) If applicable, describe analytical methods taking account of sampling strategy                                                                                                                | P.12, line 4-16                                   |
|                        |     | (e) Describe any sensitivity analyses                                                                                                                                                             | P.11, line 54; p.12, line 16-24                   |
| <b>Results</b>         |     |                                                                                                                                                                                                   |                                                   |
| Participants           | 13* | (a) Report numbers of individuals at each stage of study—eg numbers potentially eligible, examined for eligibility, confirmed eligible, included in the study, completing follow-up, and analysed | P.13, line 42-47                                  |
|                        |     | (b) Give reasons for non-participation at each stage                                                                                                                                              | P.7, line 47-57                                   |
|                        |     | (c) Consider use of a flow diagram                                                                                                                                                                | No                                                |
| Descriptive data       | 14* | (a) Give characteristics of study participants (eg demographic, clinical, social) and information on exposures and potential confounders                                                          | P.13; p.14                                        |

|                          |     |                                                                                                                                                                                                              |                                      |
|--------------------------|-----|--------------------------------------------------------------------------------------------------------------------------------------------------------------------------------------------------------------|--------------------------------------|
|                          |     | (b) Indicate number of participants with missing data for each variable of interest                                                                                                                          | P.11, line 47-49                     |
| Outcome data             | 15* | Report numbers of outcome events or summary measures                                                                                                                                                         | P.15, line 4-50                      |
| Main results             | 16  | (a) Give unadjusted estimates and, if applicable, confounder-adjusted estimates and their precision (eg, 95% confidence interval). Make clear which confounders were adjusted for and why they were included | P.17, line 17-58;<br>p.18, line 3-47 |
|                          |     | (b) Report category boundaries when continuous variables were categorized                                                                                                                                    | P.8, line 9-29                       |
|                          |     | (c) If relevant, consider translating estimates of relative risk into absolute risk for a meaningful time period                                                                                             | P.13, line42-59;<br>p.14; p.16       |
| Other analyses           | 17  | Report other analyses done—eg analyses of subgroups and interactions, and sensitivity analyses                                                                                                               | P.17, line 16-44                     |
| <b>Discussion</b>        |     |                                                                                                                                                                                                              |                                      |
| Key results              | 18  | Summarise key results with reference to study objectives                                                                                                                                                     | P.18, line 54-57;<br>p.19. Line 4-9  |
| Limitations              | 19  | Discuss limitations of the study, taking into account sources of potential bias or imprecision. Discuss both direction and magnitude of any potential bias                                                   | P. 22, Line 27-42                    |
| Interpretation           | 20  | Give a cautious overall interpretation of results considering objectives, limitations, multiplicity of analyses, results from similar studies, and other relevant evidence                                   | P.19; p.20; p.21;<br>p.22, line4-42  |
| Generalisability         | 21  | Discuss the generalisability (external validity) of the study results                                                                                                                                        | P.22, line 12-42                     |
| <b>Other information</b> |     |                                                                                                                                                                                                              |                                      |
| Funding                  | 22  | Give the source of funding and the role of the funders for the present study and, if applicable, for the original study on which the present article is based                                                | P.23, line 27-29                     |

\*Give information separately for cases and controls in case-control studies and, if applicable, for exposed and unexposed groups in cohort and cross-sectional studies.

1  
2  
3  
4  
5  
6 **Note:** An Explanation and Elaboration article discusses each checklist item and gives methodological background and published examples of transparent reporting. The STROBE  
7 checklist is best used in conjunction with this article (freely available on the Web sites of PLoS Medicine at <http://www.plosmedicine.org/>, Annals of Internal Medicine at  
8 <http://www.annals.org/>, and Epidemiology at <http://www.epidem.com/>). Information on the STROBE Initiative is available at [www.strobe-statement.org](http://www.strobe-statement.org).  
9  
10  
11  
12  
13  
14  
15  
16  
17  
18  
19  
20  
21  
22  
23  
24  
25  
26  
27  
28  
29  
30  
31  
32  
33  
34  
35  
36  
37  
38  
39  
40  
41  
42  
43  
44  
45  
46  
47  
48  
49

For peer review only

# BMJ Open

## Prevalence and correlates of symptoms of post-traumatic stress disorder among Chinese healthcare workers exposed to physical violence: a cross-sectional study

|                                 |                                                                                                                                                                                                                                                                                    |
|---------------------------------|------------------------------------------------------------------------------------------------------------------------------------------------------------------------------------------------------------------------------------------------------------------------------------|
| Journal:                        | <i>BMJ Open</i>                                                                                                                                                                                                                                                                    |
| Manuscript ID                   | bmjopen-2017-016810.R2                                                                                                                                                                                                                                                             |
| Article Type:                   | Research                                                                                                                                                                                                                                                                           |
| Date Submitted by the Author:   | 25-Jun-2017                                                                                                                                                                                                                                                                        |
| Complete List of Authors:       | Shi, Lei<br>Wang, Lingling ; Chinese Hospital Association, Department of Autonomous Protection<br>Jia, Xiaoli<br>Li, Zhe<br>Mu, Huitong<br>Liu, Xin<br>Peng, Boshi<br>Li, Anqi<br>Fan, Lihua; Harbin Medical University, Department of Health Management , School of Public Health |
| <b>Primary Subject Heading</b>: | Health policy                                                                                                                                                                                                                                                                      |
| Secondary Subject Heading:      | Health policy, Health services research, Mental health                                                                                                                                                                                                                             |
| Keywords:                       | Posttraumatic stress disorder symptoms (PTSD), physical violence, social support, coping styles, MENTAL HEALTH, personality                                                                                                                                                        |
|                                 |                                                                                                                                                                                                                                                                                    |

SCHOLARONE™  
Manuscripts

1  
2  
3  
4 **Prevalence and correlates of symptoms of post-traumatic stress disorder among**  
5  
6 **Chinese healthcare workers exposed to physical violence: a cross-sectional study**  
7  
8

9  
10  
11 Lei Shi,<sup>1</sup> Lingling Wang,<sup>2</sup> Xiaoli Jia,<sup>2</sup> Zhe Li,<sup>1</sup> Huitong Mu,<sup>1</sup> Xin Liu,<sup>1</sup> Boshi Peng,<sup>3</sup> Anqi Li,<sup>1</sup> Lihua Fan<sup>1</sup>  
12  
13

14  
15  
16 **Correspondence to:** Lihua Fan, School of Public Health, Harbin Medical University, 157 Baojian  
17  
18 Road, Nangang District, Harbin 150081, China; E-mail: [lihuafan@126.com](mailto:lihuafan@126.com)  
19  
20

21  
22  
23 <sup>1</sup>Department of Health Management, School of Public Health, Harbin Medical University, Harbin,  
24  
25 Heilongjiang, China  
26

27  
28  
29 <sup>2</sup>Department of Autonomous Protection, Chinese Hospital Association, Beijing, China  
30  
31

32  
33 <sup>3</sup>Department of Scientific Research, The Second Affiliated Hospital of Harbin Medical University,  
34  
35 Harbin, Heilongjiang, China  
36  
37  
38  
39  
40  
41  
42  
43  
44  
45  
46  
47  
48  
49  
50  
51  
52  
53  
54  
55  
56  
57  
58  
59  
60

**Abstract****Objectives**

Post-traumatic stress disorder (PTSD) is a common psychological maladjustment to undergoing a traumatic event. Our aim was to measure the prevalence of PTSD among Chinese healthcare workers exposed to physical violence, and explore the associations of their demographic characteristics, social support, personality traits, and coping styles with their PTSD symptoms.

**Methods**

A cross-sectional study was conducted using the: Workplace Violence Scale, Posttraumatic Stress Disorder Checklist–Civilian Version (PCL–C), Social Support Rating Scale (SSRS), Revised Eysenck Personality Questionnaire–Short Scale and Trait Coping Style Questionnaire. We used convenience sampling method to collect data from March 2015 to September 2016. Healthcare workers (N = 2,706) from 39 public hospitals located in Heilongjiang, Hebei, and Beijing Provinces of China completed the questionnaires (effective response rate = 84.25%).

**Results**

Overall, the prevalence of physical violence in the previous 12 months was 13.60% (N = 2,706). The prevalence of PTSD among the healthcare workers who experienced physical violence was 28.0% (n = 368). Most of the victims of physical violence (50.80%) did not exhibit PTSD symptoms based on their PCL–C scores, and 47.0% did not manifest the diagnostic criteria for PTSD after experiencing physical violence. The level of PTSD symptoms was negatively correlated with their scores on the SSRS ( $r = -0.188$ ,  $P < 0.001$ ). The hierarchical regression analysis (Block 3) revealed that in women, positive coping was significantly associated with PTSD symptoms ( $\beta = -0.376$ ,  $P = 0.001$ ). However, the effect of positive coping was not significant in men.



## Conclusions

The results suggest that the aftermath of physical violence contributes to current prevalence of PTSD.

The positive effects of social support on PTSD symptoms suggest that it has practical implications for interventions to promote psychological health. The healthcare workers' coping styles influenced the development of PTSD symptoms. Therefore, adopting effective coping styles and receiving social support have potential roles in the recovery from trauma after experiencing physical violence.

## Strengths and limitations of this study

- In China, few studies have been conducted on PTSD symptoms following healthcare workers' exposure to physical violence.
- We assessed the prevalence of PTSD and explored the correlates of PTSD symptoms among Chinese healthcare workers exposed to physical violence.
- Our study was conducted at 39 public hospitals in three provinces using convenience sampling. Therefore, the representativeness of the sample is limited.
- The retrospective approach to collecting data using self-reports of PTSD symptoms might have led to recall and report bias.

## BACKGROUND

Post-traumatic stress disorder (PTSD) is a psychological state of imbalance, characterized by a series of chronic emotional reactions to a traumatic event, including re-experiencing, avoidance, and heightened arousal, as outlined in the Diagnostic and Statistical Manual of Psychiatric Disorders—4<sup>th</sup> edition (DSM-IV).<sup>1-3</sup> However, the criteria for PTSD in the manual's fifth edition (DSM-5) include not three but four symptom clusters: re-experiencing, avoidance, negative alterations in mood and cognition, and hyperarousal.<sup>4</sup> It is worth noting that PTSD has shifted from its classification as an anxiety disorder in the DSM-IV to a new category of Trauma and Stress-related Disorders in the DSM-5.<sup>4</sup> Although a substantial number of studies indicate that almost all people exhibit intrusive and repetitive symptoms after exposure to excessive stress,<sup>5</sup> only a small percentage develop avoidance and hyper-arousal symptoms. Most individuals showing PTSD symptoms after exposure to a traumatic event recover within weeks or months. However, 10%–25% might develop chronic PTSD that lasts for several months or years, or even a lifetime.<sup>6</sup>

PTSD originated from reports of the war-related trauma, and was applied gradually to a variety of man-made and natural disasters.<sup>7</sup> Scholars have reported that the incidence of PTSD among male and female Vietnam veterans in the USA is 15.2% and 8.5%, respectively.<sup>8</sup> Moreover, most of the Chinese studies on PTSD have focused on wars, traffic accidents, and natural disasters.<sup>9-10</sup> Differences in the incidence rates of PTSD for different types of trauma have been reported in China. For instance, the prevalence of PTSD has been reported to be 8.65% among soldiers assigned to military vehicles at high altitudes, 33.89% among flood-disaster survivors, 18.8% among earthquake survivors, 41% among traffic-accident survivors, and 78.6% among survivors of a serious explosions.<sup>11</sup>

PTSD symptoms and the full range of criteria comprising a PTSD diagnosis have been observed

1  
2  
3  
4 in rescue and ambulance personnel.<sup>12-13</sup> Healthcare workers typically are exposed to two types of  
5  
6 trauma in the hospital setting: direct (personal involvement in traumatic events through confrontations  
7  
8 resulting in their own traumatic experiences e.g., workplace violence) and indirect (non-personal  
9  
10 involvement in traumatic events through others' confrontations resulting in other people's traumatic  
11  
12 experiences e.g., witnessing other people's direct experiences of workplace violence, caring for dying  
13  
14 patients, and threats of severe injury or exposure to trauma).<sup>4 14-16</sup> In the present study, a traumatic event  
15  
16 refers to a healthcare worker's exposure to physical violence in the workplace. Workplace violence is  
17  
18 divided into physical and psychological violence.<sup>17</sup> Physical violence causes more serious physical and  
19  
20 psychological damage (e.g., PTSD, anxiety, fear, and depression) than other forms of violence.<sup>18-20</sup>  
21  
22 Physical violence refers to the use of physical force against an individual or a group, and can lead to  
23  
24 physical, psychological, or sexual harm; it includes hitting, shooting, kicking, slapping, pushing, biting,  
25  
26 pinching, wounding using sharp objects, and sexual assault and rape.<sup>17</sup> Approximately 50% of  
27  
28 healthcare workers have experienced at least one violent incident during their working lives.<sup>21</sup> During  
29  
30 the past 12 months, the incidence rate of physical violence for nurses in different countries has ranged  
31  
32 from 9.1% to 56.0%.<sup>22-25</sup> The results of a systematic review of studies conducted in Iran indicated that  
33  
34 the most common types of physical violence experienced by 43% of participants were pushing or  
35  
36 pinching.<sup>26</sup> In China, physician-patient conflicts present a growing trend, with an increase in the  
37  
38 number of healthcare workers killed by patients or their relatives to 24, and an increase in injuries from  
39  
40 2003 to 2013.<sup>27</sup> Several studies have estimated the prevalence of PTSD among emergency department  
41  
42 staff to range from 10% to 25%.<sup>28-30</sup> Noelle Robertson and Andrew Perry conducted a systematic  
43  
44 review of PTSD research investigations; the results showed that the prevalence of PTSD ranged from 8%  
45  
46 to 29% among different hospital-based departments.<sup>31</sup> There are also reports of the occurrence of  
47  
48  
49  
50  
51  
52  
53  
54  
55  
56  
57  
58  
59  
60

1  
2  
3  
4 PTSD among Chinese nurses working in emergency departments, intensive care units, and operating  
5  
6 rooms. However, the number of research studies on PTSD among healthcare workers has been  
7  
8 relatively few in China.  
9

10  
11 Demographic variables (e.g., age, gender, and educational level) and psychological and social  
12  
13 variables (e.g., personality, coping style, and social support) have been found to be significantly  
14  
15 associated with cancer-related PTSD symptoms.<sup>32-33</sup> Previous studies have found that the risk of PTSD  
16  
17 was most strongly associated with neuroticism and problem-focused coping strategies in the general  
18  
19 population.<sup>34-35</sup> Neuroticism was the most critical personality dimension in predicting PTSD, and  
20  
21 avoidant coping and social support mediated the relationship between neuroticism and PTSD in a high  
22  
23 proportion of adult-burn survivors.<sup>36</sup> Social support has been reported to play a significant role in  
24  
25 helping nurses cope with work-related stress.<sup>37</sup> A meta-analysis indicated that work-related critical  
26  
27 incidents were positively related to PTSD symptoms.<sup>38</sup>  
28  
29  
30  
31  
32

33  
34 In this study, we aimed to assess the prevalence of PTSD, and to explore the associations of  
35  
36 demographic characteristics, social support, personality characteristics, and coping styles with PTSD  
37  
38 symptoms among Chinese healthcare workers exposed to physical violence.  
39  
40  
41  
42

## 43 44 **METHODS**

### 45 46 **Participants and Procedures**

47  
48 A cross-sectional study was conducted from March 2015 through September 2016 with a sample of  
49  
50 healthcare workers employed by 39 public hospitals located in Heilongjiang, Hebei, and Beijing  
51  
52 Provinces of China. The 39 public hospitals that served as the research settings were chosen using  
53  
54 convenience sampling. All investigators were trained using a uniform survey manual before they began  
55  
56  
57  
58  
59  
60

1  
2  
3  
4 to collect data. Qualified investigators were appointed to collect data. We obtained permission from the  
5  
6 managers and the medical dispute resolution and human resources departments of the hospitals. The  
7  
8 investigators conducted face-to-face surveys by using an anonymous, self-administered questionnaire.  
9  
10  
11 We purposely selected 3 public hospitals in Harbin (the First Affiliated Hospital of Harbin Medical  
12  
13 University, the Second Affiliated Hospital of Harbin Medical University, and the Fourth Affiliated  
14  
15 Hospital of Harbin Medical University) as the sites for our pilot study before the formal investigation.  
16  
17 A total of 150 questionnaires were distributed and returned (these data were excluded from the main  
18  
19 study). A total of 3,212 healthcare workers (i.e., physicians, nurses and medical technicians) were  
20  
21 investigated using convenience sampling in the formal investigation. The researchers and hospital  
22  
23 coordinators distributed and collected the questionnaires that were completed by the healthcare workers  
24  
25 immediately. A total of 2,706 valid questionnaires were returned, and the effective response rate was  
26  
27 84.25%. This study's focus was only on PTSD symptoms among healthcare workers exposed to  
28  
29 physical violence; thus, only 368 responses were considered valid data and were analyzed in the  
30  
31 present study.  
32  
33  
34  
35  
36  
37  
38

39 The inclusion criteria for participation in this study were as follows: (1) at least one year of work  
40  
41 experience; (2) voluntary participation; (3) participation would not affect the participation's work; and  
42  
43 (4) experience of physical violence in the previous 12 months. Individuals were excluded if they (1)  
44  
45 had received any psychological treatment after experiencing physical violence; (2) experienced other  
46  
47 traumatic events, including workplace psychological violence or serious life events (e.g., domestic  
48  
49 violence or attacks by criminals), serious accidents (e.g., fires, explosions, or traffic accidents), natural  
50  
51 disasters (e.g., typhoons, earthquakes, or floods), or (3) were indirectly exposed to trauma,<sup>39-40</sup> (e.g.,  
52  
53 witnessing other people experience traumatic events).  
54  
55  
56  
57  
58  
59  
60

## Questionnaire

### *Demographic characteristics*

Demographic data on the healthcare workers were collected, including gender, age, marital status, educational status, professional title, department, occupation, and work experience. Age was categorized as  $\leq 30$ , 31–50, and  $\geq 51$  years old. Marital status was categorized as married and single/divorced/widowed. Educational status was classified as junior college or below, undergraduate, and graduate. Occupation was divided into three groups: physician, nurse, and medical technician. Professional title was categorized as primary, intermediate, and senior. Department was classified as emergency department, internal medicine, surgery, obstetrics and gynecology, pediatrics, and other. Work experience was divided into four categories:  $\leq 4$ , 5–10, 11–20, and  $\geq 21$  years.

### *Workplace Violence Scale*

The Workplace Violence (WPV) Scale developed by the International Labour Office, International Council of Nurses, World Health Organization, and Public Services International Joint Programme on Workplace Violence in the Health Sector in 2003 and the revised Survey of Violence Experienced by Staff were used to measure workplace violence.<sup>41-42</sup> We obtained permission to use these scales. The scale used in this study consists of 2 dimensions (physical violence and psychological violence) and has 9 items that were adopted from these scales. Each item is scored on a 4-point scale reflecting respondents' frequency of exposure to violence (0 = 0 times, 1 = 1 time, 2 = 2–3 times, and 3 =  $\geq 4$  times). The total possible score ranges from 0 to 27, with a higher total score indicating a higher frequency of exposure to WPV. The physical violence subscale consists of 6 items, thus, the total possible score ranges from 1 to 18. In the present study, Cronbach's  $\alpha$  for the WPV Scale was 0.86.

### *PTSD*

1  
2  
3  
4 The PTSD Checklist–Civilian Version (PCL–C), which has been used to measure PTSD symptoms  
5  
6 among healthcare workers was used in the present study.<sup>43–44</sup> It consists of 17 self–report items, which  
7  
8 comprise three dimensions, namely, re–experiencing, avoidance/numbing and hyper–arousal. The three  
9  
10 dimensions correspond to the DSM–IV symptoms criteria for PTSD.<sup>2</sup> The response options for each  
11  
12 item on the PCL–C are rated from 1 (not at all) to 5 (extremely), based on the extent to which the  
13  
14 respondent has been troubled by specific symptoms in the past month. The total possible score is  
15  
16 calculated by adding the scores for all items, and it ranges from 17 to 85 points, with a higher score  
17  
18 indicating a higher risk for PTSD symptoms. A total score  $\geq 50$  is indicative of the full PTSD diagnosis  
19  
20 (sensitivity = 0.82; specificity = 0.83; kappa = 0.64).<sup>45</sup> In this study, the traumatic event in the original  
21  
22 PCL–C was replaced by physical violence. The reliability and validity of this instrument have been  
23  
24 shown to be high in a wide range of Chinese samples.<sup>46</sup> The present study revealed that Cronbach’s  $\alpha$   
25  
26 for the PCL–C was 0.934, and for the three subscales it was 0.872 (re–experiencing), 0.921 (avoidance),  
27  
28 and 0.926 (hyper–arousal).  
29  
30  
31  
32  
33  
34  
35

### 36 ***Revised Eysenck Personality Questionnaire–Short Scale***

37  
38 Personality traits were measured using the Revised Eysenck Personality Questionnaire–Short Scale for  
39  
40 Chinese (EPQ–RSC).<sup>47–48</sup> The EPQ–RSC consists of 48 items, categorized into 4 subscales reflecting  
41  
42 personality traits: Extraversion, Neuroticism, Psychoticism, and Lie. Each item is scored on a  
43  
44 dichotomous scale (1=Yes, 0=No) to measure personality characteristics. The scores of the positively  
45  
46 and negatively worded items are summed in accordance with each personality trait. Early studies found  
47  
48 the EPQ–RSC to have high reliability and validity as a measure of personality traits in China.<sup>48–49</sup> The  
49  
50 total score for the Extraversion subscale indicates introversion when it is less than 43.3, intermediate  
51  
52 when it is from 43.3 to 56.7, and extraversion when it is greater than 56.7.<sup>49</sup> For the Psychoticism  
53  
54  
55  
56  
57  
58  
59  
60



1  
2  
3  
4 subscale, tough-minded is defined as a total score greater than 56.7; intermediate is defined as a total  
5  
6 score between 43.3 and 56.7, and mild is defined as a total score less than 43.3.<sup>49</sup> For the Neuroticism  
7  
8 subscale, a total score of less than 43.3 defines emotional stability, whereas a total score from 43.3 to  
9  
10 56.7 defines intermediate, and a total score greater than 56.7 defines emotional instability.<sup>49</sup> For the Lie  
11  
12 subscale, a total score of 60 or greater indicates that information provided by the respondent might  
13  
14 beunreliable.<sup>49</sup> In this study, Cronbach's  $\alpha$  for the EPQ-RSC was 0.903. The internal consistency  
15  
16 coefficients were 0.854, 0.756, 0.791, and 0.762, for the Extraversion, Neuroticism, Psychoticism, and  
17  
18 Lie subscales, respectively.  
19  
20  
21  
22

### 23 ***Trait Coping Style Questionnaire***

24  
25  
26 The Trait Coping Style Questionnaire (TCSQ) was used in this study to assess participants' style of  
27  
28 coping with life events.<sup>37-50</sup> The TCSQ consists of 20 items, including 10 items measuring positive  
29  
30 coping and 10 items measuring negative coping. Positive coping refers to individuals who, when faced  
31  
32 with a problem, tend to deal with it in a positive way, and are able to quickly forget unpleasant aspects.  
33  
34 Negative coping refers to the tendency to use negative coping methods to deal with problems and vent  
35  
36 frustrations to other people, which makes it is easier to ignore unpleasant thoughts. For example, when  
37  
38 conflicts with others, arise, individuals who use negative coping will ignore the opposing side for a  
39  
40 long time.<sup>51</sup> Each item is rated on a 5-point Likert scale. The total possible score for positive and  
41  
42 negative coping is calculated by adding the scores for all the items. Previous studies have found the  
43  
44 TCSQ to have high reliability and validity as a measure of coping style in China.<sup>50-51</sup> In this study,  
45  
46 Cronbach's  $\alpha$  for the total scale was 0.845, and the internal consistency coefficients of the subscales  
47  
48 were  $\alpha = 0.823$  (positive coping), and  $\alpha = 0.863$  (negative coping).  
49  
50  
51  
52  
53  
54  
55

### 56 ***Social Support Rating Scale***

1  
2  
3  
4 Social support was evaluated using the Chinese version of the Social Support Rating Scale (SSRS),<sup>52-54</sup>  
5  
6 which is a brief measure of the overall situation of respondents' social support. This 10-item scale is  
7  
8 divided into 3 dimensions: subjective support, objective support and utilization of support. Subjective  
9  
10 support refers to an individual's emotional experience of being respected, supported, and understood by  
11  
12 their social group, and it is closely related to the individual's subjective feelings. Objective support  
13  
14 refers to visible support, including material and direct assistance, social networks, group relationships,  
15  
16 and the individual's degree of participation in societal activities with family, friends, and colleagues  
17  
18 (e.g., marriage). A low level of social support is defined as a total score between 12 and 44, an  
19  
20 intermediate level as a total score between 45 and 54, and high level as a total score greater than 55.<sup>54</sup>  
21  
22  
23  
24  
25  
26 The present study revealed that Cronbach's  $\alpha$  for the SSRS was 0.865, and for the three subscales it  
27  
28 was 0.884 (subjective support), 0.911 (objective support), and 0.875 (the availability of support).  
29  
30  
31  
32

### 33 34 **Data Analysis**

35  
36 EpiData version 3.1 was used to establish the study's database. We eliminated the questions with  
37  
38 missing data or quality issues. To ensure accuracy, two trained personnel entered the data after all the  
39  
40 surveys were completed. IBM SPSS Version 19.0 and Excel were used for the data analysis. The  
41  
42 normal distributions of the continuous variables were verified using P-P plots and K-S tests.  
43  
44 Descriptive statistics, including numbers (n), percentages (%), means, and standard deviations (SD)  
45  
46 were calculated for the demographic variables. We used one-way analysis of variance (ANOVA) or  
47  
48 independent sample t-tests to compare group differences on the measures of the continuous variables.  
49  
50 The chi-square ( $\chi^2$ ) test was used to compare differences in the categorical variables. Pearson's  
51  
52 correlations were used to examine correlations among the continuous variables. Hierarchical regression  
53  
54  
55  
56  
57  
58  
59  
60

analysis was used to examine the associations of the demographic characteristics and the scores on the SSRS, EPQ-RSC, and TCSQ with PTSD symptoms. Statistics, including F values,  $R^2$ ,  $R^2$ -changes ( $\Delta R^2$ ), standardized regression coefficients ( $\beta$ ), and P-values for each step in the regression model were reported. All the study variables were tested for multicollinearity. A P-value  $<0.05$  was considered to be statistically significance.

### STROBE Statement

We declared that the STROBE (Strengthening the Reporting of Observational Studies in Epidemiology) guidelines are followed in this study.

### Ethical Considerations

Ethical approval to conduct this study was granted by the Research Ethics Committee of Harbin Medical University, and informed consent was obtained from each hospital and healthcare worker involved in the investigation. All of the participants gave their informed consent before the survey; they were assured that their personal information would be kept confidential.

## RESULTS

### Demographic Characteristics of the Respondents

The demographic characteristics of the respondents are shown in Table 1.

**Table 1. Demographic characteristics of the respondents (N=2706).**

| Demographic variables |           | n    | %    |
|-----------------------|-----------|------|------|
| Gender                | Male      | 623  | 23.0 |
|                       | Female    | 2083 | 77.0 |
| Age group             | $\leq 30$ | 1258 | 46.5 |
|                       | 31–50     | 1341 | 49.5 |

|                     |                           |      |      |
|---------------------|---------------------------|------|------|
|                     | ≥ 51                      | 107  | 4.0  |
| Educational level   | Junior college or below   | 856  | 31.6 |
|                     | Undergraduate             | 1341 | 49.6 |
|                     | Graduate                  | 509  | 18.8 |
| Marital status      | Married                   | 1859 | 68.7 |
|                     | Single/divorced/widowed   | 847  | 31.3 |
| Occupation          | Physician                 | 1058 | 39.1 |
|                     | Nurse                     | 1520 | 56.2 |
|                     | Medical Technician        | 128  | 4.7  |
| Technical title     | Primary                   | 1147 | 42.4 |
|                     | Intermediate              | 1026 | 37.9 |
|                     | Senior                    | 533  | 19.7 |
| Department          | Emergency Department      | 323  | 11.9 |
|                     | Internal Medicine         | 813  | 30.0 |
|                     | Surgery                   | 752  | 27.8 |
|                     | Obstetrics and Gynecology | 276  | 10.2 |
|                     | Pediatrics                | 218  | 8.1  |
| Years of experience | Other                     | 324  | 12.0 |
|                     | ≤ 4                       | 1014 | 37.5 |
|                     | 5–10                      | 820  | 30.3 |
|                     | 11–20                     | 503  | 18.6 |
|                     | ≥ 21                      | 369  | 13.6 |

### Characteristics of the Victims in Relation to PTSD Symptoms

Of the 368 victims of physical violence, 59.8% were women, 51.3% completed an undergraduate education, and 73.9% were married. The characteristics of the victims in relation to PTSD symptoms are presented in Table 2.

**Table 2. Characteristics of victims in relation to PTSD symptoms (N=368).**

| Variables         |                         | n   | %    | PTSD symptoms |       | F/t   | P     |
|-------------------|-------------------------|-----|------|---------------|-------|-------|-------|
|                   |                         |     |      | Mean          | SD    |       |       |
|                   |                         |     |      | Gender        | Male  |       |       |
|                   | Female                  | 220 | 59.8 | 38.30         | 13.71 |       |       |
| Age group         | ≤ 30                    | 133 | 36.1 | 38.09         | 13.36 | 2.946 | 0.054 |
|                   | 31–50                   | 216 | 58.7 | 42.01         | 15.56 |       |       |
|                   | ≥ 51                    | 19  | 5.2  | 42.10         | 17.80 |       |       |
| Educational level | Junior college or below | 118 | 32.1 | 38.14         | 13.54 | 2.592 | 0.076 |
|                   | Undergraduate           | 189 | 51.3 | 42.13         | 15.46 |       |       |
|                   | Graduate                | 61  | 16.6 | 40.64         | 15.85 |       |       |
| Marital status    | Married                 | 272 | 73.9 | 41.51         | 15.75 | 2.195 | 0.029 |
|                   | Single/divorced/widowed | 96  | 26.1 | 38.03         | 12.38 |       |       |

|                        |                           |     |      |       |       |       |       |
|------------------------|---------------------------|-----|------|-------|-------|-------|-------|
| Occupation             | Physician                 | 175 | 47.6 | 42.97 | 15.37 | 4.379 | 0.013 |
|                        | Nurse                     | 180 | 48.9 | 38.29 | 13.82 |       |       |
|                        | Medical Technician        | 13  | 3.5  | 40.69 | 21.24 |       |       |
| Technical title        | Primary                   | 145 | 39.4 | 39.56 | 13.04 | 0.576 | 0.562 |
|                        | Intermediate              | 126 | 34.2 | 41.32 | 16.21 |       |       |
|                        | Senior                    | 97  | 26.4 | 41.23 | 16.16 |       |       |
| Department             | Emergency Department      | 68  | 18.5 | 41.46 | 16.08 | 0.722 | 0.607 |
|                        | Internal Medicine         | 76  | 20.7 | 38.45 | 15.07 |       |       |
|                        | Surgery                   | 123 | 33.4 | 41.53 | 13.91 |       |       |
|                        | Obstetrics and Gynecology | 19  | 5.2  | 41.63 | 16.52 |       |       |
|                        | Pediatrics                | 27  | 7.3  | 37.63 | 10.37 |       |       |
|                        | Other                     | 55  | 14.9 | 41.55 | 17.28 |       |       |
| Years of experience    | ≤ 4                       | 101 | 27.4 | 37.19 | 13.25 | 2.158 | 0.063 |
|                        | 5–10                      | 120 | 32.6 | 42.13 | 14.52 |       |       |
|                        | 11–20                     | 87  | 23.7 | 41.90 | 16.80 |       |       |
|                        | ≥ 21                      | 60  | 16.3 | 41.42 | 15.46 |       |       |
| Social support         | Low                       | 224 | 60.9 | 42.41 | 15.06 | 5.904 | 0.003 |
|                        | Medium                    | 130 | 35.3 | 38.52 | 14.40 |       |       |
|                        | High                      | 14  | 3.8  | 31.00 | 14.53 |       |       |
| Subjective support     | Low                       | 22  | 6.0  | 41.91 | 18.63 | 0.859 | 0.425 |
|                        | Medium                    | 38  | 10.3 | 43.37 | 12.93 |       |       |
|                        | High                      | 308 | 83.7 | 40.17 | 14.97 |       |       |
| Objective support      | Low                       | 206 | 56.0 | 42.19 | 15.47 | 3.369 | 0.035 |
|                        | Medium                    | 155 | 42.1 | 38.87 | 14.32 |       |       |
|                        | High                      | 7   | 1.9  | 32.00 | 9.24  |       |       |
| Utilization of support | Low                       | 39  | 10.6 | 48.18 | 16.98 | 6.979 | 0.001 |
|                        | Medium                    | 259 | 70.4 | 40.37 | 14.56 |       |       |
|                        | High                      | 70  | 19.0 | 37.24 | 14.23 |       |       |
| Extraversion           | Introversion              | 102 | 27.7 | 39.45 | 13.35 | 1.278 | 0.280 |
|                        | Middle                    | 164 | 44.6 | 41.99 | 16.04 |       |       |
|                        | Extraversion              | 102 | 27.7 | 39.51 | 14.80 |       |       |
| Psychoticism           | Mild                      | 68  | 18.5 | 42.22 | 16.87 | 0.998 | 0.370 |
|                        | Middle                    | 213 | 57.9 | 40.79 | 15.24 |       |       |
|                        | Tough-minded              | 87  | 23.6 | 38.86 | 12.69 |       |       |
| Neuroticism            | Emotional instability     | 100 | 27.2 | 40.33 | 13.80 | 0.530 | 0.589 |
|                        | Middle                    | 153 | 41.6 | 41.50 | 16.72 |       |       |
|                        | Emotional stability       | 115 | 31.2 | 39.63 | 13.60 |       |       |

Note. PTSD = post-traumatic stress disorder; SD = standard deviations.

### Prevalence of Physical Violence in the Previous 12 Months

During the past 12 months, the prevalence of physical violence and psychological violence toward healthcare workers were 13.60% (368/2706) and 59.64% (1614/2706), respectively. The respondents

reported that the patients' relatives were the main perpetrators (67.4%, n = 248), followed by the patients (23.6%, n = 87).

### Prevalence of PTSD

The PTSD symptoms based on the victims' PCL-C scores are summarized in Table 3. According to their scores on the PCL-C, 103 victims (28.0%) met the full criteria for a PTSD diagnosis and 21.2% of victims were at risk for developing PTSD.

According to the DSM IV-TR criteria for PTSD,<sup>2</sup> 47.0% of the victims did not appear to manifest the diagnostic criteria. Re-experiencing was the most frequently observed criterion for PTSD observed among the victims (45.1%), followed by hyper-arousal (37.8%).

**Table 3. Sample description and prevalence of PTSD.**

| PTSD symptoms                                    | Physical violence |      |
|--------------------------------------------------|-------------------|------|
|                                                  | n                 | %    |
| <b>PTSD symptoms based on PCL-C scores</b>       |                   |      |
| No obvious PTSD symptoms (17-37)                 | 187               | 50.8 |
| Criteria met for potential risk of PTSD (38-49)  | 78                | 21.2 |
| Criteria met for the full PTSD diagnosis (50-85) | 103               | 28.0 |
| <b>PTSD symptoms based on PTSD criterion *</b>   |                   |      |
| No criterion manifestation                       | 173               | 47.0 |
| Re-experiencing (Criterion B)                    | 166               | 45.1 |
| Avoidance (Criterion C)                          | 129               | 35.1 |
| Hyper-arousal (Criterion D)                      | 139               | 37.8 |

Note. PTSD = post-traumatic stress disorder; PCL-C = PTSD Checklist-Civilian Version.

\*Participants may have more than one criteria.

### Correlations of the EPQ-RSC, TCSQ and SSRS Scores with PTSD Symptoms

Table 4 shows the correlations among the victims' PTSD symptoms and scores on the EPQ-RSC, TCSQ, SRSS, and the physical violence subscale. The mean score for PTSD symptoms on the PCL-C was 40.60 (SD = 15.01). As expected, the level of PTSD symptoms was negatively correlated with respondents' scores on the SSRS ( $r = -0.188$ ,  $P < 0.001$ ) and positive coping subscale of the TCSQ ( $r = -0.164$ ,  $P = 0.002$ ), respectively. Physical violence was positively associated with PTSD symptoms

**Table 4. Pearson correlations among PTSD symptoms, EPQ–RSC, TCSQ, SSRS and Physical Violence.**

| Variables                  | Mean  | SD    | 1       | 2       | 3       | 4       | 5       | 6       | 7       | 8       | 9       | 10    | 11   | 12    | 13     | 14 |
|----------------------------|-------|-------|---------|---------|---------|---------|---------|---------|---------|---------|---------|-------|------|-------|--------|----|
| 1.PTSD symptoms            | 40.60 | 15.01 | -       |         |         |         |         |         |         |         |         |       |      |       |        |    |
| 2.Re-experiencing          | 12.43 | 4.92  | 0.89**  | -       |         |         |         |         |         |         |         |       |      |       |        |    |
| 3.Avoidance                | 15.70 | 5.99  | 0.94**  | 0.77**  | -       |         |         |         |         |         |         |       |      |       |        |    |
| 4.Hyper-arousal            | 12.46 | 5.48  | 0.91**  | 0.70**  | 0.79**  | -       |         |         |         |         |         |       |      |       |        |    |
| 5.Physical violence        | 3.08  | 2.99  | 0.26**  | 0.22**  | 0.31**  | 0.18**  | -       |         |         |         |         |       |      |       |        |    |
| 6.SSRS                     | 41.73 | 8.44  | -0.19** | -0.12** | -0.22** | -0.17** | -0.12** | -       |         |         |         |       |      |       |        |    |
| 7.Subjective support       | 25.23 | 5.14  | -0.09   | -0.02   | -0.13*  | -0.09   | 0.01    | 0.89**  | -       |         |         |       |      |       |        |    |
| 8.Objective support        | 8.63  | 3.30  | -0.21** | -0.17** | -0.23** | -0.17** | -0.20** | 0.77**  | 0.46**  | -       |         |       |      |       |        |    |
| 9.Utilization of support   | 7.87  | 2.01  | -0.21** | -0.15** | -0.22** | -0.20** | -0.21** | 0.66**  | 0.43**  | 0.40**  | -       |       |      |       |        |    |
| 10.Positive coping of TCSQ | 30.05 | 7.22  | -0.16** | -0.15** | -0.12*  | -0.18** | -0.13*  | 0.10    | 0.04    | 0.10*   | 0.15**  | -     |      |       |        |    |
| 11.Negative coping of TCSQ | 26.92 | 7.33  | 0.19**  | 0.10    | 0.19**  | 0.22**  | 0.04    | -0.31** | -0.26** | -0.29** | -0.17** | 0.12* | -    |       |        |    |
| 12.Extraversion            | 49.81 | 10.33 | -0.01   | -0.03   | 0.01    | -0.01   | 0.06    | -0.05   | -0.02   | -0.08   | -0.02   | -0.04 | 0.02 | -     |        |    |
| 13.Psychoticism            | 50.10 | 9.81  | 0.06    | 0.06    | 0.06    | 0.04    | 0.00    | 0.02    | 0.02    | 0.06    | 0.02    | 0.02  | 0.04 | -0.02 | -      |    |
| 14.Neuroticism             | 50.07 | 10.34 | 0.03    | 0.04    | 0.01    | 0.05    | 0.03    | 0.03    | 0.01    | 0.05    | 0.04    | 0.01  | 0.04 | -0.09 | 0.20** | -  |

Note. SD = standard deviations; PTSD = post-traumatic stress disorder; EPQ–RSC = Eysenck Personality Questionnaire–Revised Short Scale for Chinese; SSRS = Social Support Rating Scale; TCSQ = Trait Coping Style Questionnaire.

\* $P < 0.05$ , \*\* $P < 0.01$

( $r = 0.259$ ,  $P < 0.001$ ). The level of PTSD symptoms was positively correlated with victims' scores on the negative coping subscale of the TCSQ ( $r = 0.188$ ,  $P < 0.001$ ).

### Hierarchical Regression Analysis of Factors Related to PTSD Symptoms

The results of the hierarchical regression analysis are presented in Table 5. Variables that had a statistically significant association with PTSD were used as control variables. Gender had a significant effect on PTSD symptoms in the model (Block 1). As shown in Block 2, physical violence was positively associated with PTSD symptoms ( $\beta = 1.216$ ,  $P < 0.001$ ). As shown in Block 3, positive coping as measured by the TCSQ was negatively associated with PTSD symptoms ( $\beta = -0.327$ ,  $P = 0.002$ ), whereas, negative coping was positively associated with PTSD symptoms in the regression model ( $\beta = 0.353$ ,  $P = 0.001$ ). Furthermore, gender had a significant effect on PTSD symptoms, and men were more vulnerable to PTSD symptoms than women (Table 1). Therefore, we explored the potential correlates of PTSD symptoms in men and women (Table 6). As shown in Block 3, among the women, positive coping as measured by the TCSQ, was significantly associated with PTSD symptoms ( $\beta = -0.376$ ,  $P = 0.001$ ), but the effect of positive coping was not significant in men.

**Table 5. Hierarchical regression for exploring the correlates of PTSD symptoms.**

| Variables               | Block 1 ( $\beta$ ) | Block 2 ( $\beta$ ) | Block 3 ( $\beta$ ) | Block 4 ( $\beta$ ) |
|-------------------------|---------------------|---------------------|---------------------|---------------------|
| Gender                  | -4.663*             | -3.282              | -3.060              | -3.012              |
| Marital status          | -2.021              | -1.859              | -2.626              | -2.798              |
| Occupation              | -1.274              | -1.918              | -2.494              | -2.414              |
| Physical violence       |                     | 1.216**             | 1.015**             | 1.028**             |
| SSRS                    |                     |                     | -0.193*             | -0.192*             |
| Positive coping of TCSQ |                     |                     | -0.327**            | -0.325**            |
| Negative coping of TCSQ |                     |                     | 0.353**             | 0.361**             |
| Extraversion            |                     |                     |                     | -0.049              |
| Psychoticism            |                     |                     |                     | 0.081               |
| Neuroticism             |                     |                     |                     | 0.042               |
| <i>F</i>                | 5.189**             | 9.886**             | 10.544**            | 11.584**            |
| <i>R</i> <sup>2</sup>   | 0.041               | 0.098               | 0.170               | 0.246               |
| $\Delta R^2$            | 0.041               | 0.057**             | 0.072**             | 0.076*              |

Note. PTSD = post-traumatic stress disorder; SSRS = Social Support Rating Scale; TCSQ = Trait



Coping Style Questionnaire.

\* $P < 0.05$ , \*\* $P < 0.01$

**Table 6. Hierarchical regression for exploring the correlates of PTSD symptoms in men and women, respectively.**

|         | Variables               | Mean (SD)     | Block 1 ( $\beta$ ) | Block 2 ( $\beta$ ) | Block 3 ( $\beta$ ) |
|---------|-------------------------|---------------|---------------------|---------------------|---------------------|
| Male    |                         |               |                     |                     |                     |
| n = 148 | Physical violence       | 3.60 (3.16)   | 1.216**             | 1.033*              | 1.073**             |
|         | SSRS                    | 41.25 (9.32)  |                     | -0.255              | -0.257              |
|         | Positive coping of TCSQ | 30.75 (7.28)  |                     | -0.298              | -0.318              |
|         | Negative coping of TCSQ | 27.21 (6.61)  |                     | 0.467*              | 0.479*              |
|         | Extraversion            | 49.18 (10.04) |                     |                     | 0.062               |
|         | Psychoticism            | 50.02 (8.62)  |                     |                     | -0.282              |
|         | Neuroticism             | 49.99 (10.59) |                     |                     | -0.072              |
|         | $F$                     |               | 8.727**             | 5.961**             | 4.182**             |
|         | $R^2$                   |               | 0.056               | 0.143               | 0.173               |
|         | $\Delta R^2$            |               | 0.056**             | 0.087**             | 0.030               |
| Female  |                         |               |                     |                     |                     |
| n = 220 | Physical violence       | 2.73 (2.83)   | 1.169**             | 0.955**             | 0.953**             |
|         | SSRS                    | 42.05 (7.79)  |                     | -0.057              | -0.066              |
|         | Positive coping of TCSQ | 29.58 (7.16)  |                     | -0.376**            | -0.376**            |
|         | Negative coping of TCSQ | 26.72 (7.78)  |                     | 0.296*              | 0.297*              |
|         | Extraversion            | 50.03 (10.54) |                     |                     | -0.121              |
|         | Psychoticism            | 50.14 (10.56) |                     |                     | 0.006               |
|         | Neuroticism             | 50.12 (10.20) |                     |                     | -0.005              |
|         | $F$                     |               | 13.441**            | 7.488**             | 4.557**             |
|         | $R^2$                   |               | 0.058               | 0.122               | 0.131               |
|         | $\Delta R^2$            |               | 0.058**             | 0.064**             | 0.009               |

Note. SD = standard deviations; PTSD = post-traumatic stress disorder; SSRS = Social Support Rating Scale; TCSQ = Trait Coping Style Questionnaire.

\* $P < 0.05$ , \*\* $P < 0.01$

## DISCUSSION

In this cross-sectional hospital-based study of healthcare workers exposed to physical violence, we assessed the prevalence and correlates of PTSD symptoms. Our study found that the prevalence of physical violence among the healthcare workers was approximately 13.6% in the previous year. The results of a study conducted during 2009–2010 in Italy found that 13.4% of nurses were exposed to physical violence,<sup>22</sup> which is similar to the frequency found in this study. However, other studies have

1  
2  
3  
4 reported higher prevalence rates of physical violence than the current study.<sup>23-24</sup> The inconsistency in  
5  
6 these findings may be attributed to cultural differences between countries or missing reports. PTSD  
7  
8 was reported by 28.0% of the victims based on the scoring instructions of the PCL-C (i.e., 28.0%  
9  
10 scored 50 points and above). We selected the PCL-C score of 50 and above as the standard cut-off due  
11  
12 to the influence of traditional Chinese culture on the frequency of healthcare workers' encounters with  
13  
14 traumatic events and the DSM IV-TR criteria for PTSD.<sup>2</sup> Previous studies have provided valuable  
15  
16 information regarding the prevalence of PTSD among doctors and nurses.<sup>28-31</sup> The prevalence of PTSD  
17  
18 among the healthcare workers exposed physical violence in our study was similar to that reported in  
19  
20 Atlanta.<sup>55</sup> However, the prevalence rates of PTSD in these studies were different from the present  
21  
22 study,<sup>56-57</sup> which might be attributed to differences in the studies' sample characteristics, designs,  
23  
24 definitions, and diagnostic criteria for PTSD, due to their varied cultural backgrounds. Moreover, the  
25  
26 prevalence of PTSD symptoms in our sample was higher than that of the general population (8%) in the  
27  
28 USA.<sup>58</sup> This finding might be attributed to the fact that the general population's frequency of exposure  
29  
30 to serious traumatic events is lower than that of healthcare workers. Similarly, nurses who work in  
31  
32 intensive care units experience traumatic events more often than other healthcare workers do.<sup>29</sup>  
33  
34  
35  
36  
37  
38  
39  
40

41 Our study found that 21.2% of the victims of physical violence were at risk for developing PTSD  
42  
43 and 28.0% met the full diagnostic criteria for PTSD. This finding suggests that physical violence had a  
44  
45 strong influence on the mental health of healthcare workers. Approximately 53.0% (195/368) of the  
46  
47 victims reported having at least one PTSD criterion. The most commonly observed PTSD symptom  
48  
49 was re-experiencing (45.1%), followed by hyper-arousal (37.8%), and then avoidance (35.1%). A  
50  
51 previous study also reported that healthcare workers in an emergency department were victims of direct  
52  
53 workplace violence because they reported re-experiencing the violent event, followed by  
54  
55  
56  
57  
58  
59  
60

1  
2  
3  
4 hyper-arousal and avoidance.<sup>28</sup> Laposa and Alden reported that re-experiencing an incident of physical  
5  
6 violence was significantly and negatively associated with emergency department workers' ability to  
7  
8 accomplish their work.<sup>28</sup> It is possible that the prevalence of symptoms of hyper-arousal and avoidance  
9  
10 were not higher due to the distinctive characteristics of the healthcare workers' jobs and the hospital's  
11  
12 culture, which required them to be able to shift their focus quickly and constantly. Healthcare workers  
13  
14 who escaped slight injury during an episode of physical violence had to shift their focus rapidly to  
15  
16 another patient after the event, and they could not avoid the work environment.<sup>28</sup>  
17  
18  
19

20  
21 As shown in the results of the Pearson's correlations and the hierarchical regression analysis,  
22  
23 social support had a significant negative association with PTSD symptoms, and this finding is  
24  
25 consistent with other research.<sup>9 36 52 53</sup> The level of PTSD symptoms was significantly and negatively  
26  
27 correlated with the healthcare workers' scores for objective support and utilization of support. A  
28  
29 previous study found that the Deterioration Model of Social Support has been useful in discriminating  
30  
31 the potential of stressors to reduce support.<sup>58</sup> They found that disaster-induced erosion of perceived  
32  
33 social support increased symptoms of depression among both primary and secondary victims; the loss  
34  
35 of perceived social support also mediated psychological consequences.<sup>59</sup> The Deterioration Deterrence  
36  
37 Model of Social Support, which is similar to support-mobilization models, has been used to explain  
38  
39 how the perceived deterioration of social support can be counteracted by higher levels of received  
40  
41 social support.<sup>59-60</sup> If post-disaster support mobilization is implemented, stress should be positively  
42  
43 correlated with received support. At the same time, received support should be positively related to  
44  
45 perceived support. Therefore, the receipt of support should suppress a negative relationship between  
46  
47 stress and perceived support.<sup>59-60</sup> Victims of physical violence should be encouraged not to abandon  
48  
49 their daily social activities because these activities have many important functions (e.g., they help  
50  
51  
52  
53  
54  
55  
56  
57  
58  
59  
60

1  
2  
3  
4 people understand the needs of network members and inspire their participation in helping).<sup>60</sup> Daily  
5  
6 contact is the most natural forum for sharing experiences, which might suppress negative emotions,  
7  
8 provide opportunities for social comparison, and maintain a sense of friendship and feelings of being  
9  
10 accepted.<sup>60</sup> It is important to recognize that stress caused by violence is persistent. Yet, a supportive  
11  
12 hospital environment can help individuals cope with a wide range of stressful events and serve as a  
13  
14 buffer against their negative health effects.<sup>59-60</sup>  
15  
16

17  
18 Another significant effect of coping styles on PTSD symptoms was found in the present study.  
19  
20 This result indicated that when healthcare workers encountered a traumatic event, a negative coping  
21  
22 style was more likely to increase their proneness to developing PTSD symptoms. This finding is  
23  
24 consistent with the results of other studies.<sup>36 50 53</sup> Positive coping was beneficial in preventing or  
25  
26 alleviating PTSD symptoms in our study. In contrast, a previous investigation found that activating  
27  
28 coping had a positive relationship with PTSD.<sup>36</sup> Unexpectedly, the three personality factors were not  
29  
30 significantly associated with PTSD symptoms. However, Lawrence and Fauerbach's study found that  
31  
32 individuals with higher Neuroticism scores exhibited more PTSD symptoms.<sup>36</sup>  
33  
34  
35  
36  
37  
38

39 An important finding of the present study was revealed in the univariate analyses. We found that  
40  
41 the men exposed to traumatic events were more likely to exhibit PTSD symptoms than the women  
42  
43 were. This result was different from the findings reported in earlier studies that women are more likely  
44  
45 to develop PTSD symptoms.<sup>6 17 19</sup> This finding might be attributed to gender differences in responses to  
46  
47 different traumatic events and in social networks.<sup>61-62</sup> This phenomenon also might be attributable to  
48  
49 the fact that the injuries sustained by the men after experiencing physical violence were more severe  
50  
51 than those of the women. After experiencing physical violence, the women were likely to receive more  
52  
53 social support than the men suggesting that women were more often regarded as a vulnerable group.  
54  
55  
56  
57  
58  
59  
60

1  
2  
3  
4 These findings suggest that social support, exposure to physical violence, and coping styles are  
5  
6 closely related to PTSD symptoms. Therefore, we recommend interventions based on the social  
7  
8 cognitive theory.<sup>63</sup> For example, social support has been found to be an important protective factor in  
9  
10 reducing stress and depression, and improving health.<sup>63</sup> After the occurrence of a traumatic event,  
11  
12 enabling function of social support can enhance self-efficacy, thereby promoting recovery from the  
13  
14 trauma.<sup>63</sup>

15  
16  
17  
18 The present study has several limitations. First, we used the PCL-C to assess PTSD symptoms  
19  
20 rather than a standard clinical diagnostic method. Consequently, the prevalence of PTSD might be  
21  
22 overestimated. Second, the study's findings need to be replicated in a longitudinal study. Finally,  
23  
24 convenience sampling is a non-probability sampling method and the results of this study are specific to  
25  
26 Chinese healthcare workers exposed to physical violence in the past 12-months. Thus, the low  
27  
28 representativeness of the sample due to the use of convenience sampling limits the generalizability of the  
29  
30 results. The inclusion of healthcare workers from a wider range of careers in a more representative  
31  
32 sample should contribute to the ability to generalize the results of future studies.  
33  
34  
35  
36  
37  
38  
39  
40

## 41 CONCLUSIONS

42  
43  
44 The results suggest that the aftermath of physical violence contributes to the current prevalence of  
45  
46 PTSD. The positive effects of social support on PTSD symptoms suggest that social support has  
47  
48 practical implications for psychological interventions to promote mental health. Furthermore, the  
49  
50 coping styles of the healthcare workers in this study influenced the development of PTSD symptoms.  
51  
52  
53 Therefore, it is imperative to use positive coping methods and to receive social support after  
54  
55 experiencing a traumatic event.  
56  
57  
58  
59  
60

### Acknowledgments

The authors thank all the healthcare workers, managers and Chinese Hospital Association for their assistance and support for this project.

### Author Contributions

LS and LF designed the study. LS, LW, XJ, BP and LF collected data. ZL, LW, XJ, HM, XL and AL analysed the data. LS and LF drafted the manuscript. LS, ZL and LF revised the manuscript.

### Funding

This study was funded by the National Natural Science Foundation of China, grant number 71473063.

**Competing interests** None declared.

**Data sharing statement** No additional data are available.

### REFERENCES

1. Guo W, Xue JM, Shao D, *et al.* Effect of the interplay between trauma severity and trait neuroticism on posttraumatic stress disorder symptoms among adolescents exposed to a pipeline explosion. *PLoS One* 2015;10(3):e0120493.
2. Association AP. Diagnostic and statistical manual of mental disorders fourth edition, text revision (DSM-IV-TR ). 2000.
3. Andreasen NC. What is post-traumatic stress disorder? *Dialogues Clin Neurosci* 2011;13:240–243.
4. Association AP. Diagnostic and statistical manual of mental disorders fifth edition, text revision (DSM-V). 2013.
5. Van Der, Kolk BA. The psychobiology and psychopharmacology of PTSD. *Hum Psychopharmacol* 2001;16(S1):S49 – S64.

- 1  
2  
3  
4 6. Shalev AY. Post-traumatic stress disorder. Disorder takes away human dignity and character.  
5  
6 *BMJ* 2001;322(7297):1301–1304.  
7
- 8  
9 7. Hu BS, Liang YX. Post-traumatic stress disorder. *J Occup Environ Hyg* 1997;(5):266-269.  
10
- 11 8. Klein S, Alexander DA. Epidemiology and presentation of post-traumatic disorders. *Psychiatry*  
12  
13 2009;8(8):282-287.  
14
- 15 9. Fan F, Zhang Y, Yang Y, *et al.* Symptoms of posttraumatic stress disorder, depression, and  
16  
17 anxiety among adolescents following the 2008 Wenchuan earthquake in China. *J Trauma Stress*  
18  
19 2011;24(1): 44–53.  
20  
21
- 22 10. Boe HJ, Holgersen KH, Hølen A. Mental health outcomes and predictors of chronic disorders  
23  
24 after the North Sea oil rig disaster: 27-year longitudinal follow-up study. *J Nerv Ment Dis*  
25  
26 2011;199(1):49–54.  
27  
28
- 29 11. Wang YL, Xie W, Yang ZH, *et al.* Research progress of posttraumatic stress disorder in China.  
30  
31 *Chinese Journal of Applied Psychology* 2005;11(2):176-180.  
32  
33
- 34 12. Alexander DA, Klein S. Ambulance personnel and critical incidents: impact of accident and  
35  
36 emergency work on mental health and emotional well-being. *Brit J Psychia* 2001;178(1):76.  
37  
38
- 39 13. Jonsson A, Segesten K, Mattsson B. Post-traumatic stress among Swedish ambulance personnel.  
40  
41 *Emerg Med J* 2003;20(1):79-84.  
42  
43
- 44 14. Laposa JM, Alden LE, Fullerton LM. Work stress and posttraumatic stress disorder in ED nurses  
45  
46 /personnel. *J Emerg Nurs* 2003;29(1):23-28.  
47  
48
- 49 15. Shoji K, Lesnierowska M, Smoktunowicz E, *et al.* What Comes First, Job Burnout or Secondary  
50  
51 Traumatic Stress? Findings from Two Longitudinal Studies from the U.S. and Poland. *Plos One*  
52  
53 2015;10(8):e0136730.  
54  
55  
56  
57  
58  
59  
60

- 1  
2  
3  
4 16. Boer JD, Lok A, Verlaat EV, *et al.* Work-related critical incidents in hospital-based health care  
5  
6 providers and the risk of post-traumatic stress symptoms, anxiety, and depression: A meta-ana  
7  
8 lysis. *Soc Sci Med* 2011;73(2):316-326.
- 9  
10  
11 17. Krug EG, Mercy JA, Dahlberg LL, *et al.* The world report on violence and health. *Lancet* 2002;  
12  
13 360(9339):1083.
- 14  
15  
16 18. Ray MM. The dark side of the job: Violence in the emergency department. *J Emerg Nurs* 2007;33  
17  
18 :257-261.
- 19  
20  
21 19. Ahmad M, Al-Rimawi R, Masadeh A, *et al.* Workplace Violence by Patients and their Families  
22  
23 against Nurses: Literature Review. *Int J Nurs Termin CI* 2015;2(4):46-55.
- 24  
25  
26 20. Ramacciati N, Ceccagnoli A, Addey B. Violence against nurses in the triage area: An Italian  
27  
28 qualitative study. *Int Emerg Nurs* 2015;23(4):274-280.
- 29  
30  
31 21. Harrell, Erika. Workplace Violence, 1993-2009: National Crime Victimization Survey and the  
32  
33 Census of Fatal Occupational Injuries. *Digitalcommons* 2011.
- 34  
35  
36 22. Magnavita N, Heponiemi T. Workplace violence against nursing students and nurses: an Italian  
37  
38 experience. *J Nurs Scholarsh* 2011;43(2):203-210.
- 39  
40  
41 23. Fute M, Mengesha ZB, Wakgari N, *et al.* High prevalence of workplace violence among nurses  
42  
43 working at public health facilities in Southern Ethiopia. *BMC Nurs* 2015;14:9.
- 44  
45  
46 24. Al-Omari H. Physical and verbal workplace violence against nurses in Jordan. *Int Nurs Rev*  
47  
48 2015;62(1):111-118.
- 49  
50  
51 25. Schablon A, Zeh A, Wendeler D, *et al.* Frequency and consequences of violence and aggression  
52  
53 towards employees in the German healthcare and welfare system: a cross-sectional study. *BMJ*  
54  
55 *Open* 2011;2(5):421-421.



- 1  
2  
3  
4  
5  
6  
7  
8  
9  
10  
11  
12  
13  
14  
15  
16  
17  
18  
19  
20  
21  
22  
23  
24  
25  
26  
27  
28  
29  
30  
31  
32  
33  
34  
35  
36  
37  
38  
39  
40  
41  
42  
43  
44  
45  
46  
47  
48  
49  
50  
51  
52  
53  
54  
55  
56  
57  
58  
59  
60
26. Najafi F, Fallahi-Khoshknab M, Dalvandi A, *et al.* Workplace violence against Iranian nurses: A systematic review. *J Health Promot Manage* 2014;3:72-85.
  27. Pan Y, Yang XH, He JP, *et al.* To be or not to be a doctor, that is the question: a review of serious incidents of violence against doctors in China from 2003–2013. *J public health* 2015;23(2):111-116
  28. Laposa JM, Alden LE. Posttraumatic stress disorder in the emergency room: exploration of a cognitive model. *Behav Res Ther* 2003;41(1):49-65.
  29. Mills LD, Mills TJ. Symptoms of post-traumatic stress disorder among emergency medicine residents. *J Emerg Med* 2005;28(1):1–4.
  30. Friedman, MJ, Resick, PA, Bryant, R.A, *et al.* Considering PTSD for DSM-5. *Depress Anxiety* 2011;28(9):750-769.
  31. Robertson N, Perry A. Institutionally based health care workers' exposure to traumatogenic events: Systematic review of PTSD presentation. *Journal of Traumatic Stress* 2010;23(3):417-420.
  32. Kornblith AB, Herndon JE, Weiss RB, *et al.* Long-term adjustment of survivors of early-stage breast carcinoma, 20 years after adjuvant chemotherapy. *Cancer* 2003;98(4):679–689.
  33. Rourke MT, Hobbie WL, Schwartz L, *et al.* Posttraumatic stress disorder (PTSD) in young adult survivors of childhood cancer. *Pediatr Blood Cancer* 2007; 49(2): 177–82.
  34. Perrin M, Vandeleur C L, Castelao E, *et al.* Determinants of the development of post-traumatic stress disorder, in the general population. *Soc Psych Psych Epid* 2014;49(3):447-457.
  35. Breslau N, Davis G C, Andreski P, *et al.* Traumatic events and posttraumatic stress disorder in an urban population of young adults. *Arch Gen Psychiatry* 1991;48(3):216-222.

- 1  
2  
3  
4 36. Lawrence JW, Fauerbach JA. Personality, coping, chronic stress, social support and PTSD  
5  
6 symptoms among adult burn survivors: a path analysis. *J Burn Care Rehabil* 2003;24(1):63.  
7  
8  
9 37. Kerasiotis B, Motta RW. Assessment of PTSD symptoms in emergency room, intensive care unit,  
10  
11 and general floor nurses. *Int J Emerg Ment Health* 2004;6(3):121-133.  
12  
13  
14 38. Boer JD, Lok A, Verlaat EV, *et al.* Work-related critical incidents in hospital-based health care  
15  
16 providers and the risk of post-traumatic stress symptoms, anxiety, and depression: A meta-analys  
17  
18 is. *Soc Scie Med* 2011;73(2):316-326.  
19  
20  
21 39. Shoji K, Lesniewska M, Smoktunowicz E, *et al.* What Comes First, Job Burnout or Secondary  
22  
23 Traumatic Stress? Findings from Two Longitudinal Studies from the U.S. and Poland. *Plos One*  
24  
25 2015;10(8):e0136730.  
26  
27  
28  
29 40. Cieslak R, Anderson V, Bock J, *et al.* Secondary traumatic stress among mental health providers  
30  
31 working with the military: Prevalence and its work- and exposure-related correlates. *J Nerv*  
32  
33 *Ment Dis* 2013;201(11):917-25.  
34  
35  
36 41. ILO/ICN/WHO/PSI. Framework Guidelines for Addressing Workplace Violence in the Health  
37  
38 Sector. Geneva: ILO/ICN/WHO/PSI Joint Programme on Workplace Violence in the Health  
39  
40 Sector; 2002.  
41  
42  
43 42. Zampieron A, Galeazzo M, Turra S, *et al.* Perceived aggression towards nurses: study in two  
44  
45 Italian health institutions. *J Clin Nurs* 2010;19:2329-41.  
46  
47  
48  
49 43. Battles ED. An exploration of post-traumatic stress disorder in emergency nurses following  
50  
51 Hurricane Katrina. *J Emerg Nurs* 2007;33(4):314-318.  
52  
53  
54 44. Dirk Richter K B. Post-traumatic stress disorder following patient assaults among staff members  
55  
56 of mental health hospitals: a prospective longitudinal study. *BMC Psychiatry* 2006;6(1):15.  
57  
58  
59  
60

- 1  
2  
3  
4 45. Weathers FW, Litz BT, Herman DS, *et al.* The PTSD checklist: reliability, validity & diagnostic  
5  
6 utility. Paper presented at the Annual Meeting of the International Society for Traumatic Stress  
7  
8 Studies, *San Antonio, TX* 1993.  
9  
10  
11 46. Wu Z, Xu J, Sui Y. Posttraumatic stress disorder and posttraumatic growth coexistence and the  
12  
13 risk factors in Wenchuan earthquake survivors. *Psychiatry Res* 2016; 237:49-54.  
14  
15  
16 47. Qian M, Wu G, Zhu R, *et al.* Development of the revised Eysenck Personality Questionnaire  
17  
18 Short Scale for Chinese (EPQ-RSC). *Acta Psychologica Sinica* 2000;32(3):317-323.  
19  
20  
21 48. Zhang Z, Shi Z, Wang L, *et al.* Post-traumatic stress disorder, anxiety and depression among the  
22  
23 elderly: a survey of the hard-hit areas a year after the Wenchuan earthquake. *Stress Health* 2012;  
24  
25 28(1):61-68.  
26  
27  
28 49. Cui Y, Tian SS, Qiao N, *et al.* Associations of Individual-Related and Job-Related Risk Factors  
29  
30 with Nonfatal Occupational Injury in the Coal Workers of Shanxi Province: A Cross-Sectional  
31  
32 Study. *PLoS One* 2015;10(7):e0134367.  
33  
34  
35 50. Zhang L, Zhang J X, Wen-Juan X U, *et al.* An evaluation of validity and reliability on the trait  
36  
37 coping style questionnaire(TCSQ) using for Chinese soldier. *Chinese Journal of Disease Control*  
38  
39 & *Prevention* 2010.  
40  
41  
42 51. Li-Na L I, Zhao Y, Cui X J, *et al.* The Influence Factors and Status on Male Vicarious Trauma of  
43  
44 Disaster. *Chinese General Practice* 2014.  
45  
46  
47 52. Feng S, Tan H, Benjamin A, *et al.* Social support and posttraumatic stress disorder among flood  
48  
49 victims in Hunan, China. *Ann Epidemiol.* 2007;17(10):827-833.  
50  
51  
52 53. Li H, Yan C, Zhu S, *et al.* Correlation among coping style, social support, and negative emotion  
53  
54 in infertile women. *Zhong nan da xue xue bao. Yi xue ban=Journal of Central South University.*  
55  
56  
57  
58  
59  
60

- 1  
2  
3  
4 *Medical sciences* 2011;36(2):138-142.
- 5  
6 54. Chang-Fei LU, Jia CX, Zhang JY, *et al.* Reliability and validity of Social Support Rating Scale  
7  
8 in rural suicides. *Chinese Mental Health Journal* 2011;25(3):218-222.
- 9  
10  
11 55. Mealer ML, Shelton A, Berg B, *et al.* Increased prevalence of post-traumatic stress disorder  
12  
13 symptoms in critical care nurses. *Am J Resp Crit Care* 2007;175(175):693-697.
- 14  
15  
16 56. Zafar W, Khan UR, Siddiqui SA, *et al.* Workplace Violence and Self-reported Psychological  
17  
18 Health: Coping with Post-traumatic Stress, Mental Distress, and Burnout among Physicians  
19  
20 Working in the Emergency Departments Compared to Other Specialties in Pakistan. *J Emerg*  
21  
22 *Med* 2015;50(1):167-177.
- 23  
24  
25  
26 57. Johansen VA, Eilertsen DE, Nordanger D, *et al.* Prevalence, comorbidity and stability of  
27  
28 post-traumatic stress disorder and anxiety and depression symptoms after exposure to physical  
29  
30 assault: an 8-year prospective longitudinal study. *Nord J Psychiatry* 2013; 67(1):69-80.
- 31  
32  
33  
34 58. Breslau N. The epidemiology of post-traumatic stress disorder; what is the extent of the problem?  
35  
36 *Journal of Clinical Psychiatric* 2001;62:16-22.
- 37  
38  
39 59. Kaniasty K, Norris FH. Mobilization and deterioration of social support following natural  
40  
41 disasters. *Current Directions in Psychological Science* 1995;4(3):94-98.
- 42  
43  
44 60. Norris FH, Kaniasty K. Received and perceived social support in times of stress: a test of the  
45  
46 social support deterioration deterrence model. *Journal of Personality & Social Psychology*  
47  
48 1996;71(3):498-511.
- 49  
50  
51 61. Freedman SA, Gluck N, Tuval-Mashiach R, *et al.* Gender differences in responses to traumatic  
52  
53 events: a prospective study. *J Trauma Stress* 2002;15:407-413.
- 54  
55  
56 62. Pratchett LC, Pelcovitz MR, Yehuda R. Trauma and violence: are women the weaker sex?  
57  
58  
59  
60

1  
2  
3  
4 *Psychiatr Clin North Am* 2010; 33: 465–474.  
5

- 6 63. Benight CC, Bandura A. Social cognitive theory of posttraumatic recovery: the role of perceived  
7  
8 self-efficacy. *Behaviour Research & Therapy* 2004;42(10):1129.  
9  
10  
11  
12  
13  
14  
15  
16  
17  
18  
19  
20  
21  
22  
23  
24  
25  
26  
27  
28  
29  
30  
31  
32  
33  
34  
35  
36  
37  
38  
39  
40  
41  
42  
43  
44  
45  
46  
47  
48  
49  
50  
51  
52  
53  
54  
55  
56  
57  
58  
59  
60

For peer review only

STROBE 2007 (v4) Statement—Checklist of items that should be included in reports of *cross-sectional studies*

| Section/Topic        | Item # | Recommendation                                                                                                                           | Reported on page #                            |
|----------------------|--------|------------------------------------------------------------------------------------------------------------------------------------------|-----------------------------------------------|
| Title and abstract   | 1      | (a) Indicate the study's design with a commonly used term in the title or the abstract                                                   | Page 1, line 6;<br>p. 2, line 21              |
|                      |        | (b) Provide in the abstract an informative and balanced summary of what was done and what was found                                      | P. 2 ; p.3, line 6-17                         |
| <b>Introduction</b>  |        |                                                                                                                                          |                                               |
| Background/rationale | 2      | Explain the scientific background and rationale for the investigation being reported                                                     | P. 4; p. 5; p. 6, line 4-32                   |
| Objectives           | 3      | State specific objectives, including any prespecified hypotheses                                                                         | P. 6, line 34-39                              |
| <b>Methods</b>       |        |                                                                                                                                          |                                               |
| Study design         | 4      | Present key elements of study design early in the paper                                                                                  | P. 7, line 14-24                              |
| Setting              | 5      | Describe the setting, locations, and relevant dates, including periods of recruitment, exposure, follow-up, and data collection          | P. 6, line 47-58; p. 7, line 4-14; line 24-39 |
| Participants         | 6      | (a) Give the eligibility criteria, and the sources and methods of selection of participants                                              | P. 7, line 42-57; p.8, 4                      |
| Variables            | 7      | Clearly define all outcomes, exposures, predictors, potential confounders, and effect modifiers. Give diagnostic criteria, if applicable | P. 8, line 11-29                              |
| Data sources/        | 8*     | For each variable of interest, give sources of data and details of methods of assessment (measurement). Describe                         | P. 8, line 31-57; p.9;                        |

|                        |     |                                                                                                                                                                                                   |                                                     |
|------------------------|-----|---------------------------------------------------------------------------------------------------------------------------------------------------------------------------------------------------|-----------------------------------------------------|
| measurement            |     | comparability of assessment methods if there is more than one group                                                                                                                               | p.10; p. 11, line 4-39                              |
| Bias                   | 9   | Describe any efforts to address potential sources of bias                                                                                                                                         | P. 6, line 57; p. 7, line 4                         |
| Study size             | 10  | Explain how the study size was arrived at                                                                                                                                                         | P. 7, line 24-32                                    |
| Quantitative variables | 11  | Explain how quantitative variables were handled in the analyses. If applicable, describe which groupings were chosen and why                                                                      | p. 11, line 52-17; p. 12, line 4-6; P.6, line 11-31 |
| Statistical methods    | 12  | (a) Describe all statistical methods, including those used to control for confounding                                                                                                             | P. 11, line 52-57; p. 12, line 2-24                 |
|                        |     | (b) Describe any methods used to examine subgroups and interactions                                                                                                                               | P. 12, line 4-16                                    |
|                        |     | (c) Explain how missing data were addressed                                                                                                                                                       | P. 11, line 47-52                                   |
|                        |     | (d) If applicable, describe analytical methods taking account of sampling strategy                                                                                                                | P. 12, line 4-16                                    |
|                        |     | (e) Describe any sensitivity analyses                                                                                                                                                             | P. 11, line 54; p. 12, line 16-24                   |
| <b>Results</b>         |     |                                                                                                                                                                                                   |                                                     |
| Participants           | 13* | (a) Report numbers of individuals at each stage of study—eg numbers potentially eligible, examined for eligibility, confirmed eligible, included in the study, completing follow-up, and analysed | P. 13, line 42-47                                   |
|                        |     | (b) Give reasons for non-participation at each stage                                                                                                                                              | P. 7, line 47-57                                    |
|                        |     | (c) Consider use of a flow diagram                                                                                                                                                                | No                                                  |
| Descriptive data       | 14* | (a) Give characteristics of study participants (eg demographic, clinical, social) and information on exposures and potential confounders                                                          | P. 13; p.14                                         |

|                          |     |                                                                                                                                                                                                              |                                     |
|--------------------------|-----|--------------------------------------------------------------------------------------------------------------------------------------------------------------------------------------------------------------|-------------------------------------|
|                          |     | (b) Indicate number of participants with missing data for each variable of interest                                                                                                                          | P. 11, line 47-49                   |
| Outcome data             | 15* | Report numbers of outcome events or summary measures                                                                                                                                                         | P. 15, line 4-50                    |
| Main results             | 16  | (a) Give unadjusted estimates and, if applicable, confounder-adjusted estimates and their precision (eg, 95% confidence interval). Make clear which confounders were adjusted for and why they were included | P. 17, line 17-58; p. 18, line 3-47 |
|                          |     | (b) Report category boundaries when continuous variables were categorized                                                                                                                                    | P. 8, line 9-29                     |
|                          |     | (c) If relevant, consider translating estimates of relative risk into absolute risk for a meaningful time period                                                                                             | P. 13, line 42-59; p. 14; p.16      |
| Other analyses           | 17  | Report other analyses done—eg analyses of subgroups and interactions, and sensitivity analyses                                                                                                               | P. 17, line 16-44                   |
| <b>Discussion</b>        |     |                                                                                                                                                                                                              |                                     |
| Key results              | 18  | Summarise key results with reference to study objectives                                                                                                                                                     | P. 18, line 54-57; p. 19. Line 4-9  |
| Limitations              | 19  | Discuss limitations of the study, taking into account sources of potential bias or imprecision. Discuss both direction and magnitude of any potential bias                                                   | P. 22, Line 27-42                   |
| Interpretation           | 20  | Give a cautious overall interpretation of results considering objectives, limitations, multiplicity of analyses, results from similar studies, and other relevant evidence                                   | P. 19; p.20; p.21; p. 22, line 4-42 |
| Generalisability         | 21  | Discuss the generalisability (external validity) of the study results                                                                                                                                        | P. 22, line 12-42                   |
| <b>Other information</b> |     |                                                                                                                                                                                                              |                                     |
| Funding                  | 22  | Give the source of funding and the role of the funders for the present study and, if applicable, for the original study on which the present article is based                                                | P. 23, line 27-29                   |

\*Give information separately for cases and controls in case-control studies and, if applicable, for exposed and unexposed groups in cohort and cross-sectional studies.



1  
2  
3  
4  
5  
6 **Note:** An Explanation and Elaboration article discusses each checklist item and gives methodological background and published examples of transparent reporting. The STROBE  
7 checklist is best used in conjunction with this article (freely available on the Web sites of PLoS Medicine at <http://www.plosmedicine.org/>, Annals of Internal Medicine at  
8 <http://www.annals.org/>, and Epidemiology at <http://www.epidem.com/>). Information on the STROBE Initiative is available at [www.strobe-statement.org](http://www.strobe-statement.org).  
9  
10  
11  
12  
13  
14  
15  
16  
17  
18  
19  
20  
21  
22  
23  
24  
25  
26  
27  
28  
29  
30  
31  
32  
33  
34  
35  
36  
37  
38  
39  
40  
41  
42  
43  
44  
45  
46  
47  
48  
49
